# Supplementary material for: Serotype 3 Experimental Human Pneumococcal Challenge (EHPC) study protocol: dose ranging and reproducibility in a healthy volunteer population (challenge 3)
Source: PubMed Central journal article supplement — BMJ Open. 2024 Jan 10;14(1):e075948. doi: 10.1136/bmjopen-2023-075948 (PMC10806732; doi:10.1136/bmjopen-2023-075948), 2024-01-10
Supplement: bmjopen-2023-075948.draft_revisions.pdf [file bmjopen-2023-075948.draft_revisions.pdf]

# BMJ Open

BMJ Open is committed to open peer review. As part of this commitment we make the peer review history of every article we publish publicly available.

When an article is published we post the peer reviewers' comments and the authors' responses online. We also post the versions of the paper that were used during peer review. These are the versions that the peer review comments apply to.

The versions of the paper that follow are the versions that were submitted during the peer review process. They are not the versions of record or the final published versions. They should not be cited or distributed as the published version of this manuscript.

BMJ Open is an open access journal and the full, final, typeset and author-corrected version of record of the manuscript is available on our site with no access controls, subscription charges or pay-per-view fees (<http://bmjopen.bmj.com>).

If you have any questions on BMJ Open's open peer review process please email [info.bmjopen@bmj.com](mailto:info.bmjopen@bmj.com)

# BMJ Open

## Serotype 3 Experimental Human Pneumococcal Challenge (EHPC); Dose ranging and reproducibility in a healthy volunteer population (Challenge 3)

|                               |                                                                                                                                                                                                                                                                                                                                                                                                                                                                                                                                                                                                                                                                                                                                                                                                                                                                                                                                                                                                                                                                                                                                                                                                                                                                                                                                                                                                                                                                                                                                                                                                                                                                                                                                                                                                                                                                                                                                                                                                                                                                                      |
|-------------------------------|--------------------------------------------------------------------------------------------------------------------------------------------------------------------------------------------------------------------------------------------------------------------------------------------------------------------------------------------------------------------------------------------------------------------------------------------------------------------------------------------------------------------------------------------------------------------------------------------------------------------------------------------------------------------------------------------------------------------------------------------------------------------------------------------------------------------------------------------------------------------------------------------------------------------------------------------------------------------------------------------------------------------------------------------------------------------------------------------------------------------------------------------------------------------------------------------------------------------------------------------------------------------------------------------------------------------------------------------------------------------------------------------------------------------------------------------------------------------------------------------------------------------------------------------------------------------------------------------------------------------------------------------------------------------------------------------------------------------------------------------------------------------------------------------------------------------------------------------------------------------------------------------------------------------------------------------------------------------------------------------------------------------------------------------------------------------------------------|
| Journal:                      | <i>BMJ Open</i>                                                                                                                                                                                                                                                                                                                                                                                                                                                                                                                                                                                                                                                                                                                                                                                                                                                                                                                                                                                                                                                                                                                                                                                                                                                                                                                                                                                                                                                                                                                                                                                                                                                                                                                                                                                                                                                                                                                                                                                                                                                                      |
| Manuscript ID                 | bmjopen-2023-075948                                                                                                                                                                                                                                                                                                                                                                                                                                                                                                                                                                                                                                                                                                                                                                                                                                                                                                                                                                                                                                                                                                                                                                                                                                                                                                                                                                                                                                                                                                                                                                                                                                                                                                                                                                                                                                                                                                                                                                                                                                                                  |
| Article Type:                 | Protocol                                                                                                                                                                                                                                                                                                                                                                                                                                                                                                                                                                                                                                                                                                                                                                                                                                                                                                                                                                                                                                                                                                                                                                                                                                                                                                                                                                                                                                                                                                                                                                                                                                                                                                                                                                                                                                                                                                                                                                                                                                                                             |
| Date Submitted by the Author: | 23-May-2023                                                                                                                                                                                                                                                                                                                                                                                                                                                                                                                                                                                                                                                                                                                                                                                                                                                                                                                                                                                                                                                                                                                                                                                                                                                                                                                                                                                                                                                                                                                                                                                                                                                                                                                                                                                                                                                                                                                                                                                                                                                                          |
| Complete List of Authors:     | <p>Hazenberg, Phoebe; Liverpool School of Tropical Medicine, Liverpool Vaccine Group</p> <p>Robinson, Ryan; Liverpool School of Tropical Medicine, Liverpool Vaccine Group; Liverpool University Hospitals NHS Foundation Trust, Respiratory department</p> <p>Farrar, Madlen; Liverpool School of Tropical Medicine, Liverpool Vaccine Group</p> <p>Solorzano, Carla; Liverpool School of Tropical Medicine, Liverpool Vaccine Group ; University of Oxford, Oxford Vaccine Group</p> <p>Hyder-Wright, Angela; Liverpool School of Tropical Medicine, Liverpool Vaccine Group ; Liverpool University Hospitals NHS Foundation Trust, Respiratory Department</p> <p>Liatsikos, Konstantinos; Liverpool School of Tropical Medicine, Liverpool Vaccine Group</p> <p>Brunning, Jaye; Liverpool School of Tropical Medicine, Liverpool Vaccine Group</p> <p>Fleet, Hannah; Liverpool School of Tropical Medicine, Liverpool Vaccine Group</p> <p>Bettam, Amy; Liverpool School of Tropical Medicine, Liverpool Vaccine Group</p> <p>Howard, Ashleigh; Liverpool School of Tropical Medicine, Liverpool Vaccine Group</p> <p>Kenny-Nyazika, Tinashe; Liverpool School of Tropical Medicine, Liverpool Vaccine Group</p> <p>Urban, Britta; Liverpool School of Tropical Medicine, Liverpool Vaccine Group ; University of Oxford, Oxford Vaccine Group</p> <p>Mitsi, Elena; Liverpool School of Tropical Medicine, Liverpool Vaccine Group ; University of Oxford, Oxford Vaccine Group</p> <p>El Safadi, Dima; Liverpool School of Tropical Medicine, Liverpool Vaccine Group</p> <p>Davies, Kelly; Liverpool School of Tropical Medicine, Liverpool Vaccine Group</p> <p>Lesosky, Maia; Liverpool School of Tropical Medicine Department of Clinical Sciences, Global Health Trials Unit</p> <p>Gordon, Stephen; Liverpool School of Tropical Medicine, Liverpool Vaccine Group ; Malawi-Liverpool-Wellcome Trust Clinical Research Programme</p> <p>Ferreira, Daniela; Liverpool School of Tropical Medicine, Liverpool Vaccine Group ; University of Oxford, Oxford Vaccine Group</p> |

1  
2  
3  
4  
5  
6  
7  
8  
9  
10  
11  
12  
13  
14  
15  
16  
17  
18  
19  
20  
21  
22  
23  
24  
25  
26  
27  
28  
29  
30  
31  
32  
33  
34  
35  
36  
37  
38  
39  
40  
41  
42  
43  
44  
45  
46  
47  
48  
49  
50  
51  
52  
53  
54  
55  
56  
57  
58  
59  
60

|           |                                                                                                                                                              |
|-----------|--------------------------------------------------------------------------------------------------------------------------------------------------------------|
|           | Collins, Andrea; Liverpool School of Tropical Medicine, Liverpool Vaccine Group; Liverpool University Hospitals NHS Foundation Trust, Respiratory Department |
| Keywords: | Respiratory infections < THORACIC MEDICINE, BACTERIOLOGY, Clinical Trial, Immunology < THORACIC MEDICINE, Adult thoracic medicine < THORACIC MEDICINE        |
|           |                                                                                                                                                              |

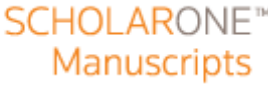

1  
2  
3 1 **Serotype 3 Experimental Human Pneumococcal Challenge (EHPC); Dose ranging and**  
4 2 **reproducibility in a healthy volunteer population (Challenge 3)**  
5  
6  
7 3

8  
9 4 Phoebe Hazenberg<sup>1</sup>, Ryan Robinson<sup>1,3</sup>, Madlen Farrar<sup>1</sup>, Carla Solórzano<sup>1,2</sup>, Angela Hyder-Wright<sup>1,3</sup>,  
10 5 Konstantinos Liatsikos<sup>1</sup>, Jaye Brunning<sup>1</sup>, Hannah Fleet<sup>1</sup>, Amy Bettam<sup>1</sup>, Ashleigh Howard<sup>1</sup>, Tinashe K.  
11 6 Nyazika<sup>1</sup>, Britta C Urban<sup>1,2</sup>, Elena Mitsi<sup>1,2</sup>, Dima El Safadi<sup>1</sup>, Kelly Davies<sup>1</sup>, Maia Lesosky<sup>4</sup>, Stephen B.  
12 7 Gordon<sup>1,5</sup>, Daniela M. Ferreira<sup>1,2\*</sup>, Andrea M. Collins<sup>1,3\*</sup>

13  
14  
15 8 <sup>1</sup>Liverpool Vaccine Group, Liverpool School of Tropical Medicine, UK

16  
17 9 <sup>2</sup> Oxford Vaccine Group, University of Oxford, UK

18  
19 10 <sup>3</sup> Respiratory Research Group, Liverpool University Hospital Foundation Trust, UK

20  
21 11 <sup>4</sup>Clinical Trials Unit, Liverpool School of Tropical Medicine, UK

22  
23 12 <sup>5</sup>Malawi-Liverpool-Wellcome Trust Clinical Research Programme, Malawi

24  
25 13 \*joint senior authors  
26  
27  
28 14

29  
30 15 **Corresponding authors:**

31  
32 16 Andrea Collins (contact for public queries)

33  
34 17 Email address: [andrea.collins@lstmed.ac.uk](mailto:andrea.collins@lstmed.ac.uk)

35  
36 18 Address: Liverpool Life Sciences Accelerator Building, 1 Daulby Street, Liverpool, L7 8XZ

37  
38 19 Daniela Ferreira

39  
40 20 Email: [daniela.ferreira@paediatrics.ox.ac.uk](mailto:daniela.ferreira@paediatrics.ox.ac.uk)

41  
42 21 Address: Old Road Campus, University of Oxford Campus, Old Rd, Roosevelt Dr, Headington, Oxford  
43 22 OX3 7TY

44  
45 23  
46 24 **Sponsor:** Liverpool School of Tropical Medicine, Research and Development, Pembroke Place,  
47 25 Liverpool, L3 5QA; Phone: 0151 705 3794; Email: [denise.watson@lstmed.ac.uk](mailto:denise.watson@lstmed.ac.uk)

48  
49  
50 26  
51 27 **Keywords:** Adolescent, Adult, Healthy Volunteers, Humans, Middle Aged, Nasopharynx,  
52 28 Pneumococcal Pneumonia, Pneumococcal Vaccines,

53  
54 29 **Countries of recruitment:** United Kingdom

55  
56 30 **Recruitment status:** currently recruiting and enrolling participants  
57  
58 31  
59  
60

32

**ABSTRACT****Introduction**

Since the introduction of pneumococcal conjugate vaccines (PCVs), pneumococcal disease rates have declined for many vaccine-type (VT) serotypes. However, serotype 3 (SPN3) continues to cause significant disease and is identified in colonisation epidemiological studies as one of the top circulating serotypes in adults in the UK. Consequently, new vaccines that provide greater protection against SPN3 colonisation/carriage are urgently needed. The Experimental Human Pneumococcal Challenge (EHPC) model is a unique method of determining pneumococcal colonisation rates, understanding acquired immunity, and testing vaccines in a cost-effective manner. To enhance the development of effective pneumococcal vaccines against SPN3, we aim to develop a new relevant and safe SPN3 EHPC model with high attack rates which could be used to test vaccines using small sample size.

**Methods and Analysis**

This is a human challenge study to establish a new SPN3 EHPC model, consisting of two parts. In the dose-ranging/safety study, cohorts of 10 healthy participants will be challenged with escalating doses of SPN3. If first challenge does not lead into colonisation, participants will receive a second challenge 2-weeks after. Experimental nasopharyngeal (NP) colonisation will be determined using nasal wash sampling. Using the dose that results in  $\geq 50\%$  of participants being colonised, with a high safety profile, we will complete the cohort with another 33 participants to check for reproducibility of the colonisation rate. The primary outcome of this study is to determine the optimal SPN3 dose and inoculation regime to establish the highest rates of NP colonisation in healthy adults. Secondary outcomes include determining density and duration of experimental SPN3 NP colonisation and characterising mucosal and systemic immune responses to SPN3 challenge.

**Ethics and Dissemination**

This study is approved by the NHS Research and Ethics Committee (Reference 22/NW/0051). Findings will be published in peer-reviewed journals and reports will be made available to participants.

ISRCTN registry number: 17879306. Registered 4<sup>th</sup> April 2022. Protocol version 3.0 (7<sup>th</sup> April 2022).

**ARTICLE SUMMARY****Strengths and Limitations of the Study**

- The use of a novel inoculation regime of a second (targeted booster) inoculation to participants not colonised after first challenge could increase colonisation rates, (unpublished data from ISRCTN12884329); higher colonisation rates will allow smaller sample sizes in future vaccine work, reducing study costs and time, resulting in improved, more globally accessible pneumococcal vaccines faster.

- 1  
2  
3 67 • Additionally, the use of clinical globally relevant strains from the UK and Malawi not used before  
4 68 in EHPC studies will allow the independent conduct of future pneumococcal vaccine studies in  
5 69 various settings and potentially a future global co-challenge collaborations network.  
6  
7 70 • The evaluation of bacterial shedding of SPN3 through hand swabs, cough plates and exhaled  
8 71 detection facemasks is novel and could provide greater understanding of how SPN3 is spread  
9 72 amongst individuals, eventually leading to improved infection and prevention control in  
10 73 hospitalised patients.  
11  
12 74 • Follow-up beyond 14 days will allow evaluation of longer-term local immune response to SPN3  
13 75 and as well as providing longer term data on colonisation rate, density and duration.  
14  
15 76 • The main limitation of this study is the similarity to the EHPC Pneumo 1 study (1), which used  
16 77 different SPN3 isolates that are proprietary to a 3<sup>rd</sup> party to establish an SPN3 model.  
17  
18  
19  
20 78

## 79 INTRODUCTION

80 *Streptococcus pneumoniae* (SPN) is a major cause of morbidity and mortality from a lower respiratory  
81 tract infection globally(2). Available pneumococcal conjugated vaccines (PCVs) confer protection by  
82 reducing vaccine-type (VT) SPN colonisation density and are effective against invasive pneumococcal  
83 disease (IPD) (3). After the introduction of PCV-13 into national paediatric immunisation programs,  
84 overall combined-VT IPD amongst all ages significantly reduced (4). However, surveillance data  
85 showed limited declines in serotype 3 (SPN3) IPD in all ages, despite this serotype being included in  
86 PCV-13(5). This is thought to be due to specific characteristics of the SPN3 capsule(6), which could  
87 theoretically overwhelm the protective capacity of antibodies that are produced in response to the  
88 vaccine. There could be also other evasion mechanisms apart from antibody responses that could play  
89 a role in why SPN3 is different and continues to circulate amongst vaccinated communities.

90 An observational study of IPD rates in England 2014-2018 showed an increase in SPN3 IPD cases,  
91 with SPN3 contributing the most to total IPD deaths(7). Furthermore, a randomised controlled trial  
92 (RCT) did not show significant difference in SPN3 colonisation post PCV-13 in infants when compared  
93 to PCV-7 (which does not include SPN3) as a control (8). Taken altogether, current data suggests that  
94 even if PCV-13 protects against SPN3 directly to some degree, it does not sufficiently produce the  
95 sustained indirect protective effects seen against other VTs. Therefore, novel vaccines providing higher  
96 levels of protection against SPN3 colonisation (and therefore disease) are needed.

97 The Experimental Human Pneumococcal Challenge (EHPC) model allows vaccines to be tested for  
98 their effect on experimental SPN colonisation/carriage, in a more cost-effective manner than field  
99 studies, with fewer participants and shorter follow-up (9-11). Participants are intranasally inoculated  
100 with SPN, inducing a stable colonisation episode for about 1-3 weeks, at a density typical of natural  
101 colonisation. Host samples including nasal washes, nasal cells and blood are taken to assess  
102 colonisation as well as the immune responses. The model has provided key insights into human  
103 immune mechanisms that are associated with protection and susceptibility to colonisation acquisition  
104 (12-14). The model is well developed for serotypes SPN6B and SPN15B with over 2000 challenges in  
105 over 15 independent studies, showing the model is safe and has reproducible attack rates. In recent  
106 studies the model has been used to explore bacterial shedding and the transmission potential of  
107 SPN6B, demonstrating that hands can be a vehicle for transmission of SPN6B and lead to 18%  
108 colonisation when suspensions containing the bacteria are either sniffed from the hand or inserted into  
109 the nose via a finger (15). SPN transmission has been associated with living with a larger number of  
110 people, typically in prisons or nursing homes(16), therefore evaluating methods of shedding provides  
111 invaluable insight into how this transmission occurs and can be prevented.

112 More recently, 96 healthy participants were challenged with three different proprietary strains of SPN3  
113 at various doses. Colonisation rates varied from 30-70% and the model was shown to be safe and  
114 feasible (1). Interestingly, there was no increase in levels of nasal SPN3 anti-capsular antibodies in  
115 colonised participants at day-14 post-inoculation, suggesting that there could be a lack of  
116 immunogenicity with SPN3, unlike has been demonstrated in previous studies(8). Additionally, 30.2%  
117 of participants reported symptoms when questioned at routine clinic visits, of whom the majority

118 described a sore throat. SPN has not previously been commonly associated with pharyngitis(17) and  
119 further investigation into this is required.

120 To ensure the EHPC model remains at the cutting edge of pneumococcal (current and future) vaccine  
121 assessment, we are proposing here to set up an EHPC model with carefully selected non-proprietary  
122 SPN3 strains and a second (targeted booster) inoculation to achieve maximum attack rates. In this  
123 study, in addition to determining the optimal dose and isolate of SPN3 to establish highest rates of  
124 colonisation in the human nasopharynx, we intend to improve the knowledge of both mucosal and  
125 serological immune responses to SPN3 colonisation. We will investigate longer-term immune response  
126 to SPN3 colonisation (beyond 14 days) and for the first time we will use a targeted booster SPN3  
127 inoculation to improve colonisation rates and evaluate the impact that this has on immunogenicity. We  
128 hypothesise that this could better simulate natural SPN colonisation in high transmission settings,  
129 whereby individuals are likely to be repeatedly exposed.

130 Additional exploratory outcomes will be assessed, including evaluating SPN3 shedding and further  
131 investigating symptoms experienced post-inoculation. The results from this study will be used to inform  
132 development of improved SPN3 vaccines and to inform design of future pneumococcal vaccine RCTs.  
133 We plan to transfer this SPN3 model to Malawi, where SPN3 is a dominant disease-causing and  
134 antimicrobial resistance-transmitting serotype. Our previous transfer of the SPN6B model has been  
135 safe and successful, revealing important differences in vaccine response in highly endemic low  
136 resource settings (18).

137 The primary aim of this study is to determine the optimal SPN3 dose and isolate to establish  
138 experimental nasopharyngeal colonisation in healthy adults. Success in this project will result in:

- 139 1. Expansion of the EHPC model to demonstrate safe SPN3 colonisation with new non-proprietary  
140 isolates. This will allow better understanding of SPN3 colonisation dynamics and identification  
141 of correlates of protection.
- 142 2. Determination of the optimum isolate/dose and safety of SPN3 booster inoculation, to allow  
143 future testing of vaccines in double blind randomised controlled trials with even smaller  
144 numbers of participants than usual EHPC studies (and significantly less than are required for  
145 field studies).

## 147 **METHODS AND ANALYSIS**

### 148 **Study Overview**

149 This protocol has been designed using the SPIRIT reporting guidelines (19).

150 This is a human challenge study of healthy adult participants who will be nasally inoculated with well-  
151 characterised, fully sequenced-penicillin sensitive SPN3, for the assessment of acquisition of nasal  
152 pneumococcal colonisation and immune responses. We will conduct a dose-ranging study to determine  
153 the optimum SPN3 isolate and dose for safe colonisation acquisition and confirm the dose and safety  
154 in a subsequent larger cohort in a reproducibility study. This study will run from July 2022 to October



155 2023 at the Accelerator Research Building, Liverpool School of Tropical Medicine (LSTM), Liverpool,  
156 UK.

157 Figure 1 displays the study process. In the dose ranging study, sequential cohorts of 10 healthy  
158 participants will be challenged with escalating doses of SPN3. We will start at 10,000 colony forming  
159 unit (CFU)/naris and after n=10, escalate to 20,000 CFU/naris (n=10) and then 80,000 CFU/naris (n=10)  
160 if safe to do so. The first challenge cohort at 10,000 CFU/naris will start slowly with a smaller group  
161 (n=1-6) inoculated per week, for safety, before completing the group (n=10). We may increase the dose  
162 further depending on colonisation rates after consultation with the Trial Monitoring Group (TMG). If  
163 optimum attack/ colonisation acquisition rates are achieved ( $\geq 50\%$ ) in the lower doses, the higher dose  
164 escalation groups may not be completed - this will be discussed with the trial steering committee (TSC)  
165 before a decision to omit the higher doses is made. We may escalate the dose before a cohort of n=10  
166 is inoculated, and subsequent escalated doses may be omitted if the colonisation rates are low. This is  
167 in the interest of not inoculating participants at a dose that could be futile. This will be at the discretion  
168 of the CI.

169 Up to 2 isolates will be tested in this manner. In case of not achieving the desired attack rate with any  
170 of the isolates, the data obtained will be reviewed to either test an additional isolate or complete the  
171 cohort at a lower attack rate.

172 Using the dose, isolate and inoculation regime that results in  $\geq 50\%$  colonisation acquisition/attack rate,  
173 with a high safety profile, we will complete the cohort with another 33 participants to check for  
174 reproducibility of attack rate. In previous research conducted with SPN6B, colonisation rates of 58.5%  
175 were seen with single inoculation and of those who were negative after the first inoculation, a further  
176 41.7% then became positive after a second inoculation, resulting in a combined colonisation rate  
177 following two inoculations of 70.7%.

### 178 **Study Objectives and Outcomes**

179 Study objectives and outcomes measures are demonstrated in Table 1.

180 **Table 1. Objectives and Outcome Measures**

|                | <b>Objectives</b>                                                                                                                   | <b>Outcome Measures</b>                                                                                                                                                                                                                                                                                                                      |
|----------------|-------------------------------------------------------------------------------------------------------------------------------------|----------------------------------------------------------------------------------------------------------------------------------------------------------------------------------------------------------------------------------------------------------------------------------------------------------------------------------------------|
| <b>Primary</b> | To determine the optimal SPN3 dose and isolate to establish colonisation of the nasopharynx in healthy adults using the EHPC model. | The proportion of participants with experimental SPN3 colonisation of the nasopharynx, determined by SPN3 presence in classical microbiological culture in at least one nasal wash (NW) sample, at any time point following one or two inoculations (combined and individually). This will be assessed for each isolate and dose separately. |

|                    |                                                                                                                                              |                                                                                                                                                                                                                                                                                                 |
|--------------------|----------------------------------------------------------------------------------------------------------------------------------------------|-------------------------------------------------------------------------------------------------------------------------------------------------------------------------------------------------------------------------------------------------------------------------------------------------|
| <b>Secondary</b>   | To ascertain the rate of experimental colonisation acquisition of SPN3 in healthy adults post challenge, by classical and molecular methods. | The rate of occurrence of SPN3 experimental colonisation of the nasopharynx, determined by SPN3 presence in classical microbiological culture and qPCR (combined and individually) from at least one NW sample at any time point following one or two inoculations (combined and individually). |
|                    | To determine the density of experimental SPN3 colonisation of the nasopharynx.                                                               | The bacterial density of experimental SPN3 colonisation of the nasopharynx in NW, at each and any time point following one or two inoculations (combined and individually), determined by classical microbiological culture and molecular methods.                                              |
|                    | To determine the duration of experimental SPN3 colonisation of the nasopharynx.                                                              | The duration of experimental SPN3 colonisation of nasopharynx determined by the last NW sample following one or two inoculations (combined and individually) in which SPN3 is detected by classical microbiological culture or molecular methods.                                               |
| <b>Exploratory</b> | To determine grading score of symptoms during experimental colonisation (e.g., sore throat, rhinitis, nasal congestion).                     | The presence of mild or moderate symptoms as recorded on a Likert scale in participants with SPN3 within the first 7 days after inoculations. Sore throat grading score will also be used if applicable.                                                                                        |
|                    | To characterise mucosal immune cell populations and dynamics in response to SPN3 experimental inoculation in nasal cell samples.             | Cell immunophenotyping using flow cytometry methods to identify and characterise cell populations such as neutrophils, monocytes, T cells and B cells in nasal cells samples at screening and 2, 7, 13, 16, 21 and 28 days after first inoculation.                                             |
|                    | To determine the level of mucosal and systemic SPN3 polysaccharide-specific antibodies at baseline and after SPN3 experimental inoculation.  | Measurement of anti-SPN3 polysaccharide specific immunoglobulin G (IgG) levels in serum and nasal wash samples using ELISAs.                                                                                                                                                                    |
|                    | To determine the levels of polysaccharide specific SPN3 memory B cells at baseline and after SPN3 experimental inoculation.                  | Quantification and characterisation of the number of SPN3- polysaccharide specific memory B cell populations in PBMC samples using flow cytometry methods at screening and 13 and 28 days after first inoculation.                                                                              |
|                    | To describe nasal inflammatory kinetics induced by SPN3 experimental inoculation.                                                            | Measurement of 30 cytokines and chemokines using multiplex Luminex in nasosorption samples at screening and 2, 7, 13, 16, 21 and 28 days after first inoculation.                                                                                                                               |

|  |                                                                                                                                                  |                                                                                                                                                                                                                                                                                  |
|--|--------------------------------------------------------------------------------------------------------------------------------------------------|----------------------------------------------------------------------------------------------------------------------------------------------------------------------------------------------------------------------------------------------------------------------------------|
|  | To assess bacterial shedding after pneumococcal colonisation.                                                                                    | The rate of pneumococcal bacterial shedding as defined by swabs of hand and cough-plate based assessment post inoculation (presence and density CFU/ml) at 2, 7, 13, 16, 21 and 28 days after first inoculation. (During COVID-19 pandemic cough sampling may not be performed). |
|  | To compare 'exhaled detection facemask' (EDF) with cough plate-based methods of assessing SPN3 bacterial shedding post-pneumococcal inoculation. | The rate of pneumococcal bacterial shedding as defined by exhaled detection facemask and cough-plate based assessment post- inoculation at 2- and 7-days post-inoculation (presence and density [CFU/ml])                                                                        |
|  | To determine the effect of natural SPN (non-SPN3) colonisation on SPN3 colonisation.                                                             | The rate of occurrence and density of SPN3 colonisation of the nasopharynx post-inoculation in natural SPN carriers, determined by SPN3 presence and density in classical microbiology culture or qPCR from at least one NW sample at any timepoint post-inoculation.            |
|  | To compare rates, density and duration of SPN3 colonisation in saliva vs nasopharyngeal samples.                                                 | The presence, density and duration of SPN3 colonisation in NW and saliva samples at any timepoint post-inoculation, identified using classical microbiology culture or qPCR                                                                                                      |

181

## 182 Study Participants

### 183 Inclusion/Exclusion Criteria

184 Healthy participants aged 18-50 (inclusive) who are fluent in English, have access to a mobile telephone  
 185 and have capacity to give informed consent will be allowed to participate. This age range minimises the  
 186 risk of IPD and allows comparison with our previously published EHPC work.

187 Tables 2 outlines the exclusion criteria for this study.

### 188 Table 2. Exclusion Criteria

|                      |                                                                                                                                                                          |
|----------------------|--------------------------------------------------------------------------------------------------------------------------------------------------------------------------|
| Research participant | Currently involved in another study unless observational or non-interventional, excluding the EHPC bronchoscopy study and COVID-19 observation and interventional trials |
|                      | Participant in any previous EHPC trial in past 1 year                                                                                                                    |
|                      | Previous EHPC trial inoculated with SPN3 in last 3 years                                                                                                                 |
| Vaccination          | Previous pneumococcal vaccination PPV23 or PCV13 or PCV10.                                                                                                               |
| Allergy              | Allergy to penicillin                                                                                                                                                    |

|                                                                                                                                                                                                                                                                                                                      |                                                                                                                                                                                             |
|----------------------------------------------------------------------------------------------------------------------------------------------------------------------------------------------------------------------------------------------------------------------------------------------------------------------|---------------------------------------------------------------------------------------------------------------------------------------------------------------------------------------------|
| Comorbidities                                                                                                                                                                                                                                                                                                        | Chronic respiratory, cardiac, kidney, liver or neurological disease                                                                                                                         |
|                                                                                                                                                                                                                                                                                                                      | Connective tissue disease                                                                                                                                                                   |
|                                                                                                                                                                                                                                                                                                                      | Diabetes                                                                                                                                                                                    |
|                                                                                                                                                                                                                                                                                                                      | Immunosuppressive disease                                                                                                                                                                   |
|                                                                                                                                                                                                                                                                                                                      | Recurrent otitis media                                                                                                                                                                      |
|                                                                                                                                                                                                                                                                                                                      | Asplenia or spleen dysfunction                                                                                                                                                              |
|                                                                                                                                                                                                                                                                                                                      | Cochlear Implants                                                                                                                                                                           |
|                                                                                                                                                                                                                                                                                                                      | Major cerebrospinal fluid leak                                                                                                                                                              |
|                                                                                                                                                                                                                                                                                                                      | Uncontrolled medical/surgical conditions (at discretion of study doctor)                                                                                                                    |
|                                                                                                                                                                                                                                                                                                                      | Major pneumococcal illness requiring hospitalisation within the last 10 years                                                                                                               |
|                                                                                                                                                                                                                                                                                                                      | Other conditions considered by clinical team as a concern for safety/integrity of the study                                                                                                 |
| Medications                                                                                                                                                                                                                                                                                                          | Immunosuppressive medication                                                                                                                                                                |
|                                                                                                                                                                                                                                                                                                                      | Long-term antibiotic use or use of antibiotics in 28 days prior to inoculation                                                                                                              |
| Direct caring role or close contact with individuals at higher risk of infection (during the EHPC period) unless wearing personal protective equipment                                                                                                                                                               | Children aged under 5                                                                                                                                                                       |
|                                                                                                                                                                                                                                                                                                                      | Chronic ill health or immunosuppressed adults                                                                                                                                               |
|                                                                                                                                                                                                                                                                                                                      | People that are part of extremely vulnerable group as defined by Public Health England                                                                                                      |
| Smoking/drug/alcohol use                                                                                                                                                                                                                                                                                             | Current or ex-smoker (daily cigarettes/e-cigarettes/smoking of recreational drugs) in the last 6 months. Participants who smoke <5 cigarettes per week may be included                      |
|                                                                                                                                                                                                                                                                                                                      | Previous significant smoking history (>20 pack years)                                                                                                                                       |
|                                                                                                                                                                                                                                                                                                                      | History or current drug or alcohol abuse (frequently drinking alcohol): men and women should not regularly drink >3 units/day and >2 units/day respectively) at discretion of the clinician |
| Biologically female participants of child-bearing potential who are currently pregnant/lactating, intending on becoming pregnant or not on effective birth control                                                                                                                                                   |                                                                                                                                                                                             |
| Overseas travel (involving air travel) planned in follow up period of study visits                                                                                                                                                                                                                                   |                                                                                                                                                                                             |
| Participants who meet following criteria at time of screening:                                                                                                                                                                                                                                                       |                                                                                                                                                                                             |
| <ul style="list-style-type: none"> <li>• Unexplained/concerning findings on history/examination <ul style="list-style-type: none"> <li>• Haemoglobin &lt;90g/dL</li> </ul> </li> <li>• White cell count (WCC) &lt;math&gt;&lt;1.5 \times 10^9/l&lt;/math&gt; or &gt;math&gt;12 \times 10^9/l&lt;/math&gt;</li> </ul> |                                                                                                                                                                                             |

- Platelets  $<75 \times 10^9/l$
- Oxygen saturations  $<94\%$

189

190 Additionally, we will employ temporary exclusion criteria, including:

- 191 • COVID-19 symptoms or confirmed current COVID-19 infection.
- 192 • Current/acute illness within 14 days prior to inoculation if COVID-19 negative.
- 193 • Positive COVID-19 swab within 10 days of inoculation. Participants will require negative lateral  
194 flow test prior to inoculation.
- 195 • COVID-19 vaccination 21 days prior to inoculation.
- 196 • Natural SPN3 colonisation identified in baseline nasal wash.

197 Participants who have been temporarily excluded at screening may be re-screened at a later date to  
198 assess their eligibility at this time for inclusion into the study.

### 199 **Participant recruitment**

200 Participants will be recruited from the general public, including through public engagement events,  
201 social media, generic research communication mailing lists, large local employers and local universities.

### 202 **Participant Timeline**

203 For both parts of the study, participants will attend an identical visit schedule, however the samples  
204 taken at these visits will differ (Figure 2). Participants will attend a screening visit, inoculation visit (day  
205 0) and then follow-up visits at days 2, 7, 13 and 28. Figure 2 outlines the samples that are required at  
206 each visit.

207 All will first attend a screening visit to confirm eligibility through medical history, clinical examination and  
208 acquisition of samples including a full blood count and nasal wash sampling. Baseline nasal washes  
209 will be evaluated for natural colonisation with SPN (and serotype if present) through classical  
210 microbiological culture and molecular methods.

211 All participants will then attend an inoculation visit (day 0), where fluid containing SPN3 will be instilled  
212 into their nose. At this visit, they will be given a safety pack containing a thermometer, safety information  
213 leaflet and a 5-day course of amoxicillin. They will be instructed to contact the research team daily for  
214 3-5 days with their temperature recording and any symptoms. Participants who report symptoms  
215 consistent with pneumococcal disease will be reviewed in person by a clinician and may be instructed  
216 to take their antibiotic course. Participants have 24-hour access to research clinicians as well as access  
217 to hospital facilities and prompt treatment if required.

218 In the dose-ranging study, a second targeted booster inoculation will be given to participants on day 14  
219 if they have tested negative for SPN3 on day 2 and 7 samples. In the reproducibility study, it will be at  
220 the discretion of the chief investigator (CI) to decide if targeted booster inoculation should be applied,  
221 based on results of the dose-ranging study. If a second inoculation is included in the reproducibility  
222 study, it will be only given at day 14 to those participants who are negative for SPN3 at days 2 and 7

223 (these participants will be asked to attend additional follow-up visits at days 16 and 21 for further  
224 sampling).

225 During the dose-ranging phase, nasal wash samples pre- and post-inoculation will be collected to  
226 assess colonisation acquisition and density, by classical microbiological culture and molecular methods.  
227 Additionally, serum samples will be taken at baseline, 13 and 28-days after inoculation, to measure  
228 levels of anti-capsule polysaccharide immunoglobulin G (IgG). Nasal cell samples will be taken to  
229 characterise cellular populations and dynamics by flow cytometry.

230 During reproducibility phase, nasal wash and nasal cell samples will be collected as in the dose-ranging  
231 study. A viral swab will be collected pre-inoculation to test for viral co-infection. Nasal filters  
232 (nasosorption) will be collected pre- and post-inoculation to assess mucosal inflammation using 30-plex  
233 Luminex. Saliva samples will be taken pre- and post-inoculation to compare rates, density and duration  
234 of SPN3 colonisation in saliva and nasopharyngeal samples. Peripheral blood mononuclear cells  
235 (PBMCs) will be obtained at baseline, at 13-days and at 28-days post-inoculation. PBMCs will be used  
236 to characterise memory B cell and other immune cell populations using flow-cytometry based methods.  
237 Serum samples will be taken at baseline, 13 and 28 days after inoculation to measure levels of anti-  
238 capsule polysaccharide IgG. Exhaled detection facemasks (EDF) will be collected at day 2, to allow  
239 comparison against other shedding samples for detection of SPN3. A subgroup of participants who  
240 have demonstrated colonisation with SPN3 at day 2 will undergo EDF sampling at day 7.

241 At the end of the study, study participants who have been positive for SPN3 colonisation at any time  
242 point, and who have not subsequently had two consecutive negative nasal wash samples, will be asked  
243 to take oral amoxicillin 500mg three times daily for 5 days with the aim to clear / assist with clearing of  
244 colonisation.

### 245 **Participant Retention**

246 We will use an online booking system for appointments, to ensure that reminders are sent to participants  
247 for each appointment. There are windows of 2 days around all appointments to allow participants to  
248 move their appointments within window, if needed. Participants are remunerated on study completion.

### 249 **Data Collection Methods**

250 Samples will only be collected by staff members who are trained and delegated to do so. Table 3  
251 describes the data collection methods.

252 **Table 3. Data Collection Methods**

|                               |                                                                                                                                                                                                                                                                                                                                                                                                                                                                                                    |
|-------------------------------|----------------------------------------------------------------------------------------------------------------------------------------------------------------------------------------------------------------------------------------------------------------------------------------------------------------------------------------------------------------------------------------------------------------------------------------------------------------------------------------------------|
| Determination of colonisation | Colonisation will be defined as result of nasal washes taken at 2, 7, 13, 16, 21 and 28-days post-inoculation. Nasal washes will be performed using the Naclerio method (14), which is a validated technique to collect nasal bacterial specimens. Nasal washes will be plated onto culture media. Colonies will be confirmed as SPN3 using classical microbiological techniques. Results from the cultured nasal wash will also be confirmed using Polymerase Chain Reaction (PCR) based methods. |
|-------------------------------|----------------------------------------------------------------------------------------------------------------------------------------------------------------------------------------------------------------------------------------------------------------------------------------------------------------------------------------------------------------------------------------------------------------------------------------------------------------------------------------------------|

|                                                    |                                                                                                                                                                                                                                                                                                                                                                                                                                                                                                                                                                                                                                                                                                                                                                                                                                                                                                                                          |
|----------------------------------------------------|------------------------------------------------------------------------------------------------------------------------------------------------------------------------------------------------------------------------------------------------------------------------------------------------------------------------------------------------------------------------------------------------------------------------------------------------------------------------------------------------------------------------------------------------------------------------------------------------------------------------------------------------------------------------------------------------------------------------------------------------------------------------------------------------------------------------------------------------------------------------------------------------------------------------------------------|
| Molecular methods of determination of colonisation | DNA will be extracted from bacterial pellet post nasal wash sample centrifugation. SPN3 detection will be done by multiplex qPCR. This technique will enable us to detect individuals who are potential carriers with very low bacterial density. This multiplex qPCR is well validated in our laboratory (1).                                                                                                                                                                                                                                                                                                                                                                                                                                                                                                                                                                                                                           |
| Viral detection and quantification                 | Viral multiplex qPCR for detection and quantification will be performed on DNA and RNA of stored throat swab and/or nasal wash to detect all common respiratory viruses.                                                                                                                                                                                                                                                                                                                                                                                                                                                                                                                                                                                                                                                                                                                                                                 |
| Mucosal and systemic immune responses              | <p>Serotype-specific responses and their association with both acquisition and clearance of colonisation (density and duration) will be measured. We will compare antibody levels and function between those colonised and those protected against colonisation. Levels of immunoglobulin to the capsular polysaccharides SPN3 in serum and nasal washes before and after inoculation will be determined. Levels of SPN3-specific memory B cells will be assessed using PBMCs collected pre and post inoculation.</p> <p>Flow cytometry will be used to examine the induction of antigen-specific cellular responses in blood including B cell and T cells. Mucosal cellular responses will also be measured by flow cytometry on nasal cell samples. Additionally, the mucosal inflammatory response associated with inoculation will be evaluated using 30-plex Luminex method to detect cytokines and chemokines in nasal filters</p> |

### 253 Sample Size Calculation

254 We have adopted a step-wise approach to escalating the inoculation dose. The protocol is designed to:  
 255 a) minimise the possibility that we try repeatedly to attain colonisation at a dose in which it is unlikely to  
 256 happen; b) maximise safety by inoculating small groups before continuing onto larger groups (in which  
 257 we will have the statistical power to give reasonable precision of our estimate of colonisation rates).

258 Based on previous experience in studies of SPN6B and SPN3, we expect that with a colonisation rate  
 259 of 45%, with 95% confidence level, and a margin of error of 15%, our study will be complete 43  
 260 participants with a single inoculation dose. Depending on colonisation rates at different inoculum doses  
 261 of the SPN3 isolate, we need a minimum of 43 and a maximum of 93 participants to complete the study.  
 262 This allows for up to two isolates to be taken through to the highest dose of 80,000 CFU/100µL. For  
 263 example, if two isolates were tested at each dose in 10 participants in the dose ranging study, this would  
 264 equate to 60 participants. A further 33 participants would then take part in the reproducibility study,  
 265 equating to a total of 93 participants. To ensure that we complete the correct number of participants,  
 266 we will over-recruit to allow for screen failures and exclusion from primary outcome analysis for natural  
 267 colonisation and loss of participants due to drop out. Based on the assumption that two isolates will be  
 268 tested and estimating a 20% rate of drop out/screening failure, we will recruit a maximum of 117  
 269 participants. Participants who are natural SPN carriers will be included in analysis of exploratory  
 270 outcomes.

### 271 **Statistical Analysis Plan**

272 This is an open label, non-randomised, safety and dose escalation study in healthy participants.

273 Analyses are descriptive.

### 274 **Timing of Analysis**

275 Data will be reviewed at the middle and the end of follow up for each cohort of 10 healthy participants  
276 from the dose ranging phase as soon as database completion and lock occurs for that cohort. Data  
277 reviewed after day 7 will be for targeted booster inoculations if participants have tested negative for  
278 SPN3 on both days 2 and 7. Safety and outcome results will be reported to the trial steering committee  
279 (TSC) and trial management group (TMG). Interim analysis in the dose ranging phase is to consider  
280 addition of second inoculation dose. Analysis at the end of each cohort is to consider dose escalation  
281 (or cessation). Once the dose has been selected we will complete then reproducibility study and final  
282 analysis will be done on completion of that cohort after database completion and lock.

### 283 **Analysis Populations**

284 The intention to treat population is all participants who have been enrolled and who have received at  
285 least one inoculation dose (ITT). The main analysis population for each cohort is the modified intention  
286 to treat population (mITT), consisting of all participants who have been enrolled and received at least  
287 one inoculation dose (D0) and have had at least one valid outcome assessment measure (nasal wash).  
288 The safety analysis population is the ITT population and will include all participants who have received  
289 at least one inoculation dose.

290 Analysis will use available data. No imputation for missing endpoints will be performed.

### 291 **Covariates and Subgroups**

292 Most analysis will evaluate outcomes overall, and then for single vs two inoculation doses in the event  
293 of a second inoculation dose. Summaries will also be stratified by time point following inoculation.

### 294 **Interim Analysis and Data Monitoring**

295 Data will be reviewed on an ongoing basis for any safety or adverse events and will be reported per  
296 protocol to the TSC and data and safety monitoring committee (DSMC). Efficacy outcomes will be  
297 evaluated after day 7 to provide information on second dose and at the cohort completion to assist with  
298 decision making for the next dose escalation in sequence. The reproducibility cohort will have a single  
299 interim look, to evaluate second inoculation dose and a final analysis at the end of cohort follow up.

### 300 **Efficacy Analysis**

301 Each dose cohort (dose selection and reproducibility) will be analysed separately. Binary endpoints will  
302 be summarised as frequency (%) with 95% confidence estimates at each time point and by participant  
303 level summary. Density will be summarised using number, mean, geometric mean, standard deviation,  
304 geometric standard deviation, minimum and maximum at each time point. 95% confidence intervals will  
305 be estimated for geometric mean estimates. Duration of colonisation (days) will be analysed as a  
306 continuous variable and summarised using mean, standard deviation, minimum and maximum in the  
307 event of no censored outcomes. In the event of censoring, product limit methods will be used to estimate  
308 endpoints. The duration will be defined as the time between inoculation and the time of the last NW



309 sample that is positive for colonisation. Symptom and sore through grading scales will be summarised  
310 by frequency (%). Agreement between colonisation results from microbiological culture and qPCR will  
311 be estimated using Bland-Altman plots and estimates of agreement.

312 The reproducibility cohort alone will use generalised linear models for single measurement outcomes  
313 (colonisation at any time vs not) under a binomial model with logit link to estimate odds ratio (95%  
314 confidence interval) for strain/procedure/one or two doses as independent variables. Censored  
315 endpoints (time to colonisation) will be analysed using product limit estimates of median (95%  
316 confidence interval for the time). Exploratory immunological outcomes will be summarised as above.

### 317 **Reporting Conventions**

318 P values > 0.0001 will be reported to 4 decimal places; p-values < 0.0001 will be reported as “< 0.0001”.  
319 Distribution estimates such as mean, geometric mean, standard deviation, median and quartiles will be  
320 reported to 3 decimal places. Parameters estimates such as regression coefficients, confidence  
321 intervals and hazard ratios will be reported to three significant digits.

### 322 **Safety Reporting**

323 Adverse events (AEs) will be graded using the Division of AIDS (DAIDS) Table for Grading the Severity  
324 of Adult and Paediatric Adverse Events (20). If the severity of an AE could fall in either one of two  
325 grades, the higher of the two grades should be selected.

326 Symptoms experienced and attendance to hospital/GP will be asked about at each visit. Serious  
327 adverse events (SAEs) will be reported from the time of consent until completion of day 28 visit, or until  
328 completion of antibiotic treatment if participants require this.

329 All AEs will be recorded in the eCRF and documented in a weekly safety report. Adverse events of  
330 special interest (AESI) such as (but not limited to) headache, cough, sore throat and earache will be  
331 specifically documented and reported to the TMG, TSC and DSMC in the safety report.

332 All SAEs will be recorded on an SAE form and reported to the DSMC, Sponsor within 24 hours of  
333 discovery or notification of the event. All SAEs/AESIs will be followed until resolution/stabilisation or  
334 until the end of the participants last study visit. The DSMC will perform an independent review of SAEs.

### 335 **Auditing**

336 A Trial Monitoring Plan will be developed by the Sponsor and agreed by the TMG and CI based on the  
337 trial risk assessment. Following written standard operating procedures, the monitors will verify that the  
338 clinical trial is conducted, and data are generated, documented and reported in compliance with the  
339 protocol, good clinical practice and the applicable regulatory requirements.

## 340 **ETHICS AND DISSEMINATION**

### 341 **Research Ethics Committee Review**

342 This protocol has been reviewed by the sponsor, funder and an external peer review process. Ethical  
343 approval has been obtained from Liverpool Central Research Ethics Committee (REC) with REC  
344 reference number 22/NW/0051. The protocol, informed consent form, participant information leaflet

1  
2  
3 345 (PIL) and any proposed advertising material has been approved by REC as well. For any amendment  
4 346 to the study, the CI, in agreement with the sponsor, will submit information to REC and other appropriate  
5  
6 347 bodies. Amendments will be discussed with participants.  
7

#### 8 348 **Consent**

9 349 Potential participants will be sent a copy of the PIL (Supplemental Material 1) and invited to contact a  
10  
11 350 member of the team if they would like to participate. They will then be invited to attend a presentation  
12  
13 351 and to carry out a quiz to ensure they have understood the information given. If a participant has  
14  
15 352 voluntarily agreed to take part in the research and the study team are satisfied that they meet the  
16  
17 353 eligibility criteria, they will be invited to provide written informed consent with a delegated, trained  
18  
19 354 member of staff (Supplemental Material 1). In line with recommended practice (MRC tissue and  
20  
21 355 biological samples for use in research), participants will be asked to consent to gift their anonymised  
22  
23 356 samples for use in future studies and shared with research collaborators and stored for any future  
24  
25 357 commercial respiratory partnerships. This is outlined in the PIL and consent form.

#### 26 358 **Data Management and Participant Confidentiality**

27 359 Study data will be recorded directly into REDcap, an Electronic Data Capture (EDC) system (21). Any  
28  
29 360 additional information that needs recording but is not relevant for the case report form (CRF) will be  
30  
31 361 recorded on a separate paper source document. The electronic CRF (eCRF) must be completed by  
32  
33 362 designated and trained study personnel. Quality control will be performed on each eCRF. The  
34  
35 363 processing of eCRFs will include an audit trail, to include changes made, reason for change, date of  
36  
37 364 change and person making change.

38 365 Each participant will be assigned a unique, non-identifiable study number at recruitment for  
39  
40 366 anonymisation. Unlinked non-identifiable clinical data will be stored and analysed at the LSTM, MSD or  
41  
42 367 collaborating laboratories. Only authorised members of the clinical research team will be able to access  
43  
44 368 participant personal information which is directly relevant to the study. All electronic records containing  
45  
46 369 personal information will be stored in a password protected database on a password protected  
47  
48 370 computer. Paper documentation containing personal information will be kept in a locked filing cabinet  
49  
50 371 in a locked room. On completion of the study, the eCRF will be locked and source documents will be  
51  
52 372 photocopied and archived on paper and electronically in a secure database. This data will be stored for  
53  
54 373 a minimum of 25 years. We will publicise a de-identified data set to an appropriate data archive within  
55  
56 374 3 years from study completion. See Supplemental Material 2 for information on storage of biological  
57  
58 375 specimens.

#### 59 376 **Dissemination Policy**

60 377 The findings from this study will be disseminated amongst the scientific community. We intend to publish  
378  
379 378 our findings in peer reviewed scientific journals and present data at appropriate local, national and  
380  
381 379 international conferences. In addition, we will produce a report of our findings, which will be made  
382  
383 380 available to all participants. Authorship of the final trial report and subsequent publications will include  
384  
385 381 those who contribute to the design, delivery and analysis of the trial. Authorship will be defined on study  
386  
387 382 completion in line with International Committee of Medical Journal Editors guidelines (22).

### 383 **Patient and Public Involvement and Engagement**

384 This study is run in conjunction with the EHPC studies, which have been studying pneumococcal  
385 colonisation over the last 11 years. There are numerous opportunities for public and patient  
386 involvement: newsletters are sent out to all participants to inform them of the study results and further  
387 work, previous participants assist with recruitment events and social media accounts update followers  
388 about current studies and our ongoing work. For this study, we have asked participants from previous  
389 studies to review the Participant Information Leaflet and consent form, to ensure it is clear and easy to  
390 understand.

### 391 **ACKNOWLEDGEMENTS**

392 We would like to acknowledge the NIHR CRN North West Coast for providing clinical staff for this study.

393 We would like to acknowledge Andrea Gori and Robert S Hyderman for providing the SPN3 strain from  
394 Malawi. We would also like to acknowledge members of the DSMC/TSC: Rob Read, Neil French, Marc  
395 Henrion and Chris Chiu.

396 We would also like to acknowledge the respiratory consultants in the Liverpool University Hospitals  
397 NHS Foundation Trust who provide on-call cover for this study: Drs Kimberley Barber, Livingstone  
398 Chishimba, Paul Deegan, Justine Hadcroft, Gareth Jones, Patricia Yunger, Hassan Burhan and Seher  
399 Zaidi

### 400 **AUTHOR CONTRIBUTIONS**

401 Study design set up: PH, RR, MF, CS, AHW, DMF, AMC, KL, ML, AH, TKN, SBG

402 Statistics: ML

403 Ethics application: PH, KD, MF, AMC

404 Study coordination: PH, CS, AHW, MF, KD, AMC, AB, JB, HF

405 Clinical cover including on-call responsibility: KL, RR, PH, AMC, JB, HF, AB

406 Writing the protocol: PH, MF, RR, CS, KL, KD, AHW, EM, BU, DMF, AMC, ML

407 Bacterial selection, bacterial inoculum preparation: CS, AH, TKN, DES, SBG

408 Manuscript writing RH, RR, MF, CS, AMC, DMF

409 Manuscript review PH, RR, MF, CS, AMC, DMF, SBG, KL, AHW, AH, ML, AB, HF, KD, TKN, BU,  
410 SBG, DES

### 411 **Funding statement**

412 The study is supported in part by a research grant from Investigator-Initiated Studies Programme of  
413 Merck Sharp and Dohme LLC (MISP 61493). The opinions expressed in this paper are those of the  
414 authors and do not necessarily represent those of Merck Sharp and Dohme LLC.

### 415 **Competing interests statement**

416 Neither the CI nor any collaborator has any direct personal involvement in organisations sponsoring  
417 or funding the research that may give rise to a possible conflict of interest.

418

419 **REFERENCES**

- 420 1. Robinson RE, Mitsi E, Nikolaou E et al. Human Infection Challenge with Serotype 3  
421 Pneumococcus. *Am J Respir Crit Care Med*. 2022 Dec 1;206(11):1379-1392.
- 422 2. GLRI C. Estimates of the global, regional, and national morbidity, mortality, and aetiologies of  
423 lower respiratory infections in 195 countries, 1990-2016: a systematic analysis for the Global Burden  
424 of Disease Study 2016. *Lancet Infect Dis*. 2018;18(11):1191-210.
- 425 3. German EL, Solórzano C, Sunny S et al. Protective effect of PCV vaccine against  
426 experimental pneumococcal challenge in adults is primarily mediated by controlling colonisation  
427 density. *Vaccine*. 2019;37(30):3953-6.
- 428 4. Levine OS, O'Brien KL, Knoll M et al. Pneumococcal vaccination in developing countries.  
429 *Lancet*. 2006;367(9526):1880-2.
- 430 5. Oligbu G, Collins S, Djennad A et al. Effect of Pneumococcal Conjugate Vaccines on  
431 Pneumococcal Meningitis, England and Wales, July 1, 2000-June 30, 2016. *Emerg Infect Dis*.  
432 2019;25(9):1708-18.
- 433 6. de Miguel S, Domenech M, González-Camacho F et al. Nationwide Trends of Invasive  
434 Pneumococcal Disease in Spain From 2009 Through 2019 in Children and Adults During the  
435 Pneumococcal Conjugate Vaccine Era. *Clinical Infectious Diseases*. 2020.
- 436 7. Amin-Chowdhury Z, Collins S, Sheppard C et al. Characteristics of Invasive Pneumococcal  
437 Disease Caused by Emerging Serotypes After the Introduction of the 13-Valent Pneumococcal  
438 Conjugate Vaccine in England: A Prospective Observational Cohort Study, 2014-2018. *Clin Infect Dis*.  
439 2020;71(8):e235-e43.
- 440 8. Dagan R, Patterson S, Juergens C et al. Comparative Immunogenicity and Efficacy of 13-  
441 Valent and 7-Valent Pneumococcal Conjugate Vaccines in Reducing Nasopharyngeal Colonization: A  
442 Randomized Double-Blind Trial. *Clinical Infectious Diseases*. 2013;57(7):952-62.
- 443 9. Ferreira DM, Jambo KC, Gordon SB. Experimental human pneumococcal carriage models for  
444 vaccine research. *Trends Microbiol*. 2011;19(9):464-70.
- 445 10. Gritzfeld JF, Cremers AJ, Ferwerda G et al. Density and duration of experimental human  
446 pneumococcal carriage. *Clin Microbiol Infect*. 2014;20(12):O1145-51.
- 447 11. Gritzfeld JF, Wright AD, Collins AM et al. Experimental human pneumococcal carriage. *J Vis*  
448 *Exp*. 2013(72).
- 449 12. Jochems SP, de Ruiter K, Solórzano C et al. Innate and adaptive nasal mucosal immune  
450 responses following experimental human pneumococcal colonization. *J Clin Invest*.  
451 2019;129(10):4523-38.
- 452 13. Jochems SP, Marcon F, Carniel BF et al. Inflammation induced by influenza virus impairs  
453 human innate immune control of pneumococcus. *Nature Immunology*. 2018;19(12):1299-308.
- 454 14. Mitsi E, Carniel B, Reiné J et al. Nasal Pneumococcal Density Is Associated with  
455 Microaspiration and Heightened Human Alveolar Macrophage Responsiveness to Bacterial  
456 Pathogens. *Am J Respir Crit Care Med*. 2020;201(3):335-47.
- 457 15. Connor V, German E, Pojar S et al. Hands are vehicles for transmission of *Streptococcus*  
458 *pneumoniae* in novel controlled human infection study. *Eur Respir J*. 2018;52(4).
- 459 16. Musher DM. How contagious are common respiratory tract infections? *N Engl J Med*.  
460 2003;348(13):1256-66.
- 461 17. Weiser JN. The pneumococcus: why a commensal misbehaves. *J Mol Med (Berl)*.  
462 2010;88(2):97-102.
- 463 18. Morton B, Burr S, Chikaonda T et al. A feasibility study of controlled human infection with  
464 *Streptococcus pneumoniae* in Malawi. *EBioMedicine*. 2021 Oct;72:103579.
- 465 19. Chan A-W, Tetzlaff JM, Gøtzsche PC et al. SPIRIT 2013 Explanation and Elaboration: Guidance  
466 for protocols of clinical trials. *BMJ*. 2013;346:e7586
- 467 20. National Institute of Allergy and Infectious Diseases. Division of AIDS Table for Grading the  
468 Severity of Adult and Pediatric Adverse Events. July 2021. Available from:  
469 <https://rsc.niaid.nih.gov/sites/default/files/daidsgradingcorrectedv21.pdf>
- 470 21. PA Harris, R Taylor, R Thielke et al. Research electronic data capture (REDCap) – A  
471 metadata-driven methodology and workflow process for providing translational research informatics  
472 support, *J Biomed Inform*. 2009 Apr;42(2):377-81.

1  
2  
3  
4  
5  
6  
7  
8  
9  
10  
11  
12  
13  
14  
15  
16  
17  
18  
19  
20  
21  
22  
23  
24  
25  
26  
27  
28  
29  
30  
31  
32  
33  
34  
35  
36  
37  
38  
39  
40  
41  
42  
43  
44  
45  
46  
47  
48  
49  
50  
51  
52  
53  
54  
55  
56  
57  
58  
59  
60

473 22. International Committee of Medical Journal Editors. Recommendations for the Conduct,  
474 Reporting, Editing, and Publication of Scholarly Work in Medical Journals. 2022 May.

475

476 Word Count (excluding abstract, article summary, tables and references) = 4340 words

477 Abstract word count: 300 words

For peer review only

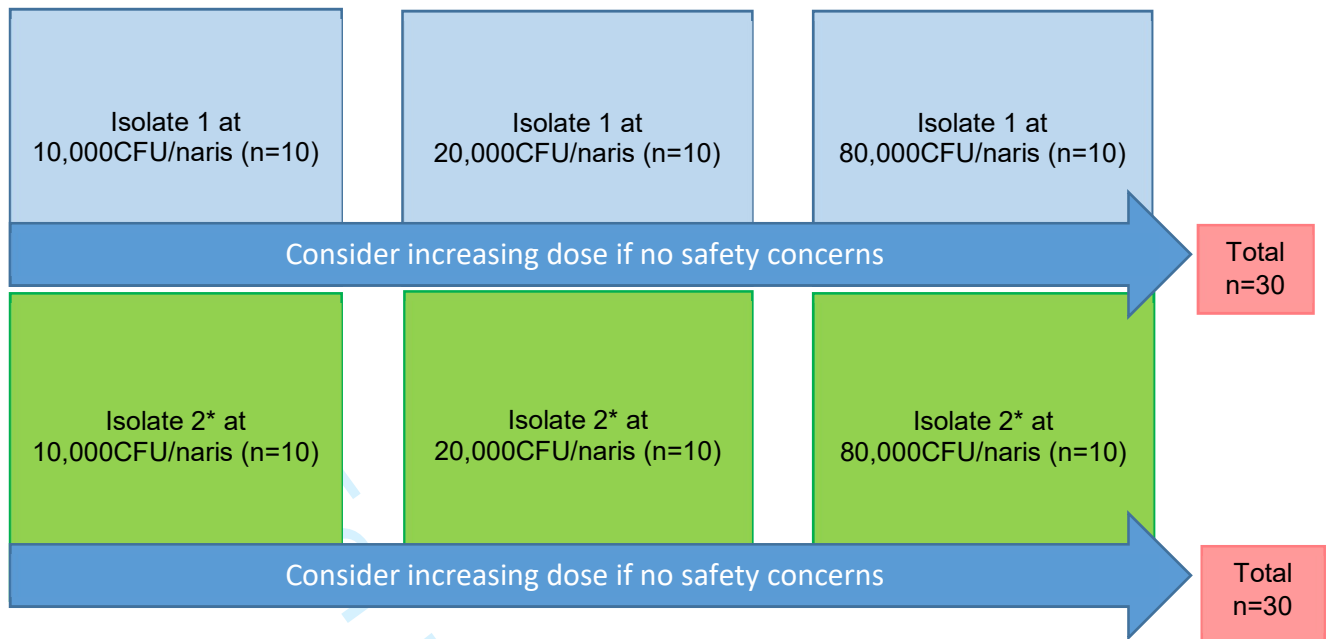

The dose may be escalated before a cohort of n=10 is inoculated, and subsequent escalated doses may be omitted if the colonisation rates are low. This is in the interest of not inoculating participants if it could be futile, and will be at the discretion of the CI

Reproducibility study with selected dose and isolate as decided by Trial Steering Committee  
(n=33)

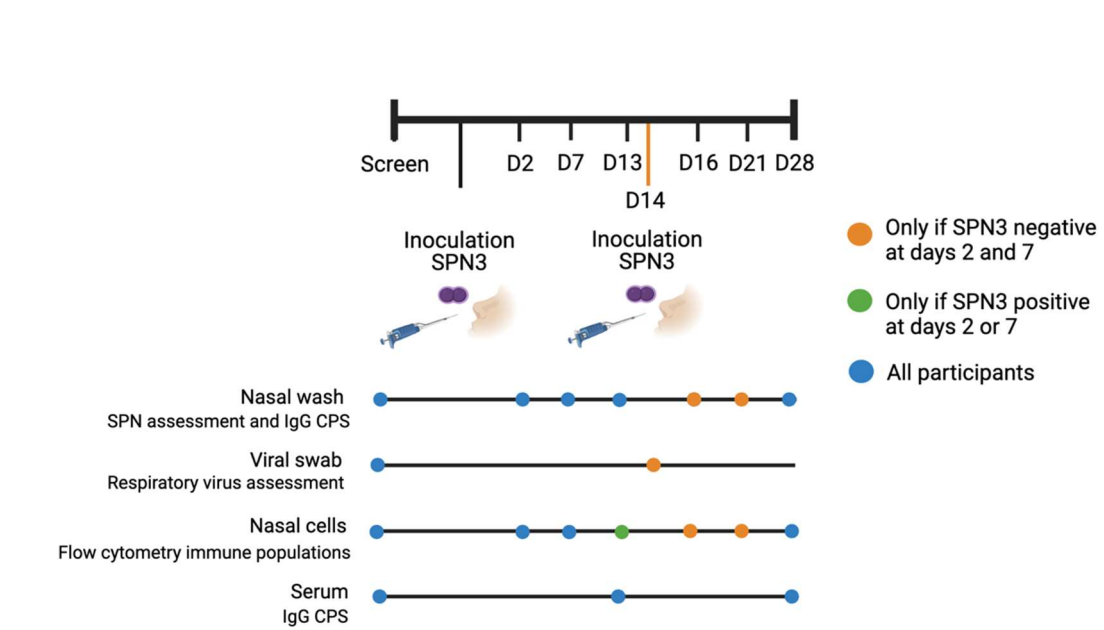

A)

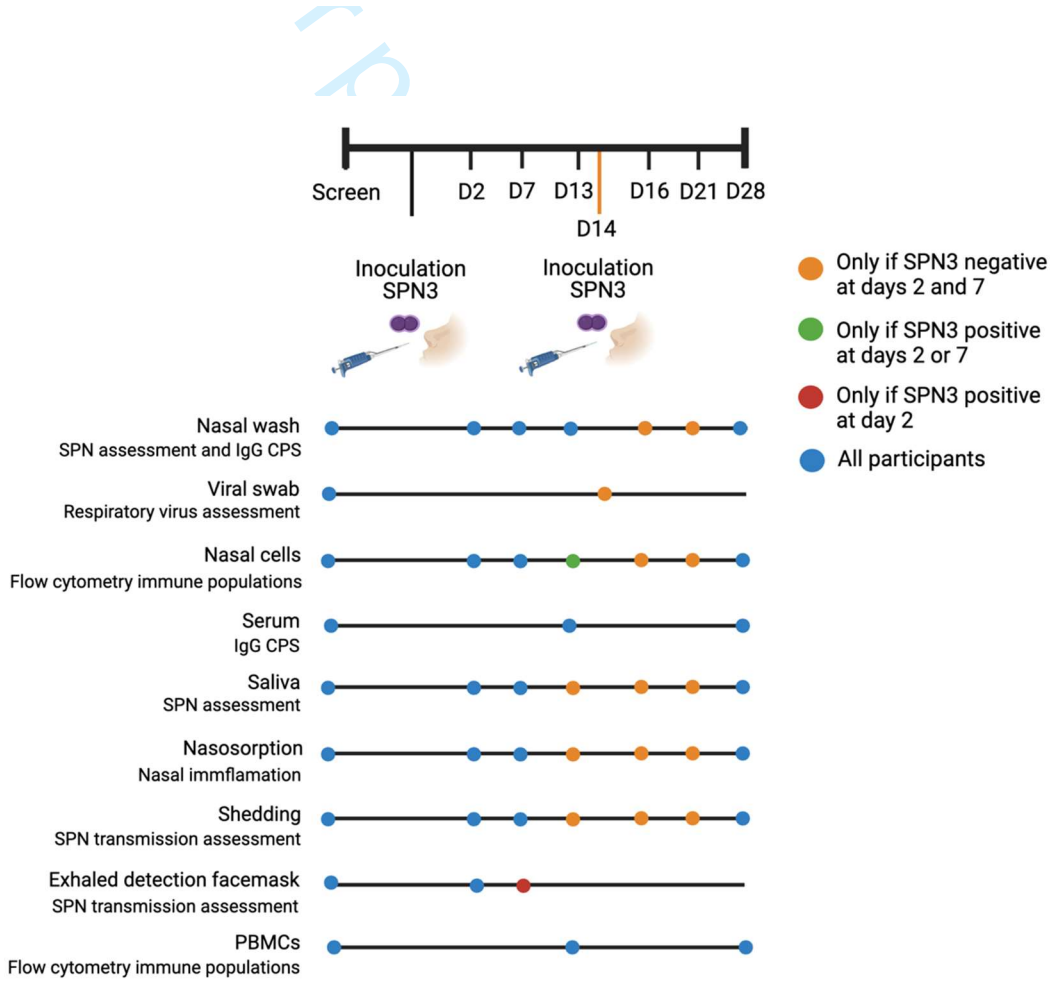

B)

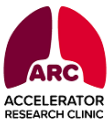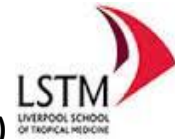

## Experimental Human Pneumococcal Challenge Model (EHPC)

### Participant Information Leaflet (PIL)

## Challenge 3 Study:

This information leaflet tells you how you could take part in our research. Please ask a member of the team if you have questions. You may want to talk to other people about the study: please do so. Take your time to decide if you want to be involved.

#### What is the purpose of the study?

We are studying a bacteria called pneumococcus which are often found in the noses of healthy adults and children without causing any symptoms or disease. However, in some people, such as older age, chronically ill adults or very young children, it is more likely to cause illness. Mild infections with pneumococcus are very common, such as ear infections in children. Less frequently, the bacteria can infect the lung (causing pneumonia), the brain (causing meningitis) or the blood (causing sepsis). These more serious illnesses are very uncommon in healthy adults. It is thought that small numbers of this bacteria in the nose ("nasal colonisation") may actually protect against pneumococcal disease such as pneumonia.

The 'Experimental Human Pneumococcal challenge' (EHPC) model is a way of putting drops of bacteria into the nose. We have studied this model of putting bacteria in the nose safely in over 1500 volunteers over the past decade with no serious side effects. We will now use a different strain of the bacteria that is commonly found in the community, called SPN3, in this model.

The aim of this study is to determine how much pneumococcus is needed to achieve nasal colonisation and how long the bacteria live in the nose for before it is cleared by natural immunity. By doing this, we will then be able to test how well

future vaccines may work to prevent pneumococcal colonisation and ultimately pneumococcal infections such as pneumonia.

#### Do I have to take part?

No. Taking part in this study is voluntary.

#### Why have I been asked to take part?

We are looking for up to 117 participants aged 18-50 years old and that are fit and healthy. If we find any reason that you or your close contacts may be at higher risk of infection, then we will not ask you to take part.

#### The main reasons that you would not be able to take part:

- Current daily smoking (includes e-cigarettes) or significant history of smoking
- Currently involved in another study or involvement in EHPC studies in past year (3 years if involving SPN3)
- Received a pneumococcal vaccine (routine in UK if born since 2005)
- Allergy to Penicillin/ Amoxicillin
- Increased risk of infection due to chronic condition or medication
- Long term use of antibiotics
- Pregnancy or trying to conceive
- History of drug or alcohol abuse
- Directly caring for someone who has lower immune levels (patients, children under 5, the elderly) without personal protective equipment
- Overseas travel planned in follow up period



## Experimental Human Pneumococcal Challenge Model (EHPC)

### What happens if I choose to take part?

If you choose to take part in this study and the research team agrees that you are eligible, you will be asked to sign the consent form.

The study will involve 8-9 clinic visits over approximately 4-5 weeks.

### What samples do you take and what are the risks?

**Nasal wash:** We gently squirt a little salty water into your nose. After a few seconds the water runs out into a sample bowl. This will tell us about the bacteria in your nose and your immune response.

*Risk: may swallow some salty water, temporary discomfort.*

**Throat swab(s):** We take a small cotton swab and wipe the back of your throat in a circular motion. This is used to detect bacteria and viruses in your throat.

*Risk: might make you gag a little.*

**Nasosorption:** To collect cells from your nose we place a small piece of paper into your nostril for two minutes.

*Risk: Little if any discomfort*

**Nasal cells:** We insert a very small plastic spoon (like a tooth pick) to collect cells from inside the nose. We will perform this twice on each nostril.

*Risk: Temporary discomfort, eyes watering, spots of blood from the scrape.*

**Blood samples:** We take a blood sample from a vein in your arm (using a needle). We will take up to 80mL (about the same as 8 tablespoons) during a visit. This amount of blood is safe to give, and your body will replace this blood quickly.

*Risk: some people may feel faint or experience bruising.*

**Shedding:** We use gentle methods to find out if bacteria move from the nose to the hand. For example a swab of your hand after rubbing your nose or coughing onto a plate that is used to grow bacteria.

**Exhaled Detection Facemask:** You wear a facemask with a special filter for 15 minutes

*Risk: Can feel claustrophobic*

**Saliva:** We will ask you to spit into a tube to provide approx 1ml.

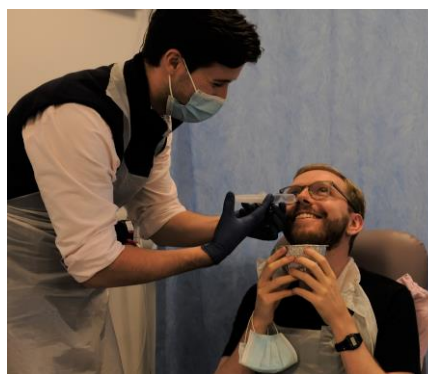

Fig 1. Nasal Wash

The risks that you should consider *before* participation in this study are the risks associated with having blood taken, nasal sampling as listed above and inoculation with live bacteria.

**Inoculation with pneumococcal bacteria:** Because the bacteria are alive, there is a very small risk of infection to you or your close contacts. There is a low risk of middle ear infection and very low risk of sinusitis, pneumonia, meningitis or sepsis. The study is designed to ensure any risk is minimal and we do not expect anyone to develop an infection; we choose participants carefully and monitor them closely. We have experience of using this model safely in more than 1500 healthy participants with no serious side effects. We provide a safety pack as described above and access to the research team by phone 24/7. We give you a separate leaflet which explains the

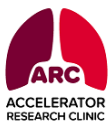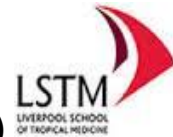

## Experimental Human Pneumococcal Challenge Model (EHPC)

safety precautions and what to do if you feel unwell.

- A course of antibiotics to keep with you in case you are unwell
- A thermometer to check your temperature at home
- A safety information sheet
- A study contact card
- A symptom log

### What will happen at each visit?

This study involves 6-9 visits to the research clinic. Each appointment takes between 10 minutes up to a maximum of 60 minutes.

#### Consent

A member of the research team will discuss the study involvement with you, this may be done as a group presentation. You will then have the opportunity to ask questions and discuss the study with the researcher in private. If you choose to take part in the study, you will be asked to complete a questionnaire to demonstrate that you understand the study involvement before signing a consent form. We will inform your GP that you are taking part in the study.

#### Screening

This will take approximately 30 minutes. We will ask routine questions about your medical health and we will listen to your heart and lungs to make sure you are fit and well. At this visit, a number of samples will be taken which may include throat swabs (including a COVID-19 test), nasal wash, bloods, nasal scrapes, nasosorption and shedding samples.

#### Inoculation Visit

We use a dropper (pipette) to put a few drops of water containing a small number of pneumococcal bacteria into each nostril (inoculation). You will lie down in the clinic for 15 minutes after the procedure. Usually participants have no symptoms afterwards. There will be a doctor or nurse available by telephone 24 hours a day, 7 days a week to answer questions. We will give you a safety pack to keep with you throughout the study, this includes:

We will ask that you inform us of your temperature and symptoms daily for the next 3-5 days.

#### Clinic appointment visits

At each visit, a number of samples will be taken which may include throat swab(s), nasal wash, bloods, nasosorption, shedding, saliva and nasal cell samples.

#### End of the study

Participants that are carriers of pneumococcal bacteria at any time point, who do not go on to have negative samples, will be asked to take the antibiotics (amoxicillin 500mg 3 times per day for 5 days) from the safety pack to clear/ reduce the amount of the pneumococcus in the nose.

#### Appointment Flow Chart

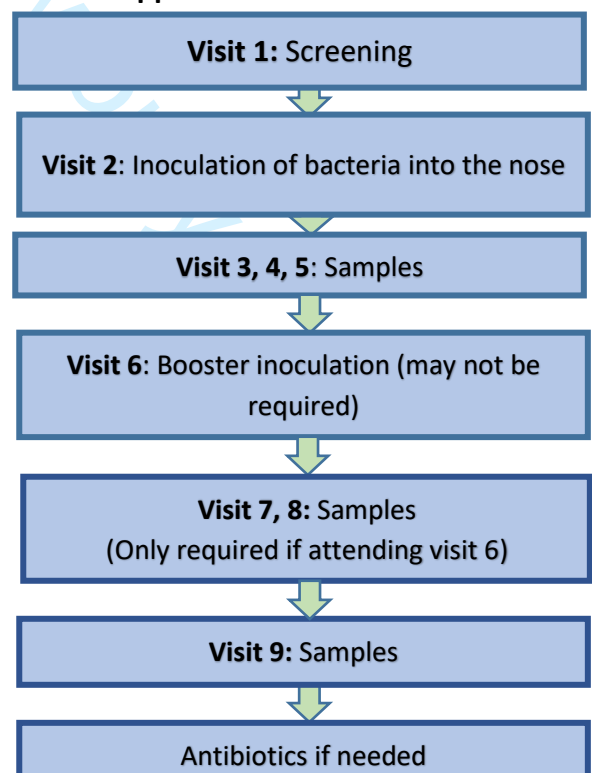

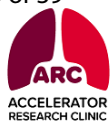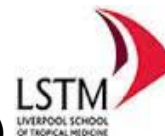

## Experimental Human Pneumococcal Challenge Model (EHPC)

### What are the benefits of taking part?

You will be a valuable part of a research study that we hope will eventually lead to the development of new methods to prevent respiratory infections through vaccination. You will not gain any direct benefit other than a health check.

### What if there is a problem?

You can contact the research team 24 hours a day by phone to answer any questions. Any medical care you need will be provided by the NHS.

### What about the risk of COVID-19?

The bacteria in this study does not increase your risk of developing COVID-19 infection. To reduce the risk of COVID-19 when attending for your clinic visits the latest UK Health Security Agency guidance for 'infection prevention and control for COVID-19' will be strictly followed and you will be advised of any specific measures to be taken closer to your appointment. A swab to check for COVID-19 infection may be performed at your appointments. If you were to develop symptoms that are suggestive of COVID-19 infection (fever, cough, shortness of breath, loss of sense of smell or taste) you will be advised to follow the latest UKHSA guidance with regards to self-isolation and if required seek urgent medical attention via normal routes of healthcare.

### What if I wish to complain?

If you wish to complain about any aspect of the study, you can contact the study doctor or nurse. You can also contact the sponsor by email on [lstmgov@lstmed.ac.uk](mailto:lstmgov@lstmed.ac.uk) or telephone on 0151 702 9396. Complaining will not affect the medical care you receive now or in the future.

The study is sponsored by the Liverpool School of Tropical Medicine (LSTM) and is covered by Clinical Trial Insurance.

### How much will I get paid?

The money you are paid is compensation for inconvenience, loss of income, and possible discomfort. Payments are as seen in the table below.

You will be paid between £170 and £285 for taking part in this study depending on how many visits are required and how many samples are taken on each visit

\*these visits may not be required

| Visit                       | Payment     |
|-----------------------------|-------------|
| Screen/Re-screen            | £40         |
| Inoculation                 | £40         |
| Day 2                       | £20-£35     |
| Day 7                       | £20-£35     |
| Day 13                      | £20-£30     |
| Booster inoculation Day 14* | £40*        |
| Day 16*                     | £20-£25*    |
| Day 21*                     | £20-£25*    |
| Day 28                      | £25-£30     |
| <b>Minimum total:</b>       | <b>£170</b> |
| <b>Maximum Total</b>        | <b>£285</b> |

### What if I change my mind, or want to stop?

If you do start the study, you are free to stop at any time without giving a reason. If you decide not to take part, or to withdraw from the study, this will have no effect on your future health care.

If you decide to stop, or if you lose capacity to consent during the study, we will continue to use the samples that have already been taken and information that we have already collected unless you ask us not to. You will be paid for the visits completed up to that point.

The study team may stop your involvement in the study for safety reasons.



## Experimental Human Pneumococcal Challenge Model (EHPC)

### Will my details be kept confidential?

Yes. For safety, we collect contact details and information about your medical history before you take part.

We will ask your permission to inform your GP that you are taking part in the study as this may be relevant to your medical care outside of the study.

We do not expect to find anything which would affect your health care. If we do, we will let you and your GP know about it.

We will also collect information that allows us to understand more about the samples, for example, your age or sex. This will be stored on a password protected database and/or in a locked cupboard. This data may be used by LSTM researchers who need to contact you or record relevant information about the study.

Your medical notes and research data may be viewed by regulatory teams who assess the quality of the research. This is to ensure that it is conducted in accordance with Good Clinical Practice guidelines.

All data will be collected and stored at the LSTM for a minimum period of 25 years. This includes

data such as your name and contact details. We use this to check if participants have already taken part in our research. We will also send newsletters and inform you about future studies.

You can find out more about how we use your information by contacting [dataprotection@lstmed.ac.uk](mailto:dataprotection@lstmed.ac.uk).

### What will happen to my samples?

The samples taken during this study will be processed and stored in the LSTM. All samples will be anonymised at the point of sampling, the people analysing the samples and data will not have access to your personal information. The samples that you give will be gifted for future use in respiratory/infection research and stored in a research tissue bank after the study has closed. The stored samples will be analysed as and when new technology becomes available or when new scientific questions arise relating to protection and susceptibility of respiratory disease. Samples may be sent to national and international collaborating laboratories for their expertise. All identifiable information will be removed.

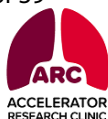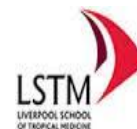

## Experimental Human Pneumococcal Challenge Model (EHPC)

### Contact details

General questions: please contact the research team on

**07740 410 290**

during normal working hours.

Web site: <https://www.lstmed.ac.uk/arc-volunteer-database>

**Emergency contact details at any time day or night: Mobile: 07912 053 981**

The Chief Investigator for this study is **Dr Andrea Collins**. You may contact her at the Liverpool School of Tropical Medicine, Liverpool Life Sciences Accelerator Building, 1 Daulby Street, Liverpool, L7 8XZ, UK. Telephone: **0151 702 9439**.

This research is sponsored by the Liverpool School of Tropical Medicine. It is funded by Merck. The research has been reviewed for scientific content by an external panel. The National Research Ethics Service Committee Liverpool Central has reviewed the study and given approval for it to take place.

**Data protection:** *If you withdraw from the study, we will keep the information about you that we have already obtained. To safeguard your rights, we will use the minimum personally-identifiable information possible.*

**Data access:** *The only people in LSTM who will have access to information that identifies you will be people who need to contact you to regarding your participation in the research or audit the data collection process. LSTM will use your name, NHS number and contact details to contact you about the research study, and make sure that relevant information about the study is recorded for your care, and to oversee the quality of the study. Individuals from LSTM and regulatory organisations may look at your medical and research records to check the accuracy of the research study. LSTM (research site) will pass these details to LSTM (sponsor) along with the information collected from you and your medical records. The people who analyse the information will not be able to identify you and will not be able to find out your name, NHS number or contact details.*

*LSTM (research site) will keep identifiable information about you from this study for a minimum of 5 years after the study has finished.*

**Information for research:** *The information will only be used for the purpose of research and cannot be used to contact you or to affect your health care. It will not be used to make decisions about future services available to you, such as insurance.*



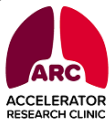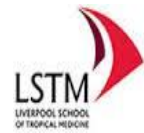

## Experimental Human Pneumococcal Challenge Model (EHPC)

Copies: 1 for participant, original for site file and one scanned or filed in research case notes

For peer review only

## Supplemental Material 2. Biological Specimens

Biological samples are collected from all participants, transferred to the laboratory with an accompanying inventory form and stored, following local standard operating procedures.

The samples are “anonymised” with a participant number at the point of collection. Anonymised samples may be sent to national and international collaborators for further analysis, as detailed in the participant consent form. LSTM may store samples for up to 25yrs. After this time, the remaining samples will be transferred to a research tissue bank (LSTM).

For peer review only



# Reporting checklist for protocol of a clinical trial.

Based on the SPIRIT guidelines.

## Instructions to authors

Complete this checklist by entering the page numbers from your manuscript where readers will find each of the items listed below.

Your article may not currently address all the items on the checklist. Please modify your text to include the missing information. If you are certain that an item does not apply, please write "n/a" and provide a short explanation.

Upload your completed checklist as an extra file when you submit to a journal.

In your methods section, say that you used the SPIRIT reporting guidelines, and cite them as:

Chan A-W, Tetzlaff JM, Gøtzsche PC, Altman DG, Mann H, Berlin J, Dickersin K, Hróbjartsson A, Schulz KF, Parulekar WR, Krleža-Jerić K, Laupacis A, Moher D. SPIRIT 2013 Explanation and Elaboration: Guidance for protocols of clinical trials. *BMJ*. 2013;346:e7586

|                                   |                     |                                                                                                              | Page   |
|-----------------------------------|---------------------|--------------------------------------------------------------------------------------------------------------|--------|
|                                   |                     | Reporting Item                                                                                               | Number |
| <b>Administrative information</b> |                     |                                                                                                              |        |
| Title                             | <a href="#">#1</a>  | Descriptive title identifying the study design, population, interventions, and, if applicable, trial acronym | 1      |
| Trial registration                | <a href="#">#2a</a> | Trial identifier and registry name. If not yet registered,                                                   | 2      |

|    |                     |                                                                             |                |
|----|---------------------|-----------------------------------------------------------------------------|----------------|
| 1  |                     | name of intended registry                                                   |                |
| 2  |                     |                                                                             |                |
| 3  |                     |                                                                             |                |
| 4  | Trial registration: | <a href="#">#2b</a> All items from the World Health Organization Trial      | 1, 2, 4, 6, 7, |
| 5  |                     |                                                                             |                |
| 6  | data set            | Registration Data Set                                                       | 8, 9, 12, 15,  |
| 7  |                     |                                                                             |                |
| 8  |                     |                                                                             | 16             |
| 9  |                     |                                                                             |                |
| 10 |                     |                                                                             |                |
| 11 | Protocol version    | <a href="#">#3</a> Date and version identifier                              | 2              |
| 12 |                     |                                                                             |                |
| 13 |                     |                                                                             |                |
| 14 | Funding             | <a href="#">#4</a> Sources and types of financial, material, and other      | 18             |
| 15 |                     |                                                                             |                |
| 16 |                     | support                                                                     |                |
| 17 |                     |                                                                             |                |
| 18 |                     |                                                                             |                |
| 19 | Roles and           | <a href="#">#5a</a> Names, affiliations, and roles of protocol contributors | Supp for       |
| 20 |                     |                                                                             |                |
| 21 | responsibilities:   |                                                                             | editors        |
| 22 |                     |                                                                             |                |
| 23 | contributorship     |                                                                             |                |
| 24 |                     |                                                                             |                |
| 25 |                     |                                                                             |                |
| 26 |                     |                                                                             |                |
| 27 | Roles and           | <a href="#">#5b</a> Name and contact information for the trial sponsor      | 1              |
| 28 |                     |                                                                             |                |
| 29 | responsibilities:   |                                                                             |                |
| 30 |                     |                                                                             |                |
| 31 | sponsor contact     |                                                                             |                |
| 32 |                     |                                                                             |                |
| 33 | information         |                                                                             |                |
| 34 |                     |                                                                             |                |
| 35 |                     |                                                                             |                |
| 36 |                     |                                                                             |                |
| 37 | Roles and           | <a href="#">#5c</a> Role of study sponsor and funders, if any, in study     | Supp for       |
| 38 |                     |                                                                             |                |
| 39 | responsibilities:   | design; collection, management, analysis, and                               | editors        |
| 40 |                     |                                                                             |                |
| 41 | sponsor and funder  | interpretation of data; writing of the report; and the                      |                |
| 42 |                     |                                                                             |                |
| 43 |                     | decision to submit the report for publication, including                    |                |
| 44 |                     |                                                                             |                |
| 45 |                     | whether they will have ultimate authority over any of                       |                |
| 46 |                     |                                                                             |                |
| 47 |                     | these activities                                                            |                |
| 48 |                     |                                                                             |                |
| 49 |                     |                                                                             |                |
| 50 |                     |                                                                             |                |
| 51 | Roles and           | <a href="#">#5d</a> Composition, roles, and responsibilities of the         | Supp for       |
| 52 |                     |                                                                             |                |
| 53 | responsibilities:   | coordinating centre, steering committee, endpoint                           | editors        |
| 54 |                     |                                                                             |                |
| 55 | committees          | adjudication committee, data management team, and                           |                |
| 56 |                     |                                                                             |                |
| 57 |                     |                                                                             |                |
| 58 |                     |                                                                             |                |
| 59 |                     |                                                                             |                |
| 60 |                     |                                                                             |                |

other individuals or groups overseeing the trial, if applicable (see Item 21a for data monitoring committee)

## Introduction

|                                                  |                     |                                                                                                                                                                                                            |                          |
|--------------------------------------------------|---------------------|------------------------------------------------------------------------------------------------------------------------------------------------------------------------------------------------------------|--------------------------|
| Background and rationale                         | <a href="#">#6a</a> | Description of research question and justification for undertaking the trial, including summary of relevant studies (published and unpublished) examining benefits and harms for each intervention         | 4-6                      |
| Background and rationale: choice of comparators  | <a href="#">#6b</a> | Explanation for choice of comparators                                                                                                                                                                      | N/A – no comparator used |
| Objectives                                       | <a href="#">#7</a>  | Specific objectives or hypotheses                                                                                                                                                                          | 6-8                      |
| Trial design                                     | <a href="#">#8</a>  | Description of trial design including type of trial (eg, parallel group, crossover, factorial, single group), allocation ratio, and framework (eg, superiority, equivalence, non-inferiority, exploratory) | 5                        |
| <b>Methods:</b>                                  |                     |                                                                                                                                                                                                            |                          |
| <b>Participants, interventions, and outcomes</b> |                     |                                                                                                                                                                                                            |                          |
| Study setting                                    | <a href="#">#9</a>  | Description of study settings (eg, community clinic, academic hospital) and list of countries where data will be collected. Reference to where list of study sites can                                     | 6                        |

|    |                      |                                                                             |       |
|----|----------------------|-----------------------------------------------------------------------------|-------|
| 1  |                      | be obtained                                                                 |       |
| 2  |                      |                                                                             |       |
| 3  |                      |                                                                             |       |
| 4  | Eligibility criteria | <a href="#">#10</a> Inclusion and exclusion criteria for participants. If   | 8-10  |
| 5  |                      | applicable, eligibility criteria for study centres and                      |       |
| 6  |                      | individuals who will perform the interventions (eg,                         |       |
| 7  |                      | surgeons, psychotherapists)                                                 |       |
| 8  |                      |                                                                             |       |
| 9  |                      |                                                                             |       |
| 10 |                      |                                                                             |       |
| 11 |                      |                                                                             |       |
| 12 |                      |                                                                             |       |
| 13 | Interventions:       | <a href="#">#11a</a> Interventions for each group with sufficient detail to | 10-11 |
| 14 | description          | allow replication, including how and when they will be                      |       |
| 15 |                      | administered                                                                |       |
| 16 |                      |                                                                             |       |
| 17 |                      |                                                                             |       |
| 18 |                      |                                                                             |       |
| 19 |                      |                                                                             |       |
| 20 |                      |                                                                             |       |
| 21 | Interventions:       | <a href="#">#11b</a> Criteria for discontinuing or modifying allocated      | 10    |
| 22 | modifications        | interventions for a given trial participant (eg, drug dose                  |       |
| 23 |                      | change in response to harms, participant request, or                        |       |
| 24 |                      | improving / worsening disease)                                              |       |
| 25 |                      |                                                                             |       |
| 26 |                      |                                                                             |       |
| 27 |                      |                                                                             |       |
| 28 |                      |                                                                             |       |
| 29 |                      |                                                                             |       |
| 30 |                      |                                                                             |       |
| 31 | Interventions:       | <a href="#">#11c</a> Strategies to improve adherence to intervention        | 12    |
| 32 | adherence            | protocols, and any procedures for monitoring                                |       |
| 33 |                      | adherence (eg, drug tablet return; laboratory tests)                        |       |
| 34 |                      |                                                                             |       |
| 35 |                      |                                                                             |       |
| 36 |                      |                                                                             |       |
| 37 |                      |                                                                             |       |
| 38 |                      |                                                                             |       |
| 39 | Interventions:       | <a href="#">#11d</a> Relevant concomitant care and interventions that are   | 9     |
| 40 | concomitant care     | permitted or prohibited during the trial                                    |       |
| 41 |                      |                                                                             |       |
| 42 |                      |                                                                             |       |
| 43 |                      |                                                                             |       |
| 44 | Outcomes             | <a href="#">#12</a> Primary, secondary, and other outcomes, including the   | 6-8   |
| 45 |                      | specific measurement variable (eg, systolic blood                           |       |
| 46 |                      | pressure), analysis metric (eg, change from baseline,                       |       |
| 47 |                      | final value, time to event), method of aggregation (eg,                     |       |
| 48 |                      | median, proportion), and time point for each outcome.                       |       |
| 49 |                      | Explanation of the clinical relevance of chosen efficacy                    |       |
| 50 |                      | and harm outcomes is strongly recommended                                   |       |
| 51 |                      |                                                                             |       |
| 52 |                      |                                                                             |       |
| 53 |                      |                                                                             |       |
| 54 |                      |                                                                             |       |
| 55 |                      |                                                                             |       |
| 56 |                      |                                                                             |       |
| 57 |                      |                                                                             |       |
| 58 |                      |                                                                             |       |
| 59 |                      |                                                                             |       |
| 60 |                      |                                                                             |       |

|    |                           |                      |                                                           |               |
|----|---------------------------|----------------------|-----------------------------------------------------------|---------------|
| 1  | Participant timeline      | <a href="#">#13</a>  | Time schedule of enrolment, interventions (including      | 10-11,        |
| 2  |                           |                      | any run-ins and washouts), assessments, and visits for    | Figures1-3    |
| 3  |                           |                      | participants. A schematic diagram is highly               |               |
| 4  |                           |                      | recommended (see Figure)                                  |               |
| 5  |                           |                      |                                                           |               |
| 6  |                           |                      |                                                           |               |
| 7  |                           |                      |                                                           |               |
| 8  |                           |                      |                                                           |               |
| 9  |                           |                      |                                                           |               |
| 10 |                           |                      |                                                           |               |
| 11 | Sample size               | <a href="#">#14</a>  | Estimated number of participants needed to achieve        | 12-13         |
| 12 |                           |                      | study objectives and how it was determined, including     |               |
| 13 |                           |                      | clinical and statistical assumptions supporting any       |               |
| 14 |                           |                      | sample size calculations                                  |               |
| 15 |                           |                      |                                                           |               |
| 16 |                           |                      |                                                           |               |
| 17 |                           |                      |                                                           |               |
| 18 |                           |                      |                                                           |               |
| 19 |                           |                      |                                                           |               |
| 20 |                           |                      |                                                           |               |
| 21 | Recruitment               | <a href="#">#15</a>  | Strategies for achieving adequate participant enrolment   | 10            |
| 22 |                           |                      | to reach target sample size                               |               |
| 23 |                           |                      |                                                           |               |
| 24 |                           |                      |                                                           |               |
| 25 |                           |                      |                                                           |               |
| 26 | <b>Methods:</b>           |                      |                                                           |               |
| 27 |                           |                      |                                                           |               |
| 28 | <b>Assignment of</b>      |                      |                                                           |               |
| 29 | <b>interventions (for</b> |                      |                                                           |               |
| 30 | <b>controlled trials)</b> |                      |                                                           |               |
| 31 |                           |                      |                                                           |               |
| 32 |                           |                      |                                                           |               |
| 33 |                           |                      |                                                           |               |
| 34 |                           |                      |                                                           |               |
| 35 |                           |                      |                                                           |               |
| 36 | Allocation: sequence      | <a href="#">#16a</a> | Method of generating the allocation sequence (eg,         | N/A – no      |
| 37 | generation                |                      | computer-generated random numbers), and list of any       | blinding used |
| 38 |                           |                      | factors for stratification. To reduce predictability of a |               |
| 39 |                           |                      | random sequence, details of any planned restriction       |               |
| 40 |                           |                      | (eg, blocking) should be provided in a separate           |               |
| 41 |                           |                      | document that is unavailable to those who enrol           |               |
| 42 |                           |                      | participants or assign interventions                      |               |
| 43 |                           |                      |                                                           |               |
| 44 |                           |                      |                                                           |               |
| 45 |                           |                      |                                                           |               |
| 46 |                           |                      |                                                           |               |
| 47 |                           |                      |                                                           |               |
| 48 |                           |                      |                                                           |               |
| 49 |                           |                      |                                                           |               |
| 50 |                           |                      |                                                           |               |
| 51 |                           |                      |                                                           |               |
| 52 |                           |                      |                                                           |               |
| 53 | Allocation                | <a href="#">#16b</a> | Mechanism of implementing the allocation sequence         | N/A – no      |
| 54 | concealment               |                      | (eg, central telephone; sequentially numbered, opaque,    | blinding used |
| 55 |                           |                      | sealed envelopes), describing any steps to conceal the    |               |
| 56 |                           |                      |                                                           |               |
| 57 |                           |                      |                                                           |               |
| 58 |                           |                      |                                                           |               |
| 59 |                           |                      |                                                           |               |
| 60 |                           |                      |                                                           |               |

|    |                        |                                                                            |               |
|----|------------------------|----------------------------------------------------------------------------|---------------|
| 1  |                        | sequence until interventions are assigned                                  |               |
| 2  |                        |                                                                            |               |
| 3  |                        |                                                                            |               |
| 4  | Allocation:            | <a href="#">#16c</a> Who will generate the allocation sequence, who will   | N/A – no      |
| 5  |                        |                                                                            |               |
| 6  | implementation         | enrol participants, and who will assign participants to                    | blinding used |
| 7  |                        |                                                                            |               |
| 8  |                        | interventions                                                              |               |
| 9  |                        |                                                                            |               |
| 10 |                        |                                                                            |               |
| 11 | Blinding (masking)     | <a href="#">#17a</a> Who will be blinded after assignment to interventions | N/A – no      |
| 12 |                        |                                                                            |               |
| 13 |                        | (eg, trial participants, care providers, outcome                           | blinding used |
| 14 |                        |                                                                            |               |
| 15 |                        | assessors, data analysts), and how                                         |               |
| 16 |                        |                                                                            |               |
| 17 |                        |                                                                            |               |
| 18 |                        |                                                                            |               |
| 19 | Blinding (masking):    | <a href="#">#17b</a> If blinded, circumstances under which unblinding is   | N/A – no      |
| 20 |                        |                                                                            |               |
| 21 | emergency              | permissible, and procedure for revealing a participant's                   | blinding used |
| 22 |                        |                                                                            |               |
| 23 | unblinding             | allocated intervention during the trial                                    |               |
| 24 |                        |                                                                            |               |
| 25 |                        |                                                                            |               |
| 26 | <b>Methods: Data</b>   |                                                                            |               |
| 27 |                        |                                                                            |               |
| 28 | <b>collection,</b>     |                                                                            |               |
| 29 |                        |                                                                            |               |
| 30 | <b>management, and</b> |                                                                            |               |
| 31 |                        |                                                                            |               |
| 32 | <b>analysis</b>        |                                                                            |               |
| 33 |                        |                                                                            |               |
| 34 |                        |                                                                            |               |
| 35 |                        |                                                                            |               |
| 36 | Data collection plan   | <a href="#">#18a</a> Plans for assessment and collection of outcome,       | 12            |
| 37 |                        |                                                                            |               |
| 38 |                        | baseline, and other trial data, including any related                      |               |
| 39 |                        |                                                                            |               |
| 40 |                        | processes to promote data quality (eg, duplicate                           |               |
| 41 |                        |                                                                            |               |
| 42 |                        | measurements, training of assessors) and a description                     |               |
| 43 |                        |                                                                            |               |
| 44 |                        | of study instruments (eg, questionnaires, laboratory                       |               |
| 45 |                        |                                                                            |               |
| 46 |                        | tests) along with their reliability and validity, if known.                |               |
| 47 |                        |                                                                            |               |
| 48 |                        | Reference to where data collection forms can be found,                     |               |
| 49 |                        |                                                                            |               |
| 50 |                        | if not in the protocol                                                     |               |
| 51 |                        |                                                                            |               |
| 52 |                        |                                                                            |               |
| 53 |                        |                                                                            |               |
| 54 |                        |                                                                            |               |
| 55 | Data collection plan:  | <a href="#">#18b</a> Plans to promote participant retention and complete   | 12            |
| 56 |                        |                                                                            |               |
| 57 | retention              | follow-up, including list of any outcome data to be                        |               |
| 58 |                        |                                                                            |               |
| 59 |                        |                                                                            |               |
| 60 |                        |                                                                            |               |

|    |                            |                                                                             |          |
|----|----------------------------|-----------------------------------------------------------------------------|----------|
| 1  |                            | collected for participants who discontinue or deviate                       |          |
| 2  |                            |                                                                             |          |
| 3  |                            | from intervention protocols                                                 |          |
| 4  |                            |                                                                             |          |
| 5  |                            |                                                                             |          |
| 6  | Data management            | <a href="#">#19</a> Plans for data entry, coding, security, and storage,    | 16       |
| 7  |                            |                                                                             |          |
| 8  |                            | including any related processes to promote data quality                     |          |
| 9  |                            |                                                                             |          |
| 10 |                            | (eg, double data entry; range checks for data values).                      |          |
| 11 |                            |                                                                             |          |
| 12 |                            | Reference to where details of data management                               |          |
| 13 |                            |                                                                             |          |
| 14 |                            | procedures can be found, if not in the protocol                             |          |
| 15 |                            |                                                                             |          |
| 16 |                            |                                                                             |          |
| 17 |                            |                                                                             |          |
| 18 | Statistics: outcomes       | <a href="#">#20a</a> Statistical methods for analysing primary and          | 13-14    |
| 19 |                            |                                                                             |          |
| 20 |                            | secondary outcomes. Reference to where other details                        |          |
| 21 |                            |                                                                             |          |
| 22 |                            | of the statistical analysis plan can be found, if not in the                |          |
| 23 |                            |                                                                             |          |
| 24 |                            | protocol                                                                    |          |
| 25 |                            |                                                                             |          |
| 26 |                            |                                                                             |          |
| 27 |                            |                                                                             |          |
| 28 | Statistics: additional     | <a href="#">#20b</a> Methods for any additional analyses (eg, subgroup and  | 13-14    |
| 29 |                            |                                                                             |          |
| 30 | analyses                   | adjusted analyses)                                                          |          |
| 31 |                            |                                                                             |          |
| 32 |                            |                                                                             |          |
| 33 | Statistics: analysis       | <a href="#">#20c</a> Definition of analysis population relating to protocol | 13-14    |
| 34 |                            |                                                                             |          |
| 35 | population and             | non-adherence (eg, as randomised analysis), and any                         |          |
| 36 |                            |                                                                             |          |
| 37 | missing data               | statistical methods to handle missing data (eg, multiple                    |          |
| 38 |                            |                                                                             |          |
| 39 |                            | imputation)                                                                 |          |
| 40 |                            |                                                                             |          |
| 41 |                            |                                                                             |          |
| 42 |                            |                                                                             |          |
| 43 | <b>Methods: Monitoring</b> |                                                                             |          |
| 44 |                            |                                                                             |          |
| 45 |                            |                                                                             |          |
| 46 | Data monitoring:           | <a href="#">#21a</a> Composition of data monitoring committee (DMC);        | Supp for |
| 47 |                            |                                                                             |          |
| 48 | formal committee           | summary of its role and reporting structure; statement                      | editors  |
| 49 |                            |                                                                             |          |
| 50 |                            |                                                                             |          |
| 51 |                            | of whether it is independent from the sponsor and                           |          |
| 52 |                            |                                                                             |          |
| 53 |                            | competing interests; and reference to where further                         |          |
| 54 |                            |                                                                             |          |
| 55 |                            | details about its charter can be found, if not in the                       |          |
| 56 |                            |                                                                             |          |
| 57 |                            | protocol. Alternatively, an explanation of why a DMC is                     |          |
| 58 |                            |                                                                             |          |
| 59 |                            |                                                                             |          |
| 60 |                            |                                                                             |          |

|    |                      |                                                                             |       |
|----|----------------------|-----------------------------------------------------------------------------|-------|
| 1  |                      | not needed                                                                  |       |
| 2  |                      |                                                                             |       |
| 3  |                      |                                                                             |       |
| 4  | Data monitoring:     | <a href="#">#21b</a> Description of any interim analyses and stopping       | 14    |
| 5  |                      |                                                                             |       |
| 6  | interim analysis     | guidelines, including who will have access to these                         |       |
| 7  |                      |                                                                             |       |
| 8  |                      | interim results and make the final decision to terminate                    |       |
| 9  |                      |                                                                             |       |
| 10 |                      | the trial                                                                   |       |
| 11 |                      |                                                                             |       |
| 12 |                      |                                                                             |       |
| 13 | Harms                | <a href="#">#22</a> Plans for collecting, assessing, reporting, and         | 14-15 |
| 14 |                      |                                                                             |       |
| 15 |                      | managing solicited and spontaneously reported                               |       |
| 16 |                      |                                                                             |       |
| 17 |                      | adverse events and other unintended effects of trial                        |       |
| 18 |                      |                                                                             |       |
| 19 |                      | interventions or trial conduct                                              |       |
| 20 |                      |                                                                             |       |
| 21 |                      |                                                                             |       |
| 22 |                      |                                                                             |       |
| 23 | Auditing             | <a href="#">#23</a> Frequency and procedures for auditing trial conduct, if | 15    |
| 24 |                      |                                                                             |       |
| 25 |                      | any, and whether the process will be independent from                       |       |
| 26 |                      |                                                                             |       |
| 27 |                      | investigators and the sponsor                                               |       |
| 28 |                      |                                                                             |       |
| 29 |                      |                                                                             |       |
| 30 |                      |                                                                             |       |
| 31 | <b>Ethics and</b>    |                                                                             |       |
| 32 |                      |                                                                             |       |
| 33 | <b>dissemination</b> |                                                                             |       |
| 34 |                      |                                                                             |       |
| 35 |                      |                                                                             |       |
| 36 | Research ethics      | <a href="#">#24</a> Plans for seeking research ethics committee /           | 15    |
| 37 |                      |                                                                             |       |
| 38 | approval             | institutional review board (REC / IRB) approval                             |       |
| 39 |                      |                                                                             |       |
| 40 |                      |                                                                             |       |
| 41 | Protocol             | <a href="#">#25</a> Plans for communicating important protocol              | 15    |
| 42 |                      |                                                                             |       |
| 43 | amendments           | modifications (eg, changes to eligibility criteria,                         |       |
| 44 |                      |                                                                             |       |
| 45 |                      | outcomes, analyses) to relevant parties (eg,                                |       |
| 46 |                      |                                                                             |       |
| 47 |                      | investigators, REC / IRBs, trial participants, trial                        |       |
| 48 |                      |                                                                             |       |
| 49 |                      | registries, journals, regulators)                                           |       |
| 50 |                      |                                                                             |       |
| 51 |                      |                                                                             |       |
| 52 |                      |                                                                             |       |
| 53 |                      |                                                                             |       |
| 54 | Consent or assent    | <a href="#">#26a</a> Who will obtain informed consent or assent from        | 15-16 |
| 55 |                      |                                                                             |       |
| 56 |                      | potential trial participants or authorised surrogates, and                  |       |
| 57 |                      |                                                                             |       |
| 58 |                      |                                                                             |       |
| 59 |                      |                                                                             |       |
| 60 |                      |                                                                             |       |



|    |                       |                                                                                |    |
|----|-----------------------|--------------------------------------------------------------------------------|----|
| 1  |                       | how (see Item 32)                                                              |    |
| 2  |                       |                                                                                |    |
| 3  |                       |                                                                                |    |
| 4  | Consent or assent:    | <a href="#">#26b</a> Additional consent provisions for collection and use of   | 16 |
| 5  |                       |                                                                                |    |
| 6  | ancillary studies     | participant data and biological specimens in ancillary                         |    |
| 7  |                       |                                                                                |    |
| 8  |                       | studies, if applicable                                                         |    |
| 9  |                       |                                                                                |    |
| 10 |                       |                                                                                |    |
| 11 | Confidentiality       | <a href="#">#27</a> How personal information about potential and enrolled      | 16 |
| 12 |                       |                                                                                |    |
| 13 |                       | participants will be collected, shared, and maintained in                      |    |
| 14 |                       |                                                                                |    |
| 15 |                       | order to protect confidentiality before, during, and after                     |    |
| 16 |                       |                                                                                |    |
| 17 |                       | the trial                                                                      |    |
| 18 |                       |                                                                                |    |
| 19 |                       |                                                                                |    |
| 20 |                       |                                                                                |    |
| 21 | Declaration of        | <a href="#">#28</a> Financial and other competing interests for principal      | 17 |
| 22 |                       |                                                                                |    |
| 23 | interests             | investigators for the overall trial and each study site                        |    |
| 24 |                       |                                                                                |    |
| 25 |                       |                                                                                |    |
| 26 | Data access           | <a href="#">#29</a> Statement of who will have access to the final trial       | 16 |
| 27 |                       |                                                                                |    |
| 28 |                       | dataset, and disclosure of contractual agreements that                         |    |
| 29 |                       |                                                                                |    |
| 30 |                       | limit such access for investigators                                            |    |
| 31 |                       |                                                                                |    |
| 32 |                       |                                                                                |    |
| 33 |                       |                                                                                |    |
| 34 | Ancillary and post    | <a href="#">#30</a> Provisions, if any, for ancillary and post-trial care, and | 16 |
| 35 |                       |                                                                                |    |
| 36 | trial care            | for compensation to those who suffer harm from trial                           |    |
| 37 |                       |                                                                                |    |
| 38 |                       | participation                                                                  |    |
| 39 |                       |                                                                                |    |
| 40 |                       |                                                                                |    |
| 41 |                       |                                                                                |    |
| 42 | Dissemination policy: | <a href="#">#31a</a> Plans for investigators and sponsor to communicate        | 16 |
| 43 |                       |                                                                                |    |
| 44 | trial results         | trial results to participants, healthcare professionals,                       |    |
| 45 |                       |                                                                                |    |
| 46 |                       | the public, and other relevant groups (eg, via                                 |    |
| 47 |                       |                                                                                |    |
| 48 |                       | publication, reporting in results databases, or other                          |    |
| 49 |                       |                                                                                |    |
| 50 |                       | data sharing arrangements), including any publication                          |    |
| 51 |                       |                                                                                |    |
| 52 |                       | restrictions                                                                   |    |
| 53 |                       |                                                                                |    |
| 54 |                       |                                                                                |    |
| 55 |                       |                                                                                |    |
| 56 | Dissemination policy: | <a href="#">#31b</a> Authorship eligibility guidelines and any intended use of | 16 |
| 57 |                       |                                                                                |    |
| 58 |                       |                                                                                |    |
| 59 |                       |                                                                                |    |
| 60 |                       |                                                                                |    |

1 authorship professional writers  
 2  
 3  
 4 Dissemination policy: [#31c](#) Plans, if any, for granting public access to the full 16  
 5  
 6 reproducible protocol, participant-level dataset, and statistical code  
 7  
 8 research  
 9

## 11 Appendices

14 Informed consent [#32](#) Model consent form and other related documentation Supp 1  
 15  
 16 materials given to participants and authorised surrogates  
 17  
 18  
 19 Biological specimens [#33](#) Plans for collection, laboratory evaluation, and storage Supp 2  
 20  
 21 of biological specimens for genetic or molecular  
 22  
 23 analysis in the current trial and for future use in  
 24  
 25 ancillary studies, if applicable  
 26  
 27

29 None The SPIRIT Explanation and Elaboration paper is distributed under the terms of the Creative  
 30  
 31 Commons Attribution License CC-BY-NC. This checklist can be completed online using  
 32  
 33 <https://www.goodreports.org/>, a tool made by the [EQUATOR Network](#) in collaboration with  
 34  
 35 [Penelope.ai](#)  
 36  
 37  
 38  
 39  
 40  
 41  
 42  
 43  
 44  
 45  
 46  
 47  
 48  
 49  
 50  
 51  
 52  
 53  
 54  
 55  
 56  
 57  
 58  
 59  
 60

# BMJ Open

## Serotype 3 Experimental Human Pneumococcal Challenge (EHPC) study protocol; Dose ranging and reproducibility in a healthy volunteer population (Challenge 3)

|                               |                                                                                                                                                                                                                                                                                                                                                                                                                                                                                                                                                                                                                                                                                                                                                                                                                                                                                                                                                                                                                                                                                                                                                                                                                                                                                                                                                                                                                                                                                                                                                                                                                                                                                                                                                                                                                                                                                                                                                                                                                                                                                      |
|-------------------------------|--------------------------------------------------------------------------------------------------------------------------------------------------------------------------------------------------------------------------------------------------------------------------------------------------------------------------------------------------------------------------------------------------------------------------------------------------------------------------------------------------------------------------------------------------------------------------------------------------------------------------------------------------------------------------------------------------------------------------------------------------------------------------------------------------------------------------------------------------------------------------------------------------------------------------------------------------------------------------------------------------------------------------------------------------------------------------------------------------------------------------------------------------------------------------------------------------------------------------------------------------------------------------------------------------------------------------------------------------------------------------------------------------------------------------------------------------------------------------------------------------------------------------------------------------------------------------------------------------------------------------------------------------------------------------------------------------------------------------------------------------------------------------------------------------------------------------------------------------------------------------------------------------------------------------------------------------------------------------------------------------------------------------------------------------------------------------------------|
| Journal:                      | <i>BMJ Open</i>                                                                                                                                                                                                                                                                                                                                                                                                                                                                                                                                                                                                                                                                                                                                                                                                                                                                                                                                                                                                                                                                                                                                                                                                                                                                                                                                                                                                                                                                                                                                                                                                                                                                                                                                                                                                                                                                                                                                                                                                                                                                      |
| Manuscript ID                 | bmjopen-2023-075948.R1                                                                                                                                                                                                                                                                                                                                                                                                                                                                                                                                                                                                                                                                                                                                                                                                                                                                                                                                                                                                                                                                                                                                                                                                                                                                                                                                                                                                                                                                                                                                                                                                                                                                                                                                                                                                                                                                                                                                                                                                                                                               |
| Article Type:                 | Protocol                                                                                                                                                                                                                                                                                                                                                                                                                                                                                                                                                                                                                                                                                                                                                                                                                                                                                                                                                                                                                                                                                                                                                                                                                                                                                                                                                                                                                                                                                                                                                                                                                                                                                                                                                                                                                                                                                                                                                                                                                                                                             |
| Date Submitted by the Author: | 13-Oct-2023                                                                                                                                                                                                                                                                                                                                                                                                                                                                                                                                                                                                                                                                                                                                                                                                                                                                                                                                                                                                                                                                                                                                                                                                                                                                                                                                                                                                                                                                                                                                                                                                                                                                                                                                                                                                                                                                                                                                                                                                                                                                          |
| Complete List of Authors:     | <p>Hazenberg, Phoebe; Liverpool School of Tropical Medicine, Liverpool Vaccine Group</p> <p>Robinson, Ryan; Liverpool School of Tropical Medicine, Liverpool Vaccine Group; Liverpool University Hospitals NHS Foundation Trust, Respiratory department</p> <p>Farrar, Madlen; Liverpool School of Tropical Medicine, Liverpool Vaccine Group</p> <p>Solorzano, Carla; Liverpool School of Tropical Medicine, Liverpool Vaccine Group ; University of Oxford, Oxford Vaccine Group</p> <p>Hyder-Wright, Angela; Liverpool School of Tropical Medicine, Liverpool Vaccine Group ; Liverpool University Hospitals NHS Foundation Trust, Respiratory Department</p> <p>Liatsikos, Konstantinos; Liverpool School of Tropical Medicine, Liverpool Vaccine Group</p> <p>Brunning, Jaye; Liverpool School of Tropical Medicine, Liverpool Vaccine Group</p> <p>Fleet, Hannah; Liverpool School of Tropical Medicine, Liverpool Vaccine Group</p> <p>Bettam, Amy; Liverpool School of Tropical Medicine, Liverpool Vaccine Group</p> <p>Howard, Ashleigh; Liverpool School of Tropical Medicine, Liverpool Vaccine Group</p> <p>Kenny-Nyazika, Tinashe; Liverpool School of Tropical Medicine, Liverpool Vaccine Group</p> <p>Urban, Britta; Liverpool School of Tropical Medicine, Liverpool Vaccine Group ; University of Oxford, Oxford Vaccine Group</p> <p>Mitsi, Elena; Liverpool School of Tropical Medicine, Liverpool Vaccine Group ; University of Oxford, Oxford Vaccine Group</p> <p>El Safadi, Dima; Liverpool School of Tropical Medicine, Liverpool Vaccine Group</p> <p>Davies, Kelly; Liverpool School of Tropical Medicine, Liverpool Vaccine Group</p> <p>Lesosky, Maia; Liverpool School of Tropical Medicine Department of Clinical Sciences, Global Health Trials Unit</p> <p>Gordon, Stephen; Liverpool School of Tropical Medicine, Liverpool Vaccine Group ; Malawi-Liverpool-Wellcome Trust Clinical Research Programme</p> <p>Ferreira, Daniela; Liverpool School of Tropical Medicine, Liverpool Vaccine Group ; University of Oxford, Oxford Vaccine Group</p> |

1  
2  
3  
4  
5  
6  
7  
8  
9  
10  
11  
12  
13  
14  
15  
16  
17  
18  
19  
20  
21  
22  
23  
24  
25  
26  
27  
28  
29  
30  
31  
32  
33  
34  
35  
36  
37  
38  
39  
40  
41  
42  
43  
44  
45  
46  
47  
48  
49  
50  
51  
52  
53  
54  
55  
56  
57  
58  
59  
60

|                                    |                                                                                                                                                              |
|------------------------------------|--------------------------------------------------------------------------------------------------------------------------------------------------------------|
|                                    | Collins, Andrea; Liverpool School of Tropical Medicine, Liverpool Vaccine Group; Liverpool University Hospitals NHS Foundation Trust, Respiratory Department |
| <b>Primary Subject Heading</b> :   | Respiratory medicine                                                                                                                                         |
| <b>Secondary Subject Heading</b> : | Infectious diseases                                                                                                                                          |
| <b>Keywords</b> :                  | Respiratory infections < THORACIC MEDICINE, BACTERIOLOGY, Clinical Trial, Immunology < THORACIC MEDICINE, Adult thoracic medicine < THORACIC MEDICINE        |
|                                    |                                                                                                                                                              |

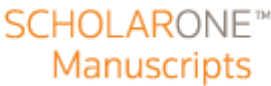

1  
2  
3 1 **Serotype 3 Experimental Human Pneumococcal Challenge (EHPC) study protocol; Dose**  
4 2 **ranging and reproducibility in a healthy volunteer population (Challenge 3)**  
5  
6  
7 3

8  
9 4 Phoebe Hazenberg<sup>1</sup>, Ryan Robinson<sup>1,3</sup>, Madlen Farrar<sup>1</sup>, Carla Solórzano<sup>1,2</sup>, Angela Hyder-Wright<sup>1,3</sup>,  
10 5 Konstantinos Liatsikos<sup>1</sup>, Jaye Brunning<sup>1</sup>, Hannah Fleet<sup>1</sup>, Amy Bettam<sup>1</sup>, Ashleigh Howard<sup>1</sup>, Tinashe K.  
11 6 Nyazika<sup>1</sup>, Britta C Urban<sup>1,2</sup>, Elena Mitsi<sup>1,2</sup>, Dima El Safadi<sup>1</sup>, Kelly Davies<sup>1</sup>, Maia Lesosky<sup>4</sup>, Stephen B.  
12 7 Gordon<sup>1,5</sup>, Daniela M. Ferreira<sup>1,2\*</sup>, Andrea M. Collins<sup>1,3\*</sup>

13  
14  
15 8 <sup>1</sup>Liverpool Vaccine Group, Liverpool School of Tropical Medicine, UK

16  
17 9 <sup>2</sup> Oxford Vaccine Group, University of Oxford, UK

18  
19 10 <sup>3</sup> Respiratory Research Group, Liverpool University Hospital Foundation Trust, UK

20  
21 11 <sup>4</sup>Clinical Trials Unit, Liverpool School of Tropical Medicine, UK

22  
23 12 <sup>5</sup>Malawi-Liverpool-Wellcome Trust Clinical Research Programme, Malawi

24  
25 13 \*joint senior authors  
26  
27  
28  
29

30 15 **Corresponding authors:**

31  
32 16 Andrea Collins (contact for public queries)

33  
34 17 Email address: [andrea.collins@lstmed.ac.uk](mailto:andrea.collins@lstmed.ac.uk)

35  
36 18 Address: Liverpool Life Sciences Accelerator Building, 1 Daulby Street, Liverpool, L7 8XZ

37  
38 19 Daniela Ferreira

39  
40 20 Email: [daniela.ferreira@paediatrics.ox.ac.uk](mailto:daniela.ferreira@paediatrics.ox.ac.uk)

41  
42 21 Address: Old Road Campus, University of Oxford Campus, Old Rd, Roosevelt Dr, Headington, Oxford  
43 22 OX3 7TY

44  
45 23  
46 24 **Sponsor:** Liverpool School of Tropical Medicine, Research and Development, Pembroke Place,  
47 25 Liverpool, L3 5QA; Phone: 0151 705 3794; Email: [denise.watson@lstmed.ac.uk](mailto:denise.watson@lstmed.ac.uk)

48  
49  
50 26  
51 27 **Keywords:** Adolescent, Adult, Healthy Volunteers, Humans, Middle Aged, Nasopharynx,  
52 28 Pneumococcal Pneumonia, Pneumococcal Vaccines,

53  
54 29 **Countries of recruitment:** United Kingdom

55  
56 30 **Recruitment status:** currently recruiting and enrolling participants  
57  
58  
59  
60

32

**ABSTRACT****Introduction**

Since the introduction of pneumococcal conjugate vaccines (PCVs), pneumococcal disease rates have declined for many vaccine-type (VT) serotypes. However, serotype 3 (SPN3) continues to cause significant disease and is identified in colonisation epidemiological studies as one of the top circulating serotypes in adults in the UK. Consequently, new vaccines that provide greater protection against SPN3 colonisation/carriage are urgently needed. The Experimental Human Pneumococcal Challenge (EHPC) model is a unique method of determining pneumococcal colonisation rates, understanding acquired immunity, and testing vaccines in a cost-effective manner. To enhance the development of effective pneumococcal vaccines against SPN3, we aim to develop a new relevant and safe SPN3 EHPC model with high attack rates which could be used to test vaccines using small sample size.

**Methods and Analysis**

This is a human challenge study to establish a new SPN3 EHPC model, consisting of two parts. In the dose-ranging/safety study, cohorts of 10 healthy participants will be challenged with escalating doses of SPN3. If first challenge does not lead into colonisation, participants will receive a second challenge 2-weeks after. Experimental nasopharyngeal (NP) colonisation will be determined using nasal wash sampling. Using the dose that results in  $\geq 50\%$  of participants being colonised, with a high safety profile, we will complete the cohort with another 33 participants to check for reproducibility of the colonisation rate. The primary outcome of this study is to determine the optimal SPN3 dose and inoculation regime to establish the highest rates of NP colonisation in healthy adults. Secondary outcomes include determining density and duration of experimental SPN3 NP colonisation and characterising mucosal and systemic immune responses to SPN3 challenge.

**Ethics and Dissemination**

This study is approved by the NHS Research and Ethics Committee (Reference 22/NW/0051). Findings will be published in peer-reviewed journals and reports will be made available to participants.

ISRCTN registry number: 17879306. Registered 4<sup>th</sup> April 2022. Protocol version 3.0 (7<sup>th</sup> April 2022).

**ARTICLE SUMMARY****Strengths and Limitations of the Study**

- The use of a novel inoculation regime of a second (targeted booster) inoculation to participants not colonised after first challenge could increase colonisation rates, (unpublished data from ISRCTN12884329); higher colonisation rates will allow smaller sample sizes in future vaccine work, reducing study costs and time, resulting in improved, more globally accessible pneumococcal vaccines faster.

- 1  
2  
3 67 • Additionally, the use of clinical globally relevant strains from the UK and Malawi not used before  
4 68 in EHPC studies (Serotype 3 10V CC700 and Serotype 3 LIV014-S3 CC180) will allow the  
5 69 independent conduct of future pneumococcal vaccine studies in various settings and potentially  
6 70 a future global co-challenge collaborations network.  
7  
8  
9 71 • The evaluation of bacterial shedding of SPN3 through hand swabs, cough plates and exhaled  
10 72 detection facemasks is novel and could provide greater understanding of how SPN3 is spread  
11 73 amongst individuals, eventually leading to improved infection and prevention control in  
12 74 hospitalised patients.  
13  
14  
15 75 • Follow-up beyond 14 days will allow evaluation of longer-term local immune response to SPN3  
16 76 and as well as providing longer term data on colonisation rate, density and duration.  
17  
18 77 • The main limitation of this study is the similarity to the EHPC Pneumo 1 study, which used  
19 78 different SPN3 isolates that are proprietary to a 3<sup>rd</sup> party to establish an SPN3 model.  
20  
21 79

## 80 INTRODUCTION

81 *Streptococcus pneumoniae* (SPN) is a major cause of morbidity and mortality from a lower respiratory  
82 tract infection globally(1). Available pneumococcal conjugated vaccines (PCVs) confer protection by  
83 reducing vaccine-type (VT) SPN colonisation density and are effective against invasive pneumococcal  
84 disease (IPD) (2). After the introduction of PCV-13 into national paediatric immunisation programs,  
85 overall combined-VT IPD amongst all ages significantly reduced (3). However, surveillance data  
86 showed limited declines in serotype 3 (SPN3) IPD in all ages, despite this serotype being included in  
87 PCV-13(4). This is thought to be due to specific characteristics of the SPN3 capsule(5), which could  
88 theoretically overwhelm the protective capacity of antibodies that are produced in response to the  
89 vaccine. There could be also other evasion mechanisms apart from antibody responses that could play  
90 a role in why SPN3 is different and continues to circulate amongst vaccinated communities.

91 An observational study of IPD rates in England 2014-2018 showed an increase in SPN3 IPD cases,  
92 with SPN3 contributing the most to total IPD deaths(6). Furthermore, a randomised controlled trial  
93 (RCT) did not show significant difference in SPN3 colonisation post PCV-13 in infants when compared  
94 to PCV-7 (which does not include SPN3) as a control (7). Taken altogether, current data suggests that  
95 even if PCV-13 protects against SPN3 directly to some degree, it does not sufficiently produce the  
96 sustained indirect protective effects seen against other VTs. Therefore, novel vaccines providing higher  
97 levels of protection against SPN3 colonisation (and therefore disease) are needed.

98 The Experimental Human Pneumococcal Challenge (EHPC) model allows vaccines to be tested for  
99 their effect on experimental SPN colonisation/carriage, in a more cost-effective manner than field  
100 studies, with fewer participants and shorter follow-up (8-10). Participants are intranasally inoculated  
101 with SPN, inducing a stable colonisation episode for about 1-3 weeks, at a density typical of natural  
102 colonisation. Host samples including nasal washes, nasal cells and blood are taken to assess  
103 colonisation as well as the immune responses. The model has provided key insights into human  
104 immune mechanisms that are associated with protection and susceptibility to colonisation acquisition  
105 (11-13). The model is well developed for serotypes SPN6B and SPN15B with over 2000 challenges in  
106 over 15 independent studies, showing the model is safe and has reproducible attack rates. In recent  
107 studies the model has been used to explore bacterial shedding and the transmission potential of  
108 SPN6B, demonstrating that hands can be a vehicle for transmission of SPN6B and lead to 18%  
109 colonisation when suspensions containing the bacteria are either sniffed from the hand or inserted into  
110 the nose via a finger (14). SPN transmission has been associated with living with a larger number of  
111 people, typically in prisons or nursing homes(15), therefore evaluating methods of shedding provides  
112 invaluable insight into how this transmission occurs and can be prevented.

113 More recently, 96 healthy participants were challenged with three different proprietary strains of SPN3  
114 at various doses. Colonisation rates varied from 30-70% and the model was shown to be safe and  
115 feasible (16). Interestingly, there was no increase in levels of nasal SPN3 anti-capsular antibodies in  
116 colonised participants at day-14 post-inoculation, suggesting that there could be a lack of  
117 immunogenicity with SPN3, unlike has been demonstrated in previous studies(7). Additionally, 30.2%  
118 of participants reported symptoms when questioned at routine clinic visits, of whom the majority



119 described a sore throat. SPN has not previously been commonly associated with pharyngitis(17) and  
120 further investigation into this is required.

121 To ensure the EHPC model remains at the cutting edge of pneumococcal (current and future) vaccine  
122 assessment, we are proposing here to set up an EHPC model with carefully selected non-proprietary  
123 SPN3 strains and a second (targeted booster) inoculation to achieve maximum attack rates. In this  
124 study, in addition to determining the optimal dose and isolate of SPN3 to establish highest rates of  
125 colonisation in the human nasopharynx, we intend to improve the knowledge of both mucosal and  
126 serological immune responses to SPN3 colonisation. We will investigate longer-term immune response  
127 to SPN3 colonisation (beyond 14 days) and for the first time we will use a targeted booster SPN3  
128 inoculation to improve colonisation rates and evaluate the impact that this has on immunogenicity. We  
129 hypothesise that this could better simulate natural SPN colonisation in high transmission settings,  
130 whereby individuals are likely to be repeatedly exposed.

131 Additional exploratory outcomes will be assessed, including evaluating SPN3 shedding and further  
132 investigating symptoms experienced post-inoculation. The results from this study will be used to inform  
133 development of improved SPN3 vaccines and to inform design of future pneumococcal vaccine RCTs.  
134 We plan to transfer this SPN3 model to Malawi, where SPN3 is a dominant disease-causing and  
135 antimicrobial resistance-transmitting serotype. Our previous transfer of the SPN6B model has been  
136 safe and successful, revealing important differences in vaccine response in highly endemic low  
137 resource settings (18).

138 The primary aim of this study is to determine the optimal SPN3 dose and isolate to establish  
139 experimental nasopharyngeal colonisation in healthy adults. Success in this project will result in:

- 140 1. Expansion of the EHPC model to demonstrate safe SPN3 colonisation with new non-proprietary  
141 isolates. This will allow better understanding of SPN3 colonisation dynamics and identification  
142 of correlates of protection.
- 143 2. Determination of the optimum isolate/dose and safety of SPN3 booster inoculation, to allow  
144 future testing of vaccines in double blind randomised controlled trials with even smaller  
145 numbers of participants than usual EHPC studies (and significantly less than are required for  
146 field studies).

## 148 **METHODS AND ANALYSIS**

### 149 **Study Overview**

150 This protocol has been reported following the SPIRIT reporting guidelines (19).

151 This is a human challenge study of healthy adult participants who will be nasally inoculated with well-  
152 characterised, fully sequenced-penicillin sensitive SPN3, for the assessment of acquisition of nasal  
153 pneumococcal colonisation and immune responses. We will conduct a dose-ranging study to determine  
154 the optimum SPN3 isolate and dose for safe colonisation acquisition and confirm the dose and safety  
155 in a subsequent larger cohort in a reproducibility study. This study will run from July 2022 to October

156 2023 at the Accelerator Research Building, Liverpool School of Tropical Medicine (LSTM), Liverpool,  
157 UK.

158 Figure 1 displays the study process. In the dose ranging study, sequential cohorts of 10 healthy  
159 participants will be challenged with escalating doses of SPN3. We will start at 10,000 colony forming  
160 unit (CFU)/naris and after n=10, escalate to 20,000 CFU/naris (n=10) and then 80,000 CFU/naris (n=10)  
161 if safe to do so. The first challenge cohort at 10,000 CFU/naris will start slowly with a smaller group  
162 (n=1-6) inoculated per week, for safety, before completing the group (n=10). We may increase the dose  
163 further depending on colonisation rates after consultation with the Trial Monitoring Group (TMG). If  
164 optimum attack/ colonisation acquisition rates are achieved ( $\geq 50\%$ ) in the lower doses, the higher dose  
165 escalation groups may not be completed - this will be discussed with the trial steering committee (TSC)  
166 before a decision to omit the higher doses is made. We may escalate the dose before a cohort of n=10  
167 is inoculated, and subsequent escalated doses may be omitted if the colonisation rates are low. This is  
168 in the interest of not inoculating participants at a dose that could be futile. This will be at the discretion  
169 of the CI.

170 Up to 2 isolates will be tested in this manner, Serotype 3 10V CC700 and Serotype 3 LIV014-S3 CC180.  
171 In case of not achieving the desired attack rate with any of the isolates, the data obtained will be  
172 reviewed to either test an additional isolate or complete the cohort at a lower attack rate.

173 Using the dose, isolate and inoculation regime that results in  $\geq 50\%$  colonisation acquisition/attack rate,  
174 with a high safety profile, we will complete the cohort with another 33 participants to check for  
175 reproducibility of attack rate. In previous research conducted with SPN6B, colonisation rates of 58.5%  
176 were seen with single inoculation and of those who were negative after the first inoculation, a further  
177 41.7% then became positive after a second inoculation, resulting in a combined colonisation rate  
178 following two inoculations of 70.7%.

### 179 **Study Objectives and Outcomes**

180 Study objectives and outcomes measures are demonstrated in Table 1.

181 **Table 1. Objectives and Outcome Measures**

|                | <b>Objectives</b>                                                                                                                   | <b>Outcome Measures</b>                                                                                                                                                                                                                                                                                                                      |
|----------------|-------------------------------------------------------------------------------------------------------------------------------------|----------------------------------------------------------------------------------------------------------------------------------------------------------------------------------------------------------------------------------------------------------------------------------------------------------------------------------------------|
| <b>Primary</b> | To determine the optimal SPN3 dose and isolate to establish colonisation of the nasopharynx in healthy adults using the EHPC model. | The proportion of participants with experimental SPN3 colonisation of the nasopharynx, determined by SPN3 presence in classical microbiological culture in at least one nasal wash (NW) sample, at any time point following one or two inoculations (combined and individually). This will be assessed for each isolate and dose separately. |

|                    |                                                                                                                                              |                                                                                                                                                                                                                                                                                                 |
|--------------------|----------------------------------------------------------------------------------------------------------------------------------------------|-------------------------------------------------------------------------------------------------------------------------------------------------------------------------------------------------------------------------------------------------------------------------------------------------|
| <b>Secondary</b>   | To ascertain the rate of experimental colonisation acquisition of SPN3 in healthy adults post challenge, by classical and molecular methods. | The rate of occurrence of SPN3 experimental colonisation of the nasopharynx, determined by SPN3 presence in classical microbiological culture and qPCR (combined and individually) from at least one NW sample at any time point following one or two inoculations (combined and individually). |
|                    | To determine the density of experimental SPN3 colonisation of the nasopharynx.                                                               | The bacterial density of experimental SPN3 colonisation of the nasopharynx in NW, at each and any time point following one or two inoculations (combined and individually), determined by classical microbiological culture and molecular methods.                                              |
|                    | To determine the duration of experimental SPN3 colonisation of the nasopharynx.                                                              | The duration of experimental SPN3 colonisation of nasopharynx determined by the last NW sample following one or two inoculations (combined and individually) in which SPN3 is detected by classical microbiological culture or molecular methods.                                               |
| <b>Exploratory</b> | To determine grading score of symptoms during experimental colonisation (e.g., sore throat, rhinitis, nasal congestion).                     | The presence of mild or moderate symptoms as recorded on a Likert scale in participants with SPN3 within the first 7 days after inoculations. Sore throat grading score will also be used if applicable.                                                                                        |
|                    | To characterise mucosal immune cell populations and dynamics in response to SPN3 experimental inoculation in nasal cell samples.             | Cell immunophenotyping using flow cytometry methods to identify and characterise cell populations such as neutrophils, monocytes, T cells and B cells in nasal cells samples at screening and 2, 7, 13, 16, 21 and 28 days after first inoculation.                                             |
|                    | To determine the level of mucosal and systemic SPN3 polysaccharide-specific antibodies at baseline and after SPN3 experimental inoculation.  | Measurement of anti-SPN3 polysaccharide specific immunoglobulin G (IgG) levels in serum and nasal wash samples using ELISAs.                                                                                                                                                                    |
|                    | To determine the levels of polysaccharide specific SPN3 memory B cells at baseline and after SPN3 experimental inoculation.                  | Quantification and characterisation of the number of SPN3- polysaccharide specific memory B cell populations in PBMC samples using flow cytometry methods at screening and 13 and 28 days after first inoculation.                                                                              |
|                    | To describe nasal inflammatory kinetics induced by SPN3 experimental inoculation.                                                            | Measurement of 30 cytokines and chemokines using multiplex Luminex in nasosorption samples at screening and 2, 7, 13, 16, 21 and 28 days after first inoculation.                                                                                                                               |

|  |                                                                                                                                                  |                                                                                                                                                                                                                                                                                  |
|--|--------------------------------------------------------------------------------------------------------------------------------------------------|----------------------------------------------------------------------------------------------------------------------------------------------------------------------------------------------------------------------------------------------------------------------------------|
|  | To assess bacterial shedding after pneumococcal colonisation.                                                                                    | The rate of pneumococcal bacterial shedding as defined by swabs of hand and cough-plate based assessment post inoculation (presence and density CFU/ml) at 2, 7, 13, 16, 21 and 28 days after first inoculation. (During COVID-19 pandemic cough sampling may not be performed). |
|  | To compare 'exhaled detection facemask' (EDF) with cough plate-based methods of assessing SPN3 bacterial shedding post-pneumococcal inoculation. | The rate of pneumococcal bacterial shedding as defined by exhaled detection facemask and cough-plate based assessment post- inoculation at 2- and 7-days post-inoculation (presence and density [CFU/ml])                                                                        |
|  | To determine the effect of natural SPN (non-SPN3) colonisation on SPN3 colonisation.                                                             | The rate of occurrence and density of SPN3 colonisation of the nasopharynx post-inoculation in natural SPN carriers, determined by SPN3 presence and density in classical microbiology culture or qPCR from at least one NW sample at any timepoint post-inoculation.            |
|  | To compare rates, density and duration of SPN3 colonisation in saliva vs nasopharyngeal samples.                                                 | The presence, density and duration of SPN3 colonisation in NW and saliva samples at any timepoint post-inoculation, identified using classical microbiology culture or qPCR                                                                                                      |

182

## 183 Study Participants

### 184 Inclusion/Exclusion Criteria

185 Healthy participants aged 18-50 (inclusive) who are fluent in English, have access to a mobile telephone  
 186 and have capacity to give informed consent will be allowed to participate. This age range minimises the  
 187 risk of IPD and allows comparison with our previously published EHPC work.

188 Tables 2 outlines the exclusion criteria for this study.

### 189 Table 2. Exclusion Criteria

|                      |                                                                                                                                                                          |
|----------------------|--------------------------------------------------------------------------------------------------------------------------------------------------------------------------|
| Research participant | Currently involved in another study unless observational or non-interventional, excluding the EHPC bronchoscopy study and COVID-19 observation and interventional trials |
|                      | Participant in any previous EHPC trial in past 1 year                                                                                                                    |
|                      | Previous EHPC trial inoculated with SPN3 in last 3 years                                                                                                                 |
| Vaccination          | Previous pneumococcal vaccination PPV23 or PCV13 or PCV10.                                                                                                               |
| Allergy              | Allergy to penicillin                                                                                                                                                    |

|                                                                                                                                                                                                                                                                                |                                                                                                                                                                                             |
|--------------------------------------------------------------------------------------------------------------------------------------------------------------------------------------------------------------------------------------------------------------------------------|---------------------------------------------------------------------------------------------------------------------------------------------------------------------------------------------|
| Comorbidities                                                                                                                                                                                                                                                                  | Chronic respiratory, cardiac, kidney, liver or neurological disease                                                                                                                         |
|                                                                                                                                                                                                                                                                                | Connective tissue disease                                                                                                                                                                   |
|                                                                                                                                                                                                                                                                                | Diabetes                                                                                                                                                                                    |
|                                                                                                                                                                                                                                                                                | Immunosuppressive disease                                                                                                                                                                   |
|                                                                                                                                                                                                                                                                                | Recurrent otitis media                                                                                                                                                                      |
|                                                                                                                                                                                                                                                                                | Asplenia or spleen dysfunction                                                                                                                                                              |
|                                                                                                                                                                                                                                                                                | Cochlear Implants                                                                                                                                                                           |
|                                                                                                                                                                                                                                                                                | Major cerebrospinal fluid leak                                                                                                                                                              |
|                                                                                                                                                                                                                                                                                | Uncontrolled medical/surgical conditions (at discretion of study doctor)                                                                                                                    |
|                                                                                                                                                                                                                                                                                | Major pneumococcal illness requiring hospitalisation within the last 10 years                                                                                                               |
|                                                                                                                                                                                                                                                                                | Other conditions considered by clinical team as a concern for safety/integrity of the study                                                                                                 |
| Medications                                                                                                                                                                                                                                                                    | Immunosuppressive medication                                                                                                                                                                |
|                                                                                                                                                                                                                                                                                | Long-term antibiotic use or use of antibiotics in 28 days prior to inoculation                                                                                                              |
| Direct caring role or close contact with individuals at higher risk of infection (during the EHPC period) unless wearing personal protective equipment                                                                                                                         | Children aged under 5                                                                                                                                                                       |
|                                                                                                                                                                                                                                                                                | Chronic ill health or immunosuppressed adults                                                                                                                                               |
|                                                                                                                                                                                                                                                                                | People that are part of extremely vulnerable group as defined by Public Health England                                                                                                      |
| Smoking/drug/alcohol use                                                                                                                                                                                                                                                       | Current or ex-smoker (daily cigarettes/e-cigarettes/smoking of recreational drugs) in the last 6 months. Participants who smoke <5 cigarettes per week may be included                      |
|                                                                                                                                                                                                                                                                                | Previous significant smoking history (>20 pack years)                                                                                                                                       |
|                                                                                                                                                                                                                                                                                | History or current drug or alcohol abuse (frequently drinking alcohol): men and women should not regularly drink >3 units/day and >2 units/day respectively) at discretion of the clinician |
| Biologically female participants of child-bearing potential who are currently pregnant/lactating, intending on becoming pregnant or not on effective birth control                                                                                                             |                                                                                                                                                                                             |
| Overseas travel (involving air travel) planned in follow up period of study visits                                                                                                                                                                                             |                                                                                                                                                                                             |
| Participants who meet following criteria at time of screening:                                                                                                                                                                                                                 |                                                                                                                                                                                             |
| <ul style="list-style-type: none"> <li>• Unexplained/concerning findings on history/examination <ul style="list-style-type: none"> <li>• Haemoglobin &lt;90g/dL</li> </ul> </li> <li>• White cell count (WCC) &lt;1.5 x10<sup>9</sup>/l or &gt;12 x10<sup>9</sup>/l</li> </ul> |                                                                                                                                                                                             |

- Platelets  $<75 \times 10^9/l$
- Oxygen saturations  $<94\%$

190

191 Additionally, we will employ temporary exclusion criteria, including:

- 192 • COVID-19 symptoms or confirmed current COVID-19 infection.
- 193 • Current/acute illness within 14 days prior to inoculation if COVID-19 negative.
- 194 • Positive COVID-19 swab within 10 days of inoculation. Participants will require negative lateral  
195 flow test prior to inoculation.
- 196 • COVID-19 vaccination 21 days prior to inoculation.
- 197 • Natural SPN3 colonisation identified in baseline nasal wash.

198 Participants who have been temporarily excluded at screening may be re-screened at a later date to  
199 assess their eligibility at this time for inclusion into the study.

## 200 **Participant recruitment**

201 Participants will be recruited from the general public, including through public engagement events,  
202 social media, generic research communication mailing lists, large local employers and local universities.

## 203 **Participant Timeline**

204 For both parts of the study, participants will attend an identical visit schedule, however the samples  
205 taken at these visits will differ (Figure 2). Participants will attend a screening visit, inoculation visit (day  
206 0) and then follow-up visits at days 2, 7, 13 and 28. The screening visit should occur 5 days prior to  
207 inoculation but a window of  $-7/+4$  days will be used. Figure 2 outlines the samples that are required at  
208 each visit.

209 All will first attend a screening visit to confirm eligibility through medical history, clinical examination and  
210 acquisition of samples including a full blood count and nasal wash sampling. Baseline nasal washes  
211 will be evaluated for natural colonisation with SPN (and serotype if present) through classical  
212 microbiological culture and molecular methods.

213 All participants will then attend an inoculation visit (day 0), where fluid containing SPN3 will be instilled  
214 into their nose. At this visit, they will be given a safety pack containing a thermometer, safety information  
215 leaflet and a 5-day course of amoxicillin. They will be instructed to contact the research team daily for  
216 3-5 days with their temperature recording and any symptoms. Participants who report symptoms  
217 consistent with pneumococcal disease will be reviewed in person by a clinician and may be instructed  
218 to take their antibiotic course. Participants have 24-hour access to research clinicians as well as access  
219 to hospital facilities and prompt treatment if required.

220 In the dose-ranging study, a second targeted booster inoculation will be given to participants on day 14  
221 if they have tested negative for SPN3 on day 2 and 7 samples. In the reproducibility study, it will be at  
222 the discretion of the chief investigator (CI) to decide if targeted booster inoculation should be applied,  
223 based on results of the dose-ranging study. If a second inoculation is included in the reproducibility

224 study, it will be only given at day 14 to those participants who are negative for SPN3 at days 2 and 7  
 225 (these participants will be asked to attend additional follow-up visits at days 16 and 21 for further  
 226 sampling).

227 During the dose-ranging phase, nasal wash samples pre- and post-inoculation will be collected to  
 228 assess colonisation acquisition and density, by classical microbiological culture and molecular methods.  
 229 Additionally, serum samples will be taken at baseline, 13 and 28-days after inoculation, to measure  
 230 levels of anti-capsule polysaccharide immunoglobulin G (IgG). Nasal cell samples will be taken to  
 231 characterise cellular populations and dynamics by flow cytometry.

232 During reproducibility phase, nasal wash and nasal cell samples will be collected as in the dose-ranging  
 233 study. A viral swab will be collected pre-inoculation to test for viral co-infection. Nasal filters  
 234 (nasosorption) will be collected pre- and post-inoculation to assess mucosal inflammation using 30-plex  
 235 Luminex. Saliva samples will be taken pre- and post-inoculation to compare rates, density and duration  
 236 of SPN3 colonisation in saliva and nasopharyngeal samples. Peripheral blood mononuclear cells  
 237 (PBMCs) will be obtained at baseline, at 13-days and at 28-days post-inoculation. PBMCs will be used  
 238 to characterise memory B cell and other immune cell populations using flow-cytometry based methods.  
 239 Serum samples will be taken at baseline, 13 and 28 days after inoculation to measure levels of anti-  
 240 capsule polysaccharide IgG. Exhaled detection facemasks (EDF) will be collected at day 2, to allow  
 241 comparison against other shedding samples for detection of SPN3. A subgroup of participants who  
 242 have demonstrated colonisation with SPN3 at day 2 will undergo EDF sampling at day 7.

243 At the end of the study, study participants who have been positive for SPN3 colonisation at any time  
 244 point, and who have not subsequently had two consecutive negative nasal wash samples, will be asked  
 245 to take oral amoxicillin 500mg three times daily for 5 days with the aim to clear / assist with clearing of  
 246 colonisation.

### 247 **Participant Retention**

248 We will use an online booking system for appointments, to ensure that reminders are sent to participants  
 249 for each appointment. There are windows of 2 days around all appointments to allow participants to  
 250 move their appointments within window, if needed. Participants are remunerated on study completion.

### 251 **Data Collection Methods**

252 Samples will only be collected by staff members who are trained and delegated to do so. Table 3  
 253 describes the data collection methods.

### 254 **Table 3. Data Collection Methods**

|                               |                                                                                                                                                                                                                                                                                                                                                                                                                   |
|-------------------------------|-------------------------------------------------------------------------------------------------------------------------------------------------------------------------------------------------------------------------------------------------------------------------------------------------------------------------------------------------------------------------------------------------------------------|
| Determination of colonisation | Colonisation will be defined as result of nasal washes taken at 2, 7, 13, 16, 21 and 28-days post-inoculation. Nasal washes will be performed using the Naclerio method (14), which is a validated technique to collect nasal bacterial specimens. Nasal washes will be plated onto culture media. Colonies will be confirmed as SPN3 using classical microbiological techniques. Results from the cultured nasal |
|-------------------------------|-------------------------------------------------------------------------------------------------------------------------------------------------------------------------------------------------------------------------------------------------------------------------------------------------------------------------------------------------------------------------------------------------------------------|

|                                                    |                                                                                                                                                                                                                                                                                                                                                                                                                                                                                                                                                                                                                                                                                                                                                                                                                                                                                                                                   |
|----------------------------------------------------|-----------------------------------------------------------------------------------------------------------------------------------------------------------------------------------------------------------------------------------------------------------------------------------------------------------------------------------------------------------------------------------------------------------------------------------------------------------------------------------------------------------------------------------------------------------------------------------------------------------------------------------------------------------------------------------------------------------------------------------------------------------------------------------------------------------------------------------------------------------------------------------------------------------------------------------|
|                                                    | wash will also be confirmed using Polymerase Chain Reaction (PCR) based methods.                                                                                                                                                                                                                                                                                                                                                                                                                                                                                                                                                                                                                                                                                                                                                                                                                                                  |
| Molecular methods of determination of colonisation | DNA will be extracted from bacterial pellet post nasal wash sample centrifugation. SPN3 detection will be done by multiplex qPCR. This technique will enable us to detect individuals who are potential carriers with very low bacterial density. This multiplex qPCR is well validated in our laboratory (16).                                                                                                                                                                                                                                                                                                                                                                                                                                                                                                                                                                                                                   |
| Viral detection and quantification                 | Viral multiplex qPCR for detection and quantification will be performed on DNA and RNA of stored throat swab and/or nasal wash to detect all common respiratory viruses.                                                                                                                                                                                                                                                                                                                                                                                                                                                                                                                                                                                                                                                                                                                                                          |
| Mucosal and systemic immune responses              | Serotype-specific responses and their association with both acquisition and clearance of colonisation (density and duration) will be measured. We will compare antibody levels and function between those colonised and those protected against colonisation. Levels of immunoglobulin to the capsular polysaccharides SPN3 in serum and nasal washes before and after inoculation will be determined. Levels of SPN3-specific memory B cells will be assessed using PBMCs collected pre and post inoculation.<br><br>Flow cytometry will be used to examine the induction of antigen-specific cellular responses in blood including B cell and T cells. Mucosal cellular responses will also be measured by flow cytometry on nasal cell samples. Additionally, the mucosal inflammatory response associated with inoculation will be evaluated using 30-plex Luminex method to detect cytokines and chemokines in nasal filters |

### 255 **Sample Size Calculation**

256 We have adopted a step-wise approach to escalating the inoculation dose. The protocol is designed to:  
 257 a) minimise the possibility that we try repeatedly to attain colonisation at a dose in which it is unlikely to  
 258 happen; b) maximise safety by inoculating small groups before continuing onto larger groups (in which  
 259 we will have the statistical power to give reasonable precision of our estimate of colonisation rates).

260 Based on previous experience in studies of SPN6B and SPN3, we expect that with a colonisation rate  
 261 of 45%, with 95% confidence level, and a margin of error of 15%, our study will be complete  
 262 participants with a single inoculation dose. Depending on colonisation rates at different inoculum doses  
 263 of the SPN3 isolate, we need a minimum of 43 and a maximum of 93 participants to complete the study.  
 264 This allows for up to two isolates to be taken through to the highest dose of 80,000 CFU/100µL. For  
 265 example, if two isolates were tested at each dose in 10 participants in the dose ranging study, this would  
 266 equate to 60 participants. A further 33 participants would then take part in the reproducibility study,  
 267 equating to a total of 93 participants. To ensure that we complete the correct number of participants,  
 268 we will over-recruit to allow for screen failures and exclusion from primary outcome analysis for natural  
 269 colonisation and loss of participants due to drop out. Based on the assumption that two isolates will be  
 270 tested and estimating a 20% rate of drop out/screening failure, we will recruit a maximum of 117



1  
2  
3 271 participants. Participants who are natural SPN carriers will be included in analysis of exploratory  
4 272 outcomes.

### 6 273 **Statistical Analysis Plan**

7 274 This is an open label, non-randomised, safety and dose escalation study in healthy participants.  
8  
9 275 Analyses are descriptive.

### 11 276 **Timing of Analysis**

12 277 Data will be reviewed at the middle and the end of follow up for each cohort of 10 healthy participants  
13  
14 278 from the dose ranging phase as soon as database completion and lock occurs for that cohort. Data  
15  
16 279 reviewed after day 7 will be for targeted booster inoculations if participants have tested negative for  
17  
18 280 SPN3 on both days 2 and 7. Safety and outcome results will be reported to the trial steering committee  
19  
20 281 (TSC) and trial management group (TMG). Interim analysis in the dose ranging phase is to consider  
21  
22 282 addition of second inoculation dose. Analysis at the end of each cohort is to consider dose escalation  
23  
24 283 (or cessation). Once the dose has been selected we will complete then reproducibility study and final  
25  
26 284 analysis will be done on completion of that cohort after database completion and lock.

### 25 285 **Analysis Populations**

26 286 The intention to treat population is all participants who have been enrolled and who have received at  
27  
28 287 least one inoculation dose (ITT). The main analysis population for each cohort is the modified intention  
29  
30 288 to treat population (mITT), consisting of all participants who have been enrolled and received at least  
31  
32 289 one inoculation dose (D0) and have had at least one valid outcome assessment measure (nasal wash).  
33  
34 290 The safety analysis population is the ITT population and will include all participants who have received  
35  
36 291 at least one inoculation dose.

37  
38 292 Analysis will use available data. No imputation for missing endpoints will be performed.

### 38 293 **Covariates and Subgroups**

39 294 If targeted booster inoculations are given, the numbers and results of these will be described, including  
40  
41 295 a summary of colonisation after the second dose. Depending on the number receiving second doses,  
42  
43 296 and on the endpoint being analysed, the results after the second dose will either be included as a 'new'  
44  
45 297 inoculation event, potentially requiring adjustment for repeated measures, or will be excluded.  
46  
47 298 Immunological data will be described, using appropriate estimators for the characteristics of the variable  
48  
49 299 (arithmetic or multiplicative means, for example) and appropriate transformations as required. Where  
50  
51 300 appropriate, and in particular for the reproducibility cohort, regression models will be used to estimate  
52  
53 301 adjusted associations between strain and number of doses with colonisation as an outcome, and with  
54  
55 302 immunological response as an outcome.

### 53 303 **Interim Analysis and Data Monitoring**

54 304 Data will be reviewed on an ongoing basis for any safety or adverse events and will be reported per  
55  
56 305 protocol to the TSC and data and safety monitoring committee (DSMC). Efficacy outcomes will be  
57  
58 306 evaluated after day 7 to provide information on second dose and at the cohort completion to assist with  
59  
60 307 decision making for the next dose escalation in sequence. The reproducibility cohort will have a single  
308  
interim look, to evaluate second inoculation dose and a final analysis at the end of cohort follow up.

### 309 **Efficacy Analysis**

310 Each dose cohort (dose selection and reproducibility) will be analysed separately. Binary endpoints will  
311 be summarised as frequency (%) with 95% confidence estimates at each time point and by participant  
312 level summary. Density will be summarised using number, mean, geometric mean, standard deviation,  
313 geometric standard deviation, minimum and maximum at each time point. 95% confidence intervals will  
314 be estimated for geometric mean estimates. Duration of colonisation (days) will be analysed as a  
315 continuous variable and summarised using mean, standard deviation, minimum and maximum in the  
316 event of no censored outcomes. In the event of censoring, product limit methods will be used to estimate  
317 endpoints. The duration will be defined as the time between inoculation and the time of the last NW  
318 sample that is positive for colonisation. Symptom and sore through grading scales will be summarised  
319 by frequency (%). Agreement between colonisation results from microbiological culture and qPCR will  
320 be estimated using Bland-Altman plots and estimates of agreement.

321 The reproducibility cohort alone will use generalised linear models for single measurement outcomes  
322 (colonisation at any time vs not) under a binomial model with logit link to estimate odds ratio (95%  
323 confidence interval) for strain/procedure/one or two doses as independent variables. Censored  
324 endpoints (time to colonisation) will be analysed using product limit estimates of median (95%  
325 confidence interval for the time). Exploratory immunological outcomes will be summarised as above.

### 326 **Reporting Conventions**

327 P values > 0.0001 will be reported to 4 decimal places; p-values < 0.0001 will be reported as "< 0.0001".  
328 Distribution estimates such as mean, geometric mean, standard deviation, median and quartiles will be  
329 reported to 3 decimal places. Parameters estimates such as regression coefficients, confidence  
330 intervals and hazard ratios will be reported to three significant digits.

### 331 **Safety Reporting**

332 Adverse events (AEs) will be graded using the Division of AIDS (DAIDS) Table for Grading the Severity  
333 of Adult and Paediatric Adverse Events (20). If the severity of an AE could fall in either one of two  
334 grades, the higher of the two grades should be selected.

335 Symptoms experienced and attendance to hospital/GP will be asked about at each visit. Serious  
336 adverse events (SAEs) will be reported from the time of consent until completion of day 28 visit, or until  
337 completion of antibiotic treatment if participants require this.

338 All AEs will be recorded in the eCRF and documented in a weekly safety report. Adverse events of  
339 special interest (AESI) such as (but not limited to) headache, cough, sore throat and earache will be  
340 specifically documented and reported to the TMG, TSC and DSMC in the safety report.

341 All SAEs will be recorded on an SAE form and reported to the DSMC, Sponsor within 24 hours of  
342 discovery or notification of the event. All SAEs/AESIs will be followed until resolution/stabilisation or  
343 until the end of the participants last study visit. The DSMC will perform an independent review of SAEs.

1  
2  
3 344 **Auditing**

4 345 A Trial Monitoring Plan will be developed by the Sponsor and agreed by the TMG and CI based on the  
5 346 trial risk assessment. Following written standard operating procedures, the monitors will verify that the  
6 347 clinical trial is conducted, and data are generated, documented and reported in compliance with the  
7 348 protocol, good clinical practice and the applicable regulatory requirements.

10 349 **ETHICS AND DISSEMINATION**

11 350 **Research Ethics Committee Review**

12 351 This protocol has been reviewed by the sponsor, funder and an external peer review process. Ethical  
13 352 approval has been obtained from Liverpool Central Research Ethics Committee (REC) with REC  
14 353 reference number 22/NW/0051. The protocol, informed consent form, participant information leaflet  
15 354 (PIL) and any proposed advertising material has been approved by REC as well. For any amendment  
16 355 to the study, the CI, in agreement with the sponsor, will submit information to REC and other appropriate  
17 356 bodies. Amendments will be discussed with participants.

23 357 **Consent**

24 358 Potential participants will be sent a copy of the PIL (Supplemental Material 1) and invited to contact a  
25 359 member of the team if they would like to participate. They will then be invited to attend a presentation  
26 360 and to carry out a quiz to ensure they have understood the information given. If a participant has  
27 361 voluntarily agreed to take part in the research and the study team are satisfied that they meet the  
28 362 eligibility criteria, they will be invited to provide written informed consent with a delegated, trained  
29 363 member of staff (Supplemental Material 1). In line with recommended practice (MRC tissue and  
30 364 biological samples for use in research), participants will be asked to consent to gift their anonymised  
31 365 samples for use in future studies and shared with research collaborators and stored for any future  
32 366 commercial respiratory partnerships. This is outlined in the PIL and consent form.

38 367 **Data Management and Participant Confidentiality**

39 368 Study data will be recorded directly into REDcap, an Electronic Data Capture (EDC) system (21). Any  
40 369 additional information that needs recording but is not relevant for the case report form (CRF) will be  
41 370 recorded on a separate paper source document. The electronic CRF (eCRF) must be completed by  
42 371 designated and trained study personnel. Quality control will be performed on each eCRF. The  
43 372 processing of eCRFs will include an audit trail, to include changes made, reason for change, date of  
44 373 change and person making change.

48 374 Each participant will be assigned a unique, non-identifiable study number at recruitment for  
49 375 anonymisation. Unlinked non-identifiable clinical data will be stored and analysed at the LSTM, MSD or  
50 376 collaborating laboratories. Only authorised members of the clinical research team will be able to access  
51 377 participant personal information which is directly relevant to the study. All electronic records containing  
52 378 personal information will be stored in a password protected database on a password protected  
53 379 computer. Paper documentation containing personal information will be kept in a locked filing cabinet  
54 380 in a locked room. On completion of the study, the eCRF will be locked and source documents will be

1  
2  
3 381 photocopied and archived on paper and electronically in a secure database. This data will be stored for  
4 382 a minimum of 25 years. See Supplemental Material 2 for information on storage of biological specimens.

### 7 383 **Dissemination Policy**

8 384 The findings from this study will be disseminated amongst the scientific community. We intend to publish  
9 385 our findings in peer reviewed scientific journals and present data at appropriate local, national and  
10 386 international conferences. In addition, we will produce a report of our findings, which will be made  
11 387 available to all participants. Authorship of the final trial report and subsequent publications will include  
12 388 those who contribute to the design, delivery and analysis of the trial. Authorship will be defined on study  
13 389 completion in line with International Committee of Medical Journal Editors guidelines (22).

14 390 Regarding data sharing, we will hold exclusivity of participant data for 2 years, until all analysis and  
15 391 publications are complete. Deidentified individual participant data that underlie the results reported at  
16 392 the end of the trial will then be made available in an open format with accompanying metadata to the  
17 393 LSTM archive team, who can make it available on request. Researchers who provide a  
18 394 methodologically sound proposal will be able to request access, to achieve aims in the agreed proposal.  
19 395 Proposals may be submitted up to 5 years following publication of the results of this protocol. After 5  
20 396 years, the data will be available in LSTM archives but without investigator support.

### 21 397 **Patient and Public Involvement and Engagement**

22 398 This study is run in conjunction with the EHPC studies, which have been studying pneumococcal  
23 399 colonisation over the last 11 years. There are numerous opportunities for public and patient  
24 400 involvement: newsletters are sent out to all participants to inform them of the study results and further  
25 401 work, previous participants assist with recruitment events and social media accounts update followers  
26 402 about current studies and our ongoing work. For this study, we have asked participants from previous  
27 403 studies to review the Participant Information Leaflet and consent form, to ensure it is clear and easy to  
28 404 understand.

### 29 405 **ACKNOWLEDGEMENTS**

30 406 We would like to acknowledge the NIHR CRN North West Coast for providing clinical staff for this study.  
31 407 We would like to acknowledge Andrea Gori and Robert S Hyderman for providing the SPN3 strain from  
32 408 Malawi. We would also like to acknowledge members of the DSMC/TSC: Rob Read, Neil French, Marc  
33 409 Henrion and Chris Chiu.

34 410 We would also like to acknowledge the respiratory consultants in the Liverpool University Hospitals  
35 411 NHS Foundation Trust who provide on-call cover for this study: Drs Kimberley Barber, Livingstone  
36 412 Chishimba, Paul Deegan, Justine Hadcroft, Gareth Jones, Patricia Yunger, Hassan Burhan and Seher  
37 413 Zaidi

### 38 414 **AUTHOR CONTRIBUTIONS**

39 415 Study design set up: PH, RR, MF, CS, AHW, DMF, AMC, KL, ML, AH, TKN, SBG

40 416 Statistics: ML

41 417 Ethics application: PH, KD, MF, AMC

1  
2  
3 418 Study coordination: PH, CS, AHW, MF, KD, AMC, AB, JB, HF

4  
5 419 Clinical cover including on-call responsibility: KL, RR, PH, AMC, JB, HF, AB

6  
7 420 Writing the protocol: PH, MF, RR, CS, KL, KD, AHW, EM, BU, DMF, AMC, ML

8  
9 421 Bacterial selection, bacterial inoculum preparation: CS, AH, TKN, DES, SBG

10  
11 422 Manuscript writing RH, RR, MF, CS, AMC, DMF

12  
13 423 Manuscript review PH, RR, MF, CS, AMC, DMF, SBG, KL, AHW, AH, ML, AB, HF, KD, TKN, BU,  
14 424 SBG, DES

#### 15 425 **Funding statement**

16  
17 426 The study is supported in part by a research grant from Investigator-Initiated Studies Programme of  
18 427 Merck Sharp and Dohme LLC (MISP 61493). The opinions expressed in this paper are those of the  
19 428 authors and do not necessarily represent those of Merck Sharp and Dohme LLC.

#### 21 429 **Competing interests statement**

22  
23 430 Neither the CI nor any collaborator has any direct personal involvement in organisations sponsoring  
24 431 or funding the research that may give rise to a possible conflict of interest.

25  
26  
27 432

#### 28 433 **REFERENCES**

- 29  
30  
31 434 1 GLRI C. Estimates of the global, regional, and national morbidity, mortality, and aetiologies of  
32 435 lower respiratory infections in 195 countries, 1990-2016: a systematic analysis for the Global Burden  
33 436 of Disease Study 2016. . *Lancet Infect Dis*. 2018;18(11):1191-210.
- 34 437 2. German EL, Solórzano C, Sunny S et al. Protective effect of PCV vaccine against  
35 438 experimental pneumococcal challenge in adults is primarily mediated by controlling colonisation  
36 439 density. *Vaccine*. 2019;37(30):3953-6.
- 37 440 3. Levine OS, O'Brien KL, Knoll M et al. Pneumococcal vaccination in developing countries.  
38 441 *Lancet*. 2006;367(9526):1880-2.
- 39 442 4. Oligbu G, Collins S, Djennad A et al. Effect of Pneumococcal Conjugate Vaccines on  
40 443 Pneumococcal Meningitis, England and Wales, July 1, 2000-June 30, 2016. *Emerg Infect Dis*.  
41 444 2019;25(9):1708-18.
- 42 445 5. de Miguel S, Domenech M, González-Camacho F et al. Nationwide Trends of Invasive  
43 446 Pneumococcal Disease in Spain From 2009 Through 2019 in Children and Adults During the  
44 447 Pneumococcal Conjugate Vaccine Era. *Clinical Infectious Diseases*. 2020.
- 45 448 6. Amin-Chowdhury Z, Collins S, Sheppard C et al. Characteristics of Invasive Pneumococcal  
46 449 Disease Caused by Emerging Serotypes After the Introduction of the 13-Valent Pneumococcal  
47 450 Conjugate Vaccine in England: A Prospective Observational Cohort Study, 2014-2018. *Clin Infect Dis*.  
48 451 2020;71(8):e235-e43.
- 49 452 7. Dagan R, Patterson S, Juergens C et al. Comparative Immunogenicity and Efficacy of 13-  
50 453 Valent and 7-Valent Pneumococcal Conjugate Vaccines in Reducing Nasopharyngeal Colonization: A  
51 454 Randomized Double-Blind Trial. *Clinical Infectious Diseases*. 2013;57(7):952-62.
- 52 455 8. Ferreira DM, Jambo KC, Gordon SB. Experimental human pneumococcal carriage models for  
53 456 vaccine research. *Trends Microbiol*. 2011;19(9):464-70.
- 54 457 9. Gritzfeld JF, Cremers AJ, Ferwerda G et al. Density and duration of experimental human  
55 458 pneumococcal carriage. *Clin Microbiol Infect*. 2014;20(12):O1145-51.
- 56 459 10. Gritzfeld JF, Wright AD, Collins AM et al. Experimental human pneumococcal carriage. *J Vis*  
57 460 *Exp*. 2013(72).
- 58 461 11. Jochems SP, de Ruiter K, Solórzano C et al. Innate and adaptive nasal mucosal immune  
59 462 responses following experimental human pneumococcal colonization. *J Clin Invest*.  
60 463 2019;129(10):4523-38.
- 464 12. Jochems SP, Marcon F, Carniel BF et al. Inflammation induced by influenza virus impairs  
465 human innate immune control of pneumococcus. *Nature Immunology*. 2018;19(12):1299-308.

- 1  
2  
3 466 13. Mitsi E, Carniel B, Reiné J et al. Nasal Pneumococcal Density Is Associated with  
4 467 Microaspiration and Heightened Human Alveolar Macrophage Responsiveness to Bacterial  
5 468 Pathogens. *Am J Respir Crit Care Med*. 2020;201(3):335-47.  
6 469 14. Connor V, German E, Pojar S et al. Hands are vehicles for transmission of *Streptococcus*  
7 470 *pneumoniae* in novel controlled human infection study. *Eur Respir J*. 2018;52(4).  
8 471  
9 472 15. Musher DM. How contagious are common respiratory tract infections? *N Engl J Med*.  
10 473 2003;348(13):1256-66.  
11 474 16. Robinson RE, Mitsi E, Nikolaou E et al. Human Infection Challenge with Serotype 3  
12 475 *Pneumococcus*. *Am J Respir Crit Care Med*. 2022 Dec 1;206(11):1379-1392.  
13 476  
14 477 17. Weiser JN. The pneumococcus: why a commensal misbehaves. *J Mol Med (Berl)*.  
15 478 2010;88(2):97-102.  
16 479 18. Morton B, Burr S, Chikaonda T et al. A feasibility study of controlled human infection with  
17 480 *Streptococcus pneumoniae* in Malawi. *EBioMedicine*. 2021 Oct;72:103579.  
18  
19 481 19. Chan A-W, Tetzlaff JM, Gøtzsche PC et al. SPIRIT 2013 Explanation and Elaboration: Guidance  
20 482 for protocols of clinical trials. *BMJ*. 2013;346:e7586  
21  
22 483 20. National Institute of Allergy and Infectious Diseases. Division of AIDS Table for Grading the  
23 484 Severity of Adult and Pediatric Adverse Events. July 2021. Available from:  
24 485 <https://rsc.niaid.nih.gov/sites/default/files/daidsgradingcorrectedv21.pdf>  
25 486 21. PA Harris, R Taylor, R Thielke et al. Research electronic data capture (REDCap) – A  
26 487 metadata-driven methodology and workflow process for providing translational research informatics  
27 488 support, *J Biomed Inform*. 2009 Apr;42(2):377-81.  
28  
29 489 22. International Committee of Medical Journal Editors. Recommendations for the Conduct,  
30 490 Reporting, Editing, and Publication of Scholarly Work in Medical Journals. 2022 May.  
31 491

32  
33 492 Word Count (excluding abstract, article summary, tables and references) = 4480 words  
34 493 Abstract word count: 300 words  
35

### 36 494 37 38 495 **Figure Legend.**

#### 39 496 **Figure 1.** Trial Flow Chart

40  
41  
42 497 \*Isolate 2 may not be tested at the discretion of the Trial Steering Committee

43 498 **Figure 2.** A) Dose-Ranging study sampling schedule. B) Reproducibility sampling schedule.  
44 499 SPN *Streptococcus pneumoniae*, SPN3 *Streptococcus pneumoniae* serotype 3, CPS capsular  
45 500 polysaccharide, IgG Immunoglobulin G. Created with Biorender.com  
46  
47  
48  
49  
50  
51  
52  
53  
54  
55  
56  
57  
58  
59  
60



The dose may be escalated before a cohort of n=10 is inoculated, and subsequent escalated doses may be omitted if the colonisation rates are low. This is in the interest of not inoculating participants if it could be futile, and will be at the discretion of the CI

Reproducibility study with selected dose and isolate as decided by Trial Steering Committee  
(n=33)

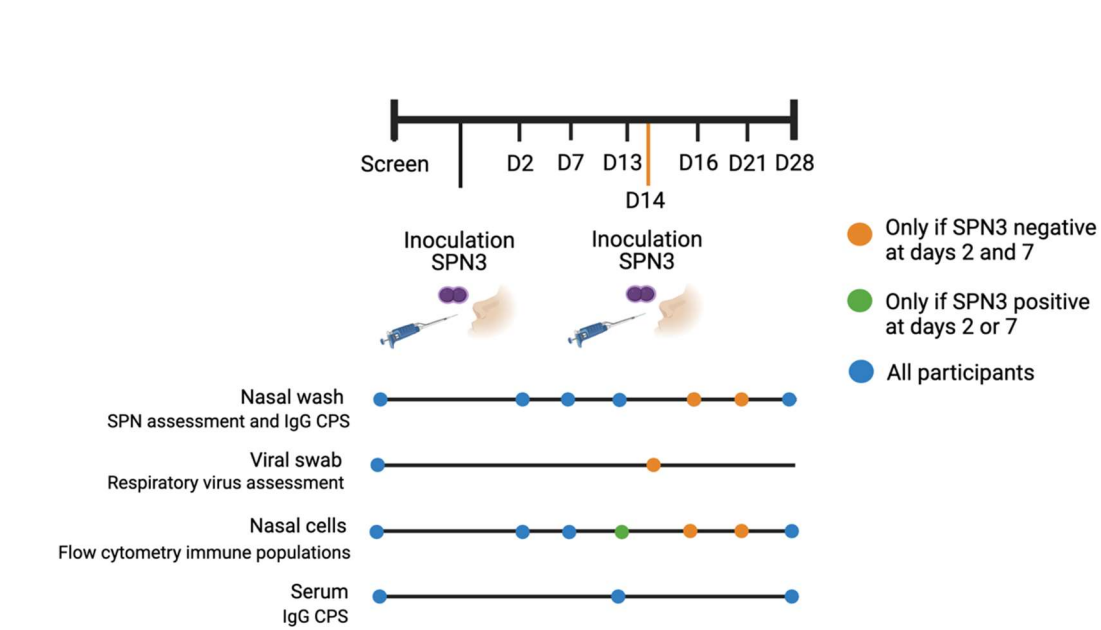

A)

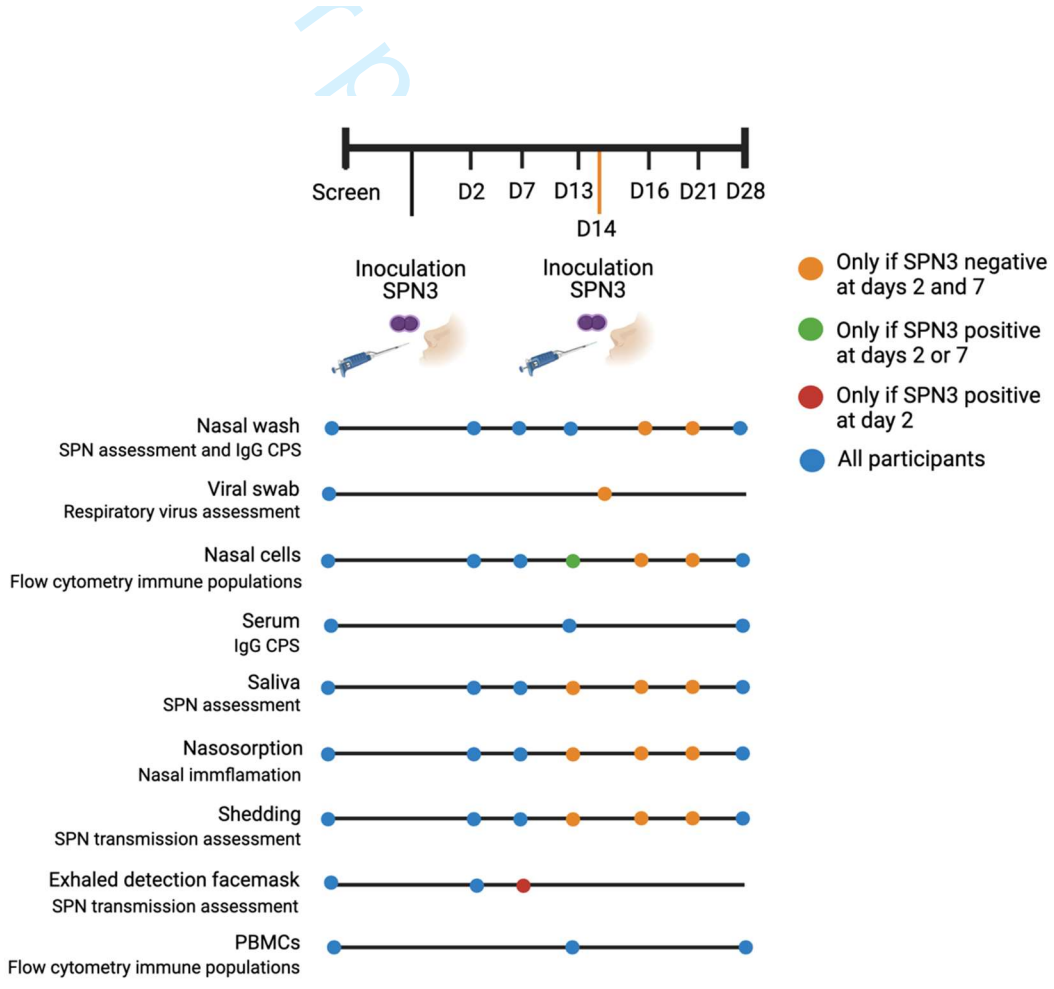

B)





## Experimental Human Pneumococcal Challenge Model (EHPC)

### Participant Information Leaflet (PIL)

## Challenge 3 Study:

This information leaflet tells you how you could take part in our research. Please ask a member of the team if you have questions. You may want to talk to other people about the study: please do so. Take your time to decide if you want to be involved.

#### What is the purpose of the study?

We are studying a bacteria called pneumococcus which are often found in the noses of healthy adults and children without causing any symptoms or disease. However, in some people, such as older age, chronically ill adults or very young children, it is more likely to cause illness. Mild infections with pneumococcus are very common, such as ear infections in children. Less frequently, the bacteria can infect the lung (causing pneumonia), the brain (causing meningitis) or the blood (causing sepsis). These more serious illnesses are very uncommon in healthy adults. It is thought that small numbers of this bacteria in the nose ("nasal colonisation") may actually protect against pneumococcal disease such as pneumonia.

The 'Experimental Human Pneumococcal challenge' (EHPC) model is a way of putting drops of bacteria into the nose. We have studied this model of putting bacteria in the nose safely in over 1500 volunteers over the past decade with no serious side effects. We will now use a different strain of the bacteria that is commonly found in the community, called SPN3, in this model.

The aim of this study is to determine how much pneumococcus is needed to achieve nasal colonisation and how long the bacteria live in the nose for before it is cleared by natural immunity. By doing this, we will then be able to test how well

future vaccines may work to prevent pneumococcal colonisation and ultimately pneumococcal infections such as pneumonia.

#### Do I have to take part?

No. Taking part in this study is voluntary.

#### Why have I been asked to take part?

We are looking for up to 117 participants aged 18-50 years old and that are fit and healthy. If we find any reason that you or your close contacts may be at higher risk of infection, then we will not ask you to take part.

#### The main reasons that you would not be able to take part:

- Current daily smoking (includes e-cigarettes) or significant history of smoking
- Currently involved in another study or involvement in EHPC studies in past year (3 years if involving SPN3)
- Received a pneumococcal vaccine (routine in UK if born since 2005)
- Allergy to Penicillin/ Amoxicillin
- Increased risk of infection due to chronic condition or medication
- Long term use of antibiotics
- Pregnancy or trying to conceive
- History of drug or alcohol abuse
- Directly caring for someone who has lower immune levels (patients, children under 5, the elderly) without personal protective equipment
- Overseas travel planned in follow up period

## Experimental Human Pneumococcal Challenge Model (EHPC)

### What happens if I choose to take part?

If you choose to take part in this study and the research team agrees that you are eligible, you will be asked to sign the consent form.

The study will involve 8-9 clinic visits over approximately 4-5 weeks.

### What samples do you take and what are the risks?

**Nasal wash:** We gently squirt a little salty water into your nose. After a few seconds the water runs out into a sample bowl. This will tell us about the bacteria in your nose and your immune response.

*Risk: may swallow some salty water, temporary discomfort.*

**Throat swab(s):** We take a small cotton swab and wipe the back of your throat in a circular motion. This is used to detect bacteria and viruses in your throat.

*Risk: might make you gag a little.*

**Nasosorption:** To collect cells from your nose we place a small piece of paper into your nostril for two minutes.

*Risk: Little if any discomfort*

**Nasal cells:** We insert a very small plastic spoon (like a tooth pick) to collect cells from inside the nose. We will perform this twice on each nostril.

*Risk: Temporary discomfort, eyes watering, spots of blood from the scrape.*

**Blood samples:** We take a blood sample from a vein in your arm (using a needle). We will take up to 80mL (about the same as 8 tablespoons) during a visit. This amount of blood is safe to give, and your body will replace this blood quickly.

*Risk: some people may feel faint or experience bruising.*

**Shedding:** We use gentle methods to find out if bacteria move from the nose to the hand. For example a swab of your hand after rubbing your nose or coughing onto a plate that is used to grow bacteria.

**Exhaled Detection Facemask:** You wear a facemask with a special filter for 15 minutes

*Risk: Can feel claustrophobic*

**Saliva:** We will ask you to spit into a tube to provide approx 1ml.

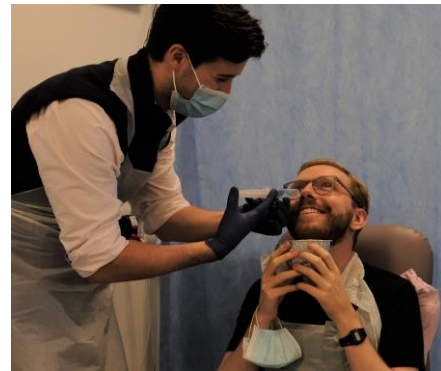

Fig 1. Nasal Wash

The risks that you should consider *before* participation in this study are the risks associated with having blood taken, nasal sampling as listed above and inoculation with live bacteria.

**Inoculation with pneumococcal bacteria:** Because the bacteria are alive, there is a very small risk of infection to you or your close contacts. There is a low risk of middle ear infection and very low risk of sinusitis, pneumonia, meningitis or sepsis. The study is designed to ensure any risk is minimal and we do not expect anyone to develop an infection; we choose participants carefully and monitor them closely. We have experience of using this model safely in more than 1500 healthy participants with no serious side effects. We provide a safety pack as described above and access to the research team by phone 24/7. We give you a separate leaflet which explains the

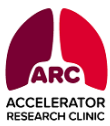

## Experimental Human Pneumococcal Challenge Model (EHPC)

safety precautions and what to do if you feel unwell.

- A course of antibiotics to keep with you in case you are unwell
- A thermometer to check your temperature at home
- A safety information sheet
- A study contact card
- A symptom log

### What will happen at each visit?

This study involves 6-9 visits to the research clinic. Each appointment takes between 10 minutes up to a maximum of 60 minutes.

#### Consent

A member of the research team will discuss the study involvement with you, this may be done as a group presentation. You will then have the opportunity to ask questions and discuss the study with the researcher in private. If you choose to take part in the study, you will be asked to complete a questionnaire to demonstrate that you understand the study involvement before signing a consent form. We will inform your GP that you are taking part in the study.

#### Screening

This will take approximately 30 minutes. We will ask routine questions about your medical health and we will listen to your heart and lungs to make sure you are fit and well. At this visit, a number of samples will be taken which may include throat swabs (including a COVID-19 test), nasal wash, bloods, nasal scrapes, nasosorption and shedding samples.

#### Inoculation Visit

We use a dropper (pipette) to put a few drops of water containing a small number of pneumococcal bacteria into each nostril (inoculation). You will lie down in the clinic for 15 minutes after the procedure. Usually participants have no symptoms afterwards. There will be a doctor or nurse available by telephone 24 hours a day, 7 days a week to answer questions. We will give you a safety pack to keep with you throughout the study, this includes:

We will ask that you inform us of your temperature and symptoms daily for the next 3-5 days.

#### Clinic appointment visits

At each visit, a number of samples will be taken which may include throat swab(s), nasal wash, bloods, nasosorption, shedding, saliva and nasal cell samples.

#### End of the study

Participants that are carriers of pneumococcal bacteria at any time point, who do not go on to have negative samples, will be asked to take the antibiotics (amoxicillin 500mg 3 times per day for 5 days) from the safety pack to clear/ reduce the amount of the pneumococcus in the nose.

#### Appointment Flow Chart

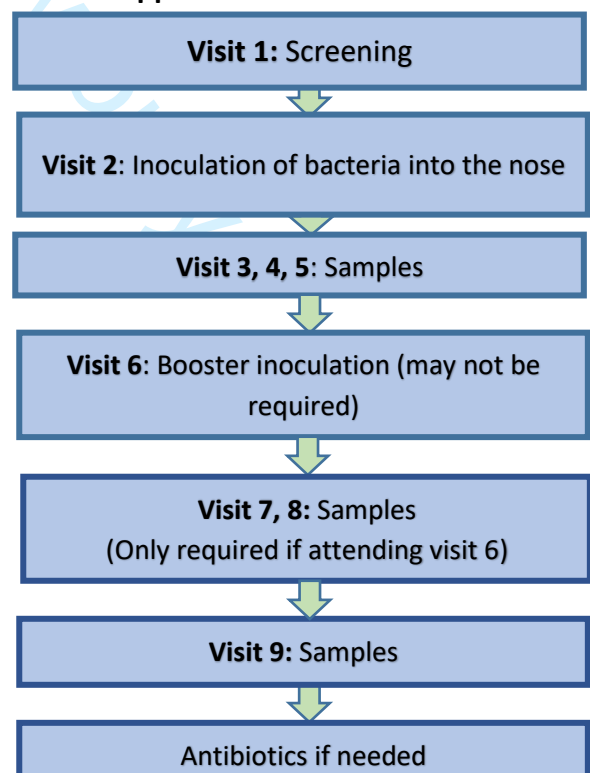



## Experimental Human Pneumococcal Challenge Model (EHPC)

### What are the benefits of taking part?

You will be a valuable part of a research study that we hope will eventually lead to the development of new methods to prevent respiratory infections through vaccination. You will not gain any direct benefit other than a health check.

### What if there is a problem?

You can contact the research team 24 hours a day by phone to answer any questions. Any medical care you need will be provided by the NHS.

### What about the risk of COVID-19?

The bacteria in this study does not increase your risk of developing COVID-19 infection. To reduce the risk of COVID-19 when attending for your clinic visits the latest UK Health Security Agency guidance for 'infection prevention and control for COVID-19' will be strictly followed and you will be advised of any specific measures to be taken closer to your appointment. A swab to check for COVID-19 infection may be performed at your appointments. If you were to develop symptoms that are suggestive of COVID-19 infection (fever, cough, shortness of breath, loss of sense of smell or taste) you will be advised to follow the latest UKHSA guidance with regards to self-isolation and if required seek urgent medical attention via normal routes of healthcare.

### What if I wish to complain?

If you wish to complain about any aspect of the study, you can contact the study doctor or nurse. You can also contact the sponsor by email on [lstmgov@lstmed.ac.uk](mailto:lstmgov@lstmed.ac.uk) or telephone on 0151 702 9396. Complaining will not affect the medical care you receive now or in the future.

The study is sponsored by the Liverpool School of Tropical Medicine (LSTM) and is covered by Clinical Trial Insurance.

### How much will I get paid?

The money you are paid is compensation for inconvenience, loss of income, and possible discomfort. Payments are as seen in the table below.

You will be paid between £170 and £285 for taking part in this study depending on how many visits are required and how many samples are taken on each visit

\*these visits may not be required

| Visit                       | Payment     |
|-----------------------------|-------------|
| Screen/Re-screen            | £40         |
| Inoculation                 | £40         |
| Day 2                       | £20-£35     |
| Day 7                       | £20-£35     |
| Day 13                      | £20-£30     |
| Booster inoculation Day 14* | £40*        |
| Day 16*                     | £20-£25*    |
| Day 21*                     | £20-£25*    |
| Day 28                      | £25-£30     |
| <b>Minimum total:</b>       | <b>£170</b> |
| <b>Maximum Total</b>        | <b>£285</b> |

### What if I change my mind, or want to stop?

If you do start the study, you are free to stop at any time without giving a reason. If you decide not to take part, or to withdraw from the study, this will have no effect on your future health care.

If you decide to stop, or if you lose capacity to consent during the study, we will continue to use the samples that have already been taken and information that we have already collected unless you ask us not to. You will be paid for the visits completed up to that point.

The study team may stop your involvement in the study for safety reasons.



## Experimental Human Pneumococcal Challenge Model (EHPC)

### Will my details be kept confidential?

Yes. For safety, we collect contact details and information about your medical history before you take part.

We will ask your permission to inform your GP that you are taking part in the study as this may be relevant to your medical care outside of the study.

We do not expect to find anything which would affect your health care. If we do, we will let you and your GP know about it.

We will also collect information that allows us to understand more about the samples, for example, your age or sex. This will be stored on a password protected database and/or in a locked cupboard. This data may be used by LSTM researchers who need to contact you or record relevant information about the study.

Your medical notes and research data may be viewed by regulatory teams who assess the quality of the research. This is to ensure that it is conducted in accordance with Good Clinical Practice guidelines.

All data will be collected and stored at the LSTM for a minimum period of 25 years. This includes

data such as your name and contact details. We use this to check if participants have already taken part in our research. We will also send newsletters and inform you about future studies.

You can find out more about how we use your information by contacting [dataprotection@lstmed.ac.uk](mailto:dataprotection@lstmed.ac.uk).

### What will happen to my samples?

The samples taken during this study will be processed and stored in the LSTM. All samples will be anonymised at the point of sampling, the people analysing the samples and data will not have access to your personal information. The samples that you give will be gifted for future use in respiratory/infection research and stored in a research tissue bank after the study has closed. The stored samples will be analysed as and when new technology becomes available or when new scientific questions arise relating to protection and susceptibility of respiratory disease. Samples may be sent to national and international collaborating laboratories for their expertise. All identifiable information will be removed.

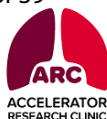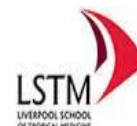

## Experimental Human Pneumococcal Challenge Model (EHPC)

### Contact details

General questions: please contact the research team on

**07740 410 290**

during normal working hours.

Web site: <https://www.lstmed.ac.uk/arc-volunteer-database>

**Emergency contact details at any time day or night: Mobile: 07912 053 981**

The Chief Investigator for this study is **Dr Andrea Collins**. You may contact her at the Liverpool School of Tropical Medicine, Liverpool Life Sciences Accelerator Building, 1 Daulby Street, Liverpool, L7 8XZ, UK. Telephone: **0151 702 9439**.

This research is sponsored by the Liverpool School of Tropical Medicine. It is funded by Merck. The research has been reviewed for scientific content by an external panel. The National Research Ethics Service Committee Liverpool Central has reviewed the study and given approval for it to take place.

**Data protection:** *If you withdraw from the study, we will keep the information about you that we have already obtained. To safeguard your rights, we will use the minimum personally-identifiable information possible.*

**Data access:** *The only people in LSTM who will have access to information that identifies you will be people who need to contact you to regarding your participation in the research or audit the data collection process. LSTM will use your name, NHS number and contact details to contact you about the research study, and make sure that relevant information about the study is recorded for your care, and to oversee the quality of the study. Individuals from LSTM and regulatory organisations may look at your medical and research records to check the accuracy of the research study. LSTM (research site) will pass these details to LSTM (sponsor) along with the information collected from you and your medical records. The people who analyse the information will not be able to identify you and will not be able to find out your name, NHS number or contact details.*

*LSTM (research site) will keep identifiable information about you from this study for a minimum of 5 years after the study has finished.*

**Information for research:** *The information will only be used for the purpose of research and cannot be used to contact you or to affect your health care. It will not be used to make decisions about future services available to you, such as insurance.*





## Experimental Human Pneumococcal Challenge Model (EHPC)

Copies: 1 for participant, original for site file and one scanned or filed in research case notes

For peer review only



## Supplemental Material 2. Biological Specimens

Biological samples are collected from all participants, transferred to the laboratory with an accompanying inventory form and stored, following local standard operating procedures.

The samples are “anonymised” with a participant number at the point of collection. Anonymised samples may be sent to national and international collaborators for further analysis, as detailed in the participant consent form. LSTM may store samples for up to 25yrs. After this time, the remaining samples will be transferred to a research tissue bank (LSTM).

For peer review only

# Reporting checklist for protocol of a clinical trial.

Based on the SPIRIT guidelines.

## Instructions to authors

Complete this checklist by entering the page numbers from your manuscript where readers will find each of the items listed below.

Your article may not currently address all the items on the checklist. Please modify your text to include the missing information. If you are certain that an item does not apply, please write "n/a" and provide a short explanation.

Upload your completed checklist as an extra file when you submit to a journal.

In your methods section, say that you used the SPIRIT reporting guidelines, and cite them as:

Chan A-W, Tetzlaff JM, Gøtzsche PC, Altman DG, Mann H, Berlin J, Dickersin K, Hróbjartsson A, Schulz KF, Parulekar WR, Krleža-Jerić K, Laupacis A, Moher D. SPIRIT 2013 Explanation and Elaboration: Guidance for protocols of clinical trials. *BMJ*. 2013;346:e7586

|                                   |                     |                                                                                                              | Page   |
|-----------------------------------|---------------------|--------------------------------------------------------------------------------------------------------------|--------|
|                                   |                     | Reporting Item                                                                                               | Number |
| <b>Administrative information</b> |                     |                                                                                                              |        |
| Title                             | <a href="#">#1</a>  | Descriptive title identifying the study design, population, interventions, and, if applicable, trial acronym | 1      |
| Trial registration                | <a href="#">#2a</a> | Trial identifier and registry name. If not yet registered,                                                   | 2      |

|    |                     |                                                                             |                |
|----|---------------------|-----------------------------------------------------------------------------|----------------|
| 1  |                     | name of intended registry                                                   |                |
| 2  |                     |                                                                             |                |
| 3  |                     |                                                                             |                |
| 4  | Trial registration: | <a href="#">#2b</a> All items from the World Health Organization Trial      | 1, 2, 4, 6, 7, |
| 5  |                     |                                                                             |                |
| 6  | data set            | Registration Data Set                                                       | 8, 9, 12, 15,  |
| 7  |                     |                                                                             |                |
| 8  |                     |                                                                             | 16             |
| 9  |                     |                                                                             |                |
| 10 |                     |                                                                             |                |
| 11 | Protocol version    | <a href="#">#3</a> Date and version identifier                              | 2              |
| 12 |                     |                                                                             |                |
| 13 |                     |                                                                             |                |
| 14 | Funding             | <a href="#">#4</a> Sources and types of financial, material, and other      | 18             |
| 15 |                     |                                                                             |                |
| 16 |                     | support                                                                     |                |
| 17 |                     |                                                                             |                |
| 18 |                     |                                                                             |                |
| 19 | Roles and           | <a href="#">#5a</a> Names, affiliations, and roles of protocol contributors | Supp for       |
| 20 |                     |                                                                             |                |
| 21 | responsibilities:   |                                                                             | editors        |
| 22 |                     |                                                                             |                |
| 23 | contributorship     |                                                                             |                |
| 24 |                     |                                                                             |                |
| 25 |                     |                                                                             |                |
| 26 |                     |                                                                             |                |
| 27 | Roles and           | <a href="#">#5b</a> Name and contact information for the trial sponsor      | 1              |
| 28 |                     |                                                                             |                |
| 29 | responsibilities:   |                                                                             |                |
| 30 |                     |                                                                             |                |
| 31 | sponsor contact     |                                                                             |                |
| 32 |                     |                                                                             |                |
| 33 | information         |                                                                             |                |
| 34 |                     |                                                                             |                |
| 35 |                     |                                                                             |                |
| 36 |                     |                                                                             |                |
| 37 | Roles and           | <a href="#">#5c</a> Role of study sponsor and funders, if any, in study     | Supp for       |
| 38 |                     |                                                                             |                |
| 39 | responsibilities:   | design; collection, management, analysis, and                               | editors        |
| 40 |                     |                                                                             |                |
| 41 | sponsor and funder  | interpretation of data; writing of the report; and the                      |                |
| 42 |                     |                                                                             |                |
| 43 |                     | decision to submit the report for publication, including                    |                |
| 44 |                     |                                                                             |                |
| 45 |                     | whether they will have ultimate authority over any of                       |                |
| 46 |                     |                                                                             |                |
| 47 |                     | these activities                                                            |                |
| 48 |                     |                                                                             |                |
| 49 |                     |                                                                             |                |
| 50 |                     |                                                                             |                |
| 51 | Roles and           | <a href="#">#5d</a> Composition, roles, and responsibilities of the         | Supp for       |
| 52 |                     |                                                                             |                |
| 53 | responsibilities:   | coordinating centre, steering committee, endpoint                           | editors        |
| 54 |                     |                                                                             |                |
| 55 | committees          | adjudication committee, data management team, and                           |                |
| 56 |                     |                                                                             |                |
| 57 |                     |                                                                             |                |
| 58 |                     |                                                                             |                |
| 59 |                     |                                                                             |                |
| 60 |                     |                                                                             |                |

other individuals or groups overseeing the trial, if applicable (see Item 21a for data monitoring committee)

## Introduction

|                                                  |                     |                                                                                                                                                                                                            |                          |
|--------------------------------------------------|---------------------|------------------------------------------------------------------------------------------------------------------------------------------------------------------------------------------------------------|--------------------------|
| Background and rationale                         | <a href="#">#6a</a> | Description of research question and justification for undertaking the trial, including summary of relevant studies (published and unpublished) examining benefits and harms for each intervention         | 4-6                      |
| Background and rationale: choice of comparators  | <a href="#">#6b</a> | Explanation for choice of comparators                                                                                                                                                                      | N/A – no comparator used |
| Objectives                                       | <a href="#">#7</a>  | Specific objectives or hypotheses                                                                                                                                                                          | 6-8                      |
| Trial design                                     | <a href="#">#8</a>  | Description of trial design including type of trial (eg, parallel group, crossover, factorial, single group), allocation ratio, and framework (eg, superiority, equivalence, non-inferiority, exploratory) | 5                        |
| <b>Methods:</b>                                  |                     |                                                                                                                                                                                                            |                          |
| <b>Participants, interventions, and outcomes</b> |                     |                                                                                                                                                                                                            |                          |
| Study setting                                    | <a href="#">#9</a>  | Description of study settings (eg, community clinic, academic hospital) and list of countries where data will be collected. Reference to where list of study sites can                                     | 6                        |

|    |                      |                                                                             |       |
|----|----------------------|-----------------------------------------------------------------------------|-------|
| 1  |                      | be obtained                                                                 |       |
| 2  |                      |                                                                             |       |
| 3  |                      |                                                                             |       |
| 4  | Eligibility criteria | <a href="#">#10</a> Inclusion and exclusion criteria for participants. If   | 8-10  |
| 5  |                      | applicable, eligibility criteria for study centres and                      |       |
| 6  |                      | individuals who will perform the interventions (eg,                         |       |
| 7  |                      | surgeons, psychotherapists)                                                 |       |
| 8  |                      |                                                                             |       |
| 9  |                      |                                                                             |       |
| 10 |                      |                                                                             |       |
| 11 |                      |                                                                             |       |
| 12 |                      |                                                                             |       |
| 13 | Interventions:       | <a href="#">#11a</a> Interventions for each group with sufficient detail to | 10-11 |
| 14 | description          | allow replication, including how and when they will be                      |       |
| 15 |                      | administered                                                                |       |
| 16 |                      |                                                                             |       |
| 17 |                      |                                                                             |       |
| 18 |                      |                                                                             |       |
| 19 |                      |                                                                             |       |
| 20 |                      |                                                                             |       |
| 21 | Interventions:       | <a href="#">#11b</a> Criteria for discontinuing or modifying allocated      | 10    |
| 22 | modifications        | interventions for a given trial participant (eg, drug dose                  |       |
| 23 |                      | change in response to harms, participant request, or                        |       |
| 24 |                      | improving / worsening disease)                                              |       |
| 25 |                      |                                                                             |       |
| 26 |                      |                                                                             |       |
| 27 |                      |                                                                             |       |
| 28 |                      |                                                                             |       |
| 29 |                      |                                                                             |       |
| 30 |                      |                                                                             |       |
| 31 | Interventions:       | <a href="#">#11c</a> Strategies to improve adherence to intervention        | 12    |
| 32 | adherence            | protocols, and any procedures for monitoring                                |       |
| 33 |                      | adherence (eg, drug tablet return; laboratory tests)                        |       |
| 34 |                      |                                                                             |       |
| 35 |                      |                                                                             |       |
| 36 |                      |                                                                             |       |
| 37 |                      |                                                                             |       |
| 38 |                      |                                                                             |       |
| 39 | Interventions:       | <a href="#">#11d</a> Relevant concomitant care and interventions that are   | 9     |
| 40 | concomitant care     | permitted or prohibited during the trial                                    |       |
| 41 |                      |                                                                             |       |
| 42 |                      |                                                                             |       |
| 43 |                      |                                                                             |       |
| 44 | Outcomes             | <a href="#">#12</a> Primary, secondary, and other outcomes, including the   | 6-8   |
| 45 |                      | specific measurement variable (eg, systolic blood                           |       |
| 46 |                      | pressure), analysis metric (eg, change from baseline,                       |       |
| 47 |                      | final value, time to event), method of aggregation (eg,                     |       |
| 48 |                      | median, proportion), and time point for each outcome.                       |       |
| 49 |                      | Explanation of the clinical relevance of chosen efficacy                    |       |
| 50 |                      | and harm outcomes is strongly recommended                                   |       |
| 51 |                      |                                                                             |       |
| 52 |                      |                                                                             |       |
| 53 |                      |                                                                             |       |
| 54 |                      |                                                                             |       |
| 55 |                      |                                                                             |       |
| 56 |                      |                                                                             |       |
| 57 |                      |                                                                             |       |
| 58 |                      |                                                                             |       |
| 59 |                      |                                                                             |       |
| 60 |                      |                                                                             |       |

|    |                           |                      |                                                           |               |
|----|---------------------------|----------------------|-----------------------------------------------------------|---------------|
| 1  | Participant timeline      | <a href="#">#13</a>  | Time schedule of enrolment, interventions (including      | 10-11,        |
| 2  |                           |                      | any run-ins and washouts), assessments, and visits for    | Figures1-3    |
| 3  |                           |                      | participants. A schematic diagram is highly               |               |
| 4  |                           |                      | recommended (see Figure)                                  |               |
| 5  |                           |                      |                                                           |               |
| 6  |                           |                      |                                                           |               |
| 7  |                           |                      |                                                           |               |
| 8  |                           |                      |                                                           |               |
| 9  |                           |                      |                                                           |               |
| 10 |                           |                      |                                                           |               |
| 11 | Sample size               | <a href="#">#14</a>  | Estimated number of participants needed to achieve        | 12-13         |
| 12 |                           |                      | study objectives and how it was determined, including     |               |
| 13 |                           |                      | clinical and statistical assumptions supporting any       |               |
| 14 |                           |                      | sample size calculations                                  |               |
| 15 |                           |                      |                                                           |               |
| 16 |                           |                      |                                                           |               |
| 17 |                           |                      |                                                           |               |
| 18 |                           |                      |                                                           |               |
| 19 |                           |                      |                                                           |               |
| 20 |                           |                      |                                                           |               |
| 21 | Recruitment               | <a href="#">#15</a>  | Strategies for achieving adequate participant enrolment   | 10            |
| 22 |                           |                      | to reach target sample size                               |               |
| 23 |                           |                      |                                                           |               |
| 24 |                           |                      |                                                           |               |
| 25 |                           |                      |                                                           |               |
| 26 | <b>Methods:</b>           |                      |                                                           |               |
| 27 |                           |                      |                                                           |               |
| 28 | <b>Assignment of</b>      |                      |                                                           |               |
| 29 | <b>interventions (for</b> |                      |                                                           |               |
| 30 | <b>controlled trials)</b> |                      |                                                           |               |
| 31 |                           |                      |                                                           |               |
| 32 |                           |                      |                                                           |               |
| 33 |                           |                      |                                                           |               |
| 34 |                           |                      |                                                           |               |
| 35 |                           |                      |                                                           |               |
| 36 | Allocation: sequence      | <a href="#">#16a</a> | Method of generating the allocation sequence (eg,         | N/A – no      |
| 37 | generation                |                      | computer-generated random numbers), and list of any       | blinding used |
| 38 |                           |                      | factors for stratification. To reduce predictability of a |               |
| 39 |                           |                      | random sequence, details of any planned restriction       |               |
| 40 |                           |                      | (eg, blocking) should be provided in a separate           |               |
| 41 |                           |                      | document that is unavailable to those who enrol           |               |
| 42 |                           |                      | participants or assign interventions                      |               |
| 43 |                           |                      |                                                           |               |
| 44 |                           |                      |                                                           |               |
| 45 |                           |                      |                                                           |               |
| 46 |                           |                      |                                                           |               |
| 47 |                           |                      |                                                           |               |
| 48 |                           |                      |                                                           |               |
| 49 |                           |                      |                                                           |               |
| 50 |                           |                      |                                                           |               |
| 51 |                           |                      |                                                           |               |
| 52 |                           |                      |                                                           |               |
| 53 | Allocation                | <a href="#">#16b</a> | Mechanism of implementing the allocation sequence         | N/A – no      |
| 54 | concealment               |                      | (eg, central telephone; sequentially numbered, opaque,    | blinding used |
| 55 |                           |                      | sealed envelopes), describing any steps to conceal the    |               |
| 56 |                           |                      |                                                           |               |
| 57 |                           |                      |                                                           |               |
| 58 |                           |                      |                                                           |               |
| 59 |                           |                      |                                                           |               |
| 60 |                           |                      |                                                           |               |

|    |                        |                                                                            |               |
|----|------------------------|----------------------------------------------------------------------------|---------------|
| 1  |                        | sequence until interventions are assigned                                  |               |
| 2  |                        |                                                                            |               |
| 3  |                        |                                                                            |               |
| 4  | Allocation:            | <a href="#">#16c</a> Who will generate the allocation sequence, who will   | N/A – no      |
| 5  |                        |                                                                            |               |
| 6  | implementation         | enrol participants, and who will assign participants to                    | blinding used |
| 7  |                        |                                                                            |               |
| 8  |                        | interventions                                                              |               |
| 9  |                        |                                                                            |               |
| 10 |                        |                                                                            |               |
| 11 | Blinding (masking)     | <a href="#">#17a</a> Who will be blinded after assignment to interventions | N/A – no      |
| 12 |                        |                                                                            |               |
| 13 |                        | (eg, trial participants, care providers, outcome                           | blinding used |
| 14 |                        |                                                                            |               |
| 15 |                        | assessors, data analysts), and how                                         |               |
| 16 |                        |                                                                            |               |
| 17 |                        |                                                                            |               |
| 18 |                        |                                                                            |               |
| 19 | Blinding (masking):    | <a href="#">#17b</a> If blinded, circumstances under which unblinding is   | N/A – no      |
| 20 |                        |                                                                            |               |
| 21 | emergency              | permissible, and procedure for revealing a participant's                   | blinding used |
| 22 |                        |                                                                            |               |
| 23 | unblinding             | allocated intervention during the trial                                    |               |
| 24 |                        |                                                                            |               |
| 25 |                        |                                                                            |               |
| 26 | <b>Methods: Data</b>   |                                                                            |               |
| 27 |                        |                                                                            |               |
| 28 | <b>collection,</b>     |                                                                            |               |
| 29 |                        |                                                                            |               |
| 30 | <b>management, and</b> |                                                                            |               |
| 31 |                        |                                                                            |               |
| 32 | <b>analysis</b>        |                                                                            |               |
| 33 |                        |                                                                            |               |
| 34 |                        |                                                                            |               |
| 35 |                        |                                                                            |               |
| 36 | Data collection plan   | <a href="#">#18a</a> Plans for assessment and collection of outcome,       | 12            |
| 37 |                        |                                                                            |               |
| 38 |                        | baseline, and other trial data, including any related                      |               |
| 39 |                        |                                                                            |               |
| 40 |                        | processes to promote data quality (eg, duplicate                           |               |
| 41 |                        |                                                                            |               |
| 42 |                        | measurements, training of assessors) and a description                     |               |
| 43 |                        |                                                                            |               |
| 44 |                        | of study instruments (eg, questionnaires, laboratory                       |               |
| 45 |                        |                                                                            |               |
| 46 |                        | tests) along with their reliability and validity, if known.                |               |
| 47 |                        |                                                                            |               |
| 48 |                        | Reference to where data collection forms can be found,                     |               |
| 49 |                        |                                                                            |               |
| 50 |                        | if not in the protocol                                                     |               |
| 51 |                        |                                                                            |               |
| 52 |                        |                                                                            |               |
| 53 |                        |                                                                            |               |
| 54 |                        |                                                                            |               |
| 55 | Data collection plan:  | <a href="#">#18b</a> Plans to promote participant retention and complete   | 12            |
| 56 |                        |                                                                            |               |
| 57 | retention              | follow-up, including list of any outcome data to be                        |               |
| 58 |                        |                                                                            |               |
| 59 |                        |                                                                            |               |
| 60 |                        |                                                                            |               |

|    |                            |                                                                             |          |
|----|----------------------------|-----------------------------------------------------------------------------|----------|
| 1  |                            | collected for participants who discontinue or deviate                       |          |
| 2  |                            |                                                                             |          |
| 3  |                            | from intervention protocols                                                 |          |
| 4  |                            |                                                                             |          |
| 5  |                            |                                                                             |          |
| 6  | Data management            | <a href="#">#19</a> Plans for data entry, coding, security, and storage,    | 16       |
| 7  |                            |                                                                             |          |
| 8  |                            | including any related processes to promote data quality                     |          |
| 9  |                            |                                                                             |          |
| 10 |                            | (eg, double data entry; range checks for data values).                      |          |
| 11 |                            |                                                                             |          |
| 12 |                            | Reference to where details of data management                               |          |
| 13 |                            |                                                                             |          |
| 14 |                            | procedures can be found, if not in the protocol                             |          |
| 15 |                            |                                                                             |          |
| 16 |                            |                                                                             |          |
| 17 |                            |                                                                             |          |
| 18 | Statistics: outcomes       | <a href="#">#20a</a> Statistical methods for analysing primary and          | 13-14    |
| 19 |                            |                                                                             |          |
| 20 |                            | secondary outcomes. Reference to where other details                        |          |
| 21 |                            |                                                                             |          |
| 22 |                            | of the statistical analysis plan can be found, if not in the                |          |
| 23 |                            |                                                                             |          |
| 24 |                            | protocol                                                                    |          |
| 25 |                            |                                                                             |          |
| 26 |                            |                                                                             |          |
| 27 |                            |                                                                             |          |
| 28 | Statistics: additional     | <a href="#">#20b</a> Methods for any additional analyses (eg, subgroup and  | 13-14    |
| 29 |                            |                                                                             |          |
| 30 | analyses                   | adjusted analyses)                                                          |          |
| 31 |                            |                                                                             |          |
| 32 |                            |                                                                             |          |
| 33 | Statistics: analysis       | <a href="#">#20c</a> Definition of analysis population relating to protocol | 13-14    |
| 34 |                            |                                                                             |          |
| 35 | population and             | non-adherence (eg, as randomised analysis), and any                         |          |
| 36 |                            |                                                                             |          |
| 37 | missing data               | statistical methods to handle missing data (eg, multiple                    |          |
| 38 |                            |                                                                             |          |
| 39 |                            | imputation)                                                                 |          |
| 40 |                            |                                                                             |          |
| 41 |                            |                                                                             |          |
| 42 |                            |                                                                             |          |
| 43 | <b>Methods: Monitoring</b> |                                                                             |          |
| 44 |                            |                                                                             |          |
| 45 |                            |                                                                             |          |
| 46 | Data monitoring:           | <a href="#">#21a</a> Composition of data monitoring committee (DMC);        | Supp for |
| 47 |                            |                                                                             |          |
| 48 | formal committee           | summary of its role and reporting structure; statement                      | editors  |
| 49 |                            |                                                                             |          |
| 50 |                            |                                                                             |          |
| 51 |                            | of whether it is independent from the sponsor and                           |          |
| 52 |                            |                                                                             |          |
| 53 |                            | competing interests; and reference to where further                         |          |
| 54 |                            |                                                                             |          |
| 55 |                            | details about its charter can be found, if not in the                       |          |
| 56 |                            |                                                                             |          |
| 57 |                            | protocol. Alternatively, an explanation of why a DMC is                     |          |
| 58 |                            |                                                                             |          |
| 59 |                            |                                                                             |          |
| 60 |                            |                                                                             |          |



|    |                      |                                                                             |       |
|----|----------------------|-----------------------------------------------------------------------------|-------|
| 1  |                      | not needed                                                                  |       |
| 2  |                      |                                                                             |       |
| 3  |                      |                                                                             |       |
| 4  | Data monitoring:     | <a href="#">#21b</a> Description of any interim analyses and stopping       | 14    |
| 5  |                      |                                                                             |       |
| 6  | interim analysis     | guidelines, including who will have access to these                         |       |
| 7  |                      |                                                                             |       |
| 8  |                      | interim results and make the final decision to terminate                    |       |
| 9  |                      |                                                                             |       |
| 10 |                      | the trial                                                                   |       |
| 11 |                      |                                                                             |       |
| 12 |                      |                                                                             |       |
| 13 | Harms                | <a href="#">#22</a> Plans for collecting, assessing, reporting, and         | 14-15 |
| 14 |                      |                                                                             |       |
| 15 |                      | managing solicited and spontaneously reported                               |       |
| 16 |                      |                                                                             |       |
| 17 |                      | adverse events and other unintended effects of trial                        |       |
| 18 |                      |                                                                             |       |
| 19 |                      | interventions or trial conduct                                              |       |
| 20 |                      |                                                                             |       |
| 21 |                      |                                                                             |       |
| 22 |                      |                                                                             |       |
| 23 | Auditing             | <a href="#">#23</a> Frequency and procedures for auditing trial conduct, if | 15    |
| 24 |                      |                                                                             |       |
| 25 |                      | any, and whether the process will be independent from                       |       |
| 26 |                      |                                                                             |       |
| 27 |                      | investigators and the sponsor                                               |       |
| 28 |                      |                                                                             |       |
| 29 |                      |                                                                             |       |
| 30 |                      |                                                                             |       |
| 31 | <b>Ethics and</b>    |                                                                             |       |
| 32 |                      |                                                                             |       |
| 33 | <b>dissemination</b> |                                                                             |       |
| 34 |                      |                                                                             |       |
| 35 |                      |                                                                             |       |
| 36 | Research ethics      | <a href="#">#24</a> Plans for seeking research ethics committee /           | 15    |
| 37 |                      |                                                                             |       |
| 38 | approval             | institutional review board (REC / IRB) approval                             |       |
| 39 |                      |                                                                             |       |
| 40 |                      |                                                                             |       |
| 41 | Protocol             | <a href="#">#25</a> Plans for communicating important protocol              | 15    |
| 42 |                      |                                                                             |       |
| 43 | amendments           | modifications (eg, changes to eligibility criteria,                         |       |
| 44 |                      |                                                                             |       |
| 45 |                      | outcomes, analyses) to relevant parties (eg,                                |       |
| 46 |                      |                                                                             |       |
| 47 |                      | investigators, REC / IRBs, trial participants, trial                        |       |
| 48 |                      |                                                                             |       |
| 49 |                      | registries, journals, regulators)                                           |       |
| 50 |                      |                                                                             |       |
| 51 |                      |                                                                             |       |
| 52 |                      |                                                                             |       |
| 53 |                      |                                                                             |       |
| 54 | Consent or assent    | <a href="#">#26a</a> Who will obtain informed consent or assent from        | 15-16 |
| 55 |                      |                                                                             |       |
| 56 |                      | potential trial participants or authorised surrogates, and                  |       |
| 57 |                      |                                                                             |       |
| 58 |                      |                                                                             |       |
| 59 |                      |                                                                             |       |
| 60 |                      |                                                                             |       |

|    |                       |                                                                                |    |
|----|-----------------------|--------------------------------------------------------------------------------|----|
| 1  |                       | how (see Item 32)                                                              |    |
| 2  |                       |                                                                                |    |
| 3  |                       |                                                                                |    |
| 4  | Consent or assent:    | <a href="#">#26b</a> Additional consent provisions for collection and use of   | 16 |
| 5  |                       |                                                                                |    |
| 6  | ancillary studies     | participant data and biological specimens in ancillary                         |    |
| 7  |                       |                                                                                |    |
| 8  |                       | studies, if applicable                                                         |    |
| 9  |                       |                                                                                |    |
| 10 |                       |                                                                                |    |
| 11 | Confidentiality       | <a href="#">#27</a> How personal information about potential and enrolled      | 16 |
| 12 |                       |                                                                                |    |
| 13 |                       | participants will be collected, shared, and maintained in                      |    |
| 14 |                       |                                                                                |    |
| 15 |                       | order to protect confidentiality before, during, and after                     |    |
| 16 |                       |                                                                                |    |
| 17 |                       | the trial                                                                      |    |
| 18 |                       |                                                                                |    |
| 19 |                       |                                                                                |    |
| 20 |                       |                                                                                |    |
| 21 | Declaration of        | <a href="#">#28</a> Financial and other competing interests for principal      | 17 |
| 22 |                       |                                                                                |    |
| 23 | interests             | investigators for the overall trial and each study site                        |    |
| 24 |                       |                                                                                |    |
| 25 |                       |                                                                                |    |
| 26 | Data access           | <a href="#">#29</a> Statement of who will have access to the final trial       | 16 |
| 27 |                       |                                                                                |    |
| 28 |                       | dataset, and disclosure of contractual agreements that                         |    |
| 29 |                       |                                                                                |    |
| 30 |                       | limit such access for investigators                                            |    |
| 31 |                       |                                                                                |    |
| 32 |                       |                                                                                |    |
| 33 |                       |                                                                                |    |
| 34 | Ancillary and post    | <a href="#">#30</a> Provisions, if any, for ancillary and post-trial care, and | 16 |
| 35 |                       |                                                                                |    |
| 36 | trial care            | for compensation to those who suffer harm from trial                           |    |
| 37 |                       |                                                                                |    |
| 38 |                       | participation                                                                  |    |
| 39 |                       |                                                                                |    |
| 40 |                       |                                                                                |    |
| 41 |                       |                                                                                |    |
| 42 | Dissemination policy: | <a href="#">#31a</a> Plans for investigators and sponsor to communicate        | 16 |
| 43 |                       |                                                                                |    |
| 44 | trial results         | trial results to participants, healthcare professionals,                       |    |
| 45 |                       |                                                                                |    |
| 46 |                       | the public, and other relevant groups (eg, via                                 |    |
| 47 |                       |                                                                                |    |
| 48 |                       | publication, reporting in results databases, or other                          |    |
| 49 |                       |                                                                                |    |
| 50 |                       | data sharing arrangements), including any publication                          |    |
| 51 |                       |                                                                                |    |
| 52 |                       | restrictions                                                                   |    |
| 53 |                       |                                                                                |    |
| 54 |                       |                                                                                |    |
| 55 |                       |                                                                                |    |
| 56 | Dissemination policy: | <a href="#">#31b</a> Authorship eligibility guidelines and any intended use of | 16 |
| 57 |                       |                                                                                |    |
| 58 |                       |                                                                                |    |
| 59 |                       |                                                                                |    |
| 60 |                       |                                                                                |    |

1 authorship professional writers  
 2  
 3  
 4 Dissemination policy: [#31c](#) Plans, if any, for granting public access to the full 16  
 5  
 6 reproducible protocol, participant-level dataset, and statistical code  
 7  
 8 research  
 9

## 11 Appendices

14 Informed consent [#32](#) Model consent form and other related documentation Supp 1  
 15  
 16 materials given to participants and authorised surrogates  
 17  
 18  
 19 Biological specimens [#33](#) Plans for collection, laboratory evaluation, and storage Supp 2  
 20  
 21 of biological specimens for genetic or molecular  
 22  
 23 analysis in the current trial and for future use in  
 24  
 25 ancillary studies, if applicable  
 26  
 27

29 None The SPIRIT Explanation and Elaboration paper is distributed under the terms of the Creative  
 30  
 31 Commons Attribution License CC-BY-NC. This checklist can be completed online using  
 32  
 33 <https://www.goodreports.org/>, a tool made by the [EQUATOR Network](#) in collaboration with  
 34  
 35 [Penelope.ai](#)  
 36  
 37  
 38  
 39  
 40  
 41  
 42  
 43  
 44  
 45  
 46  
 47  
 48  
 49  
 50  
 51  
 52  
 53  
 54  
 55  
 56  
 57  
 58  
 59  
 60
