# Supplementary material for: Serotype 3 Experimental Human Pneumococcal Challenge (EHPC) study protocol: dose ranging and reproducibility in a healthy volunteer population (challenge 3)
Source: PubMed Central journal article supplement — BMJ Open. 2024 Jan 10;14(1):e075948. doi: 10.1136/bmjopen-2023-075948 (PMC10806732; doi:10.1136/bmjopen-2023-075948), 2024-01-10
Supplement: bmjopen-2023-075948supp002.pdf [file bmjopen-2023-075948supp002.pdf]

**Supplemental Material 2. Biological Specimens**

Biological samples are collected from all participants, transferred to the laboratory with an accompanying inventory form and stored, following local standard operating procedures.

The samples are “anonymised” with a participant number at the point of collection. Anonymised samples may be sent to national and international collaborators for further analysis, as detailed in the participant consent form. LSTM may store samples for up to 25yrs. After this time, the remaining samples will be transferred to a research tissue bank (LSTM).
